# Supplementary material for: The burden of skin disease and eye disease due to onchocerciasis in countries formerly under the African Programme for Onchocerciasis Control mandate for 1990, 2020, and 2030
Source: PubMed Central journal article supplement (PMC8312930; doi:10.1371/journal.pntd.0009604), 2021-07-26
Supplement: pntd.0009604.s002.pdf [file pntd.0009604.s002.pdf]

# The burden of skin disease and eye disease due to onchocerciasis in Africa for 1990, 2020, and 2030

S2 Text:

Treatment history and assumptions per APOC project.

Natalie V.S. Vinkeles Melchers<sup>1</sup>, Wilma A. Stolk<sup>1</sup>, Welmoed van Loon<sup>1,2</sup>, Belén Pedrique<sup>3</sup>, Roel Bakker<sup>1</sup>, Michele E. Murdoch<sup>4</sup>, Sake J. de Vlas<sup>1</sup>, Luc E. Coffeng<sup>1</sup>

1. Department of Public Health, Erasmus MC, University Medical Center Rotterdam, Rotterdam, The Netherlands.
2. Institute of Tropical Medicine and International Health, Charité - Universitätsmedizin Berlin, corporate member of Freie Universität Berlin, Humboldt-Universität zu Berlin, and Berlin Institute of Health, Berlin, Germany.
3. Drugs for Neglected Diseases initiative (DND*i*), Geneva, Switzerland
4. Department of Dermatology, Watford General Hospital, Watford, Hertfordshire, UK

\* Correspondence to:

Luc E. Coffeng, Department of Public Health, Erasmus MC, University Medical Center Rotterdam, P.O. box 2040, 3000 CA Rotterdam, The Netherlands; l.coffeng@erasmusmc.nl

Alternative:

Natalie VS Vinkeles Melchers, Department of Public Health, Erasmus MC, University Medical Center Rotterdam, P.O. box 2040, 3000 CA Rotterdam, The Netherlands; n.vinkelesmelchers@erasmusmc.nl, Natalie.melchers@gmail.com; +31 614217276

Table F: Summary table of pre-control onchocerciasis endemicity, population at risk for 1990 and 2030, MDA treatment history by country and APOC-project. Abbreviation: PTS = Post-treatment surveillance.

| Country  | Project          | Endem. levels** | Pop. at risk (x1000) |       | MDA † |                   |               |                      | Vector control | Remarks                     |
|----------|------------------|-----------------|----------------------|-------|-------|-------------------|---------------|----------------------|----------------|-----------------------------|
|          |                  |                 | 1990                 | 2030  | start | cov. at start (%) | mean cov. (%) | No. rounds 1990-2030 |                |                             |
| Angola   | Bengo            | Meso            | 13                   | 39    | 2010  | 75.0              | 70.8          | 20                   | No             |                             |
| Angola   | Benguela         | Hypo            | 25                   | 75    | 2012  | 62.7              | 59.4          | 18                   | No             |                             |
| Angola   | Cuanza Norte     | Meso            | 13                   | 38    | 2011  | 74.9              | 71.2          | 19                   | No             |                             |
| Angola   | Huila            | Meso            | 119                  | 352   | 2007  | 22.0              | 59.2          | 21                   | No             |                             |
| Angola   | Kuando Kubango   | Meso            | 205                  | 607   | 2007  | 65.0              | 68.9          | 22                   | No             |                             |
| Angola   | Lunda Norte      | Hyper           | 153                  | 453   | 2005  | 6.0               | 59.8          | 25                   | No             |                             |
| Angola   | Lunda sul        | Meso            | 129                  | 382   | 2005  | 15.0              | 60.4          | 25                   | No             |                             |
| Angola   | Moxico 1         | Hyper           | 135                  | 399   | 2007  | 22.0              | 58.8          | 23                   | No             |                             |
| Angola   | Namibe           | Meso            | 18                   | 53    | 2019  | 67.0              | 61.4          | 11                   | No             |                             |
| Angola   | NY Benguela      | Hyper           | 57                   | 168   | 2019  | 67.0              | 61.4          | 11                   | No             |                             |
| Angola   | NY Cuanza Norte  | Meso            | 9                    | 27    | 2019  | 67.0              | 61.4          | 11                   | No             |                             |
| Angola   | NY Huila         | Meso            | 11                   | 34    | 2019  | 67.0              | 61.4          | 11                   | No             |                             |
| Angola   | NY Lunda Norte   | Meso            | 33                   | 99    | 2019  | 67.0              | 61.4          | 11                   | No             |                             |
| Angola   | NY Moxico 1      | Meso            | 172                  | 510   | 2019  | 67.0              | 61.4          | 11                   | No             |                             |
| Angola   | P5Angola*        | Hypo            | 131                  | 388   | 2025  | 65.0              | 65.0          | 6                    | No             | <i>Loa loa</i> coendemicity |
| Angola   | Uige             | Hyper           | 95                   | 280   | 2019  | 67.0              | 61.4          | 11                   | No             |                             |
| Angola   | Zaire            | Meso            | 7                    | 21    | 2019  | 67.0              | 61.4          | 11                   | No             |                             |
| Burundi  | Bururi           | Meso            | 220                  | 652   | 2006  | 49.0              | 69.7          | 24                   | No             |                             |
| Burundi  | Cibitoke-Bubanza | Meso            | 526                  | 1,557 | 2005  | 23.0              | 72.4          | 25                   | No             |                             |
| Burundi  | P5Burundi*       | Hypo            | 415                  | 1,228 | 2025  | 65.0              | 65.0          | 6                    | No             | <i>Loa loa</i> coendemicity |
| Burundi  | Rutana           | Hypo            | 171                  | 508   | 2006  | 51.0              | 71.1          | 24                   | No             |                             |
| Cameroon | Adamaoua 1       | Hyper           | 287                  | 850   | 2004  | 47.0              | 67.9          | 26                   | No             |                             |
| Cameroon | Adamaoua 2       | Hyper           | 261                  | 772   | 1999  | 10.0              | 65.8          | 31                   | No             |                             |
| Cameroon | Centre 1         | Hyper           | 265                  | 785   | 2000  | 32.0              | 69.0          | 30                   | No             |                             |
| Cameroon | Centre 2         | Hyper           | 62                   | 185   | 2000  | 13.0              | 64.1          | 29                   | No             |                             |
| Cameroon | Centre 3         | Hyper           | 201                  | 596   | 1999  | 43.0              | 67.4          | 31                   | No             |                             |
| Cameroon | East             | Hyper           | 74                   | 218   | 2005  | 33.0              | 74.7          | 25                   | No             |                             |
| Cameroon | Far North        | Meso            | 174                  | 515   | 2005  | 57.0              | 74.5          | 25                   | No             |                             |
| Cameroon | Littoral 1       | Hyper           | 174                  | 515   | 2006  | 31.0              | 63.1          | 24                   | No             |                             |
| Cameroon | Littoral 2       | Hyper           | 93                   | 275   | 1999  | 38.0              | 67.2          | 31                   | No             |                             |

(continued)

| Country  | Project            | Endem. levels** | Pop. at risk (x1000) |        | MDA † |                   |               |                      | Vector control | Remarks                                                        |
|----------|--------------------|-----------------|----------------------|--------|-------|-------------------|---------------|----------------------|----------------|----------------------------------------------------------------|
|          |                    |                 | 1990                 | 2030   | start | cov. at start (%) | mean cov. (%) | No. rounds 1990-2030 |                |                                                                |
| Cameroon | Northern           | Hyper           | 390                  | 1,155  | 1999  | 21.0              | 69.5          | 31                   | No             |                                                                |
| Cameroon | Northwest          | Hyper           | 507                  | 1,501  | 2004  | 58.0              | 72.5          | 26                   | No             |                                                                |
| Cameroon | P20Cameroon*       | Hyper           | 93                   | 276    | 2016  | 78.3              | 73.0          | 14                   | No             |                                                                |
| Cameroon | P5Cameroon*        | Hypo            | 929                  | 2,751  | 2025  | 65.0              | 65.0          | 6                    | No             | <i>Loa loa</i> coendemicity                                    |
| Cameroon | South              | Hyper           | 185                  | 548    | 2005  | 32.0              | 70.7          | 25                   | No             |                                                                |
| Cameroon | South West 1       | Hyper           | 243                  | 719    | 1999  | 68.0              | 68.8          | 31                   | No             |                                                                |
| Cameroon | South West 2       | Hyper           | 165                  | 489    | 2001  | 37.0              | 74.6          | 29                   | No             |                                                                |
| Cameroon | Western            | Hyper           | 1,016                | 3,007  | 2001  | 19.0              | 72.9          | 29                   | No             |                                                                |
| CAR      | CAR region 3       | Hyper           | 265                  | 784    | 1999  | 73.0              | 62.5          | 28                   | No             | Civil war between 2012-present                                 |
| CAR      | CAR region 4       | Hyper           | 276                  | 817    | 1999  | 73.0              | 61.5          | 28                   | No             | Civil war between 2012-present                                 |
| CAR      | CAR region 5       | Hyper           | 255                  | 756    | 1999  | 73.0              | 58.9          | 26                   | No             | Civil war between 2012-present                                 |
| CAR      | CAR region 6       | Hyper           | 393                  | 1,163  | 1999  | 73.0              | 60.3          | 27                   | No             | Civil war between 2012-present                                 |
| CAR      | P20CAR*            | Hyper           | 39                   | 115    | 2019  | 80.4              | 73.7          | 11                   | No             | Civil war between 2012-present                                 |
| CAR      | P5CAR*             | Hypo            | 88                   | 260    | 2025  | 65.0              | 65.0          | 6                    | No             | Civil war between 2012-present;<br><i>Loa loa</i> coendemicity |
| Chad     | Chad               | Hyper           | 1,068                | 3,160  | 1998  | 40.0              | 72.2          | 32                   | No             |                                                                |
| Chad     | P5Chad*            | Hypo            | 133                  | 393    | 2025  | 65.0              | 65.0          | 6                    | No             | <i>Loa loa</i> coendemicity                                    |
| Chad     | P5Chad propext*    | Hypo            | 76                   | 226    | 2025  | 65.0              | 65.0          | 6                    | No             | <i>Loa loa</i> coendemicity                                    |
| Congo    | Congo 1            | Hyper           | 487                  | 1,441  | 2001  | 36.0              | 70.4          | 29                   | No             |                                                                |
| Congo    | P20Congo*          | Hyper           | 21                   | 63     | 2015  | 81.1              | 76.0          | 15                   | No             |                                                                |
| Congo    | P5Congo*           | Hypo            | 286                  | 846    | 2025  | 65.0              | 65.0          | 6                    | No             | <i>Loa loa</i> coendemicity                                    |
| DRC      | Bandundu           | Hyper           | 3                    | 10     | 2003  | 12.0              | 70.7          | 26                   | No             |                                                                |
| DRC      | Bas-Congo Kinshasa | Hyper           | 803                  | 2,378  | 2004  | 60.0              | 61.9          | 25                   | No             |                                                                |
| DRC      | Butembo-Beni       | Hyper           | 499                  | 1,478  | 2008  | 9.0               | 61.2          | 22                   | No             |                                                                |
| DRC      | Equateur-Kiri      | Hyper           | 664                  | 1,964  | 2006  | 19.0              | 69.9          | 24                   | No             |                                                                |
| DRC      | Ituri-Nord         | Hyper           | 671                  | 1,987  | 2008  | 28.0              | 75.3          | 22                   | No             |                                                                |
| DRC      | Ituri-Sud          | Hyper           | 614                  | 1,816  | 2012  | 71.9              | 68.1          | 18                   | No             |                                                                |
| DRC      | Kasai              | Hyper           | 5,756                | 17,038 | 2001  | 8.0               | 61.9          | 29                   | No             |                                                                |
| DRC      | Kasongo            | Hyper           | 721                  | 2,134  | 2007  | 9.0               | 63.6          | 23                   | No             |                                                                |
| DRC      | Katanga-Nord       | Hyper           | 335                  | 992    | 2006  | 32.0              | 71.7          | 24                   | No             |                                                                |
| DRC      | Katanga-Sud        | Hyper           | 371                  | 1,098  | 2006  | 32.0              | 68.1          | 24                   | No             |                                                                |

(continued)

| Country    | Project            | Endem. levels** | Pop. at risk (x1000) |        | MDA † |                   |               |                      | Vector control | Remarks                                                 |
|------------|--------------------|-----------------|----------------------|--------|-------|-------------------|---------------|----------------------|----------------|---------------------------------------------------------|
|            |                    |                 | 1990                 | 2030   | start | cov. at start (%) | mean cov. (%) | No. rounds 1990-2030 |                |                                                         |
| DRC        | Lualaba            | Hyper           | 120                  | 356    | 2006  | 57.0              | 74.3          | 24                   | No             |                                                         |
| DRC        | Lubutu             | Hyper           | 179                  | 529    | 2008  | 24.0              | 66.7          | 22                   | No             |                                                         |
| DRC        | Masisi-Walikale    | Hyper           | 560                  | 1,659  | 2009  | 31.0              | 67.7          | 21                   | No             |                                                         |
| DRC        | Mongala            | Hyper           | 779                  | 2,306  | 2006  | 8.0               | 68.8          | 24                   | No             |                                                         |
| DRC        | NY Katanga-Nord    | Meso            | 243                  | 720    | 2016  | 71.0              | 66.3          | 14                   | No             | (Post) conflict                                         |
| DRC        | NY Lualaba         | Hyper           | 526                  | 1,557  | 2016  | 71.0              | 66.3          | 14                   | No             |                                                         |
| DRC        | NY Masisi-Walikale | Hyper           | 29                   | 86     | 2016  | 71.9              | 67.1          | 14                   | No             | (Post) conflict                                         |
| DRC        | NY Rutshuru-Ngoma  | Meso            | 5                    | 13     | 2013  | 71.9              | 67.9          | 17                   | No             |                                                         |
| DRC        | NY Sankuru         | Hyper           | 251                  | 743    | 2014  | 71.0              | 66.8          | 16                   | No             |                                                         |
| DRC        | NY Ueles           | Hyper           | 85                   | 253    | 2014  | 71.9              | 67.7          | 16                   | No             |                                                         |
| DRC        | P20DRC*            | Hyper           | 1,259                | 3,726  | 2019  | 71.9              | 65.9          | 11                   | No             | (Post) conflict                                         |
| DRC        | P5DRC*             | Hypo            | 4,003                | 11,848 | 2025  | 65.0              | 65.0          | 6                    | No             | (Post) conflict; <i>Loa loa</i> coendemicity            |
| DRC        | Rutshuru-Ngoma     | Hyper           | 353                  | 1,045  | 2006  | 40.0              | 65.2          | 23                   | No             |                                                         |
| DRC        | Sankuru            | Hyper           | 571                  | 1,690  | 2003  | 42.0              | 71.3          | 27                   | No             |                                                         |
| DRC        | Tshopo             | Hyper           | 853                  | 2,525  | 2003  | 17.0              | 54.0          | 25                   | No             |                                                         |
| DRC        | Tshuapa            | Hyper           | 760                  | 2,249  | 2006  | 4.0               | 57.2          | 24                   | No             |                                                         |
| DRC        | Ubangi-Nord        | Hyper           | 428                  | 1,267  | 2006  | 22.0              | 59.6          | 24                   | No             |                                                         |
| DRC        | Ubangi-Sud         | Hyper           | 722                  | 2,136  | 2006  | 10.0              | 60.8          | 24                   | No             |                                                         |
| DRC        | Ueles              | Hyper           | 842                  | 2,492  | 2002  | 20.0              | 65.5          | 27                   | No             |                                                         |
| Eq. Guinea | Bioko              | Hyper           | 59                   | 176    | 1990  | 53.2              | 49.2          | 23                   | Yes            | Vector control between 1999-2005; PTS since 2016 [1-3]‡ |
| Eq. Guinea | P5EqGuinea*        | Hypo            | 139                  | 412    | 2025  | 65.0              | 65.0          | 6                    | No             | <i>Loa loa</i> coendemicity                             |
| Ethiopia   | Assosa             | Meso            | 317                  | 939    | 2019  | 79.0              | 72.4          | 22                   | No             | Bi-annual MDA since 2019                                |
| Ethiopia   | Bench-Maji         | Hyper           | 420                  | 1,242  | 2003  | 35.0              | 70.1          | 27                   | No             |                                                         |
| Ethiopia   | East Wellega       | Meso            | 514                  | 1,521  | 2004  | 39.0              | 72.5          | 25                   | No             |                                                         |
| Ethiopia   | Gambella           | Hyper           | 61                   | 182    | 2004  | 71.0              | 70.8          | 25                   | No             |                                                         |
| Ethiopia   | Horo Guduru        | Meso            | 30                   | 89     | 2019  | 79.0              | 72.4          | 11                   | No             |                                                         |
| Ethiopia   | Illubabor          | Hyper           | 435                  | 1,287  | 2004  | 77.0              | 76.9          | 26                   | No             |                                                         |
| Ethiopia   | Jimma              | Meso            | 513                  | 1,519  | 2004  | 73.0              | 78.7          | 26                   | No             |                                                         |
| Ethiopia   | Kaffa-Sheka        | Hyper           | 729                  | 2,157  | 2001  | 24.0              | 71.8          | 29                   | No             |                                                         |
| Ethiopia   | Kamashi            | Hyper           | 271                  | 802    | 2016  | 80.0              | 74.7          | 28                   | No             |                                                         |

(continued)

| Country  | Project             | Endem. levels** | Pop. at risk (x1000) |       | MDA † |                   |               |                      | Vector control | Remarks                     |
|----------|---------------------|-----------------|----------------------|-------|-------|-------------------|---------------|----------------------|----------------|-----------------------------|
|          |                     |                 | 1990                 | 2030  | start | cov. at start (%) | mean cov. (%) | No. rounds 1990-2030 |                |                             |
| Ethiopia | Metekel             | Meso            | 93                   | 275   | 2004  | 50.0              | 66.8          | 25                   | No             |                             |
| Ethiopia | North Gondar        | Meso            | 180                  | 533   | 2003  | 37.0              | 68.3          | 27                   | No             |                             |
| Ethiopia | NY East Wellega     | Hyper           | 165                  | 487   | 2016  | 80.0              | 74.7          | 14                   | No             |                             |
| Ethiopia | NY West Wellega     | Meso            | 167                  | 495   | 2016  | 79.0              | 73.7          | 28                   | No             | Bi-annual MDA since 2016    |
| Ethiopia | P20Ethiopia*        | Hyper           | 191                  | 566   | 2019  | 80.0              | 73.3          | 11                   | No             |                             |
| Ethiopia | P5Ethiopia*         | Hypo            | 2,018                | 5,972 | 2023  | 65.0              | 65.0          | 8                    | No             |                             |
| Ethiopia | West Shewa          | Hypo            | 33                   | 98    | 2023  | 65.0              | 65.0          | 8                    | No             |                             |
| Ethiopia | West Wellega        | Hyper           | 590                  | 1,747 | 2004  | 20.0              | 72.7          | 25                   | No             |                             |
| Gabon    | P5Gabon*            | Hypo            | 49                   | 146   | 2025  | 65.0              | 65.0          | 6                    | No             | <i>Loa loa</i> coendemicity |
| Liberia  | All_Liberia         | Meso            | 881                  | 2,606 | 2004  | 60.0              | 66.3          | 26                   | No             | Civil war between 1989-2003 |
| Malawi   | Malawi Extension    | Meso            | 665                  | 1,968 | 2000  | 4.0               | 69.4          | 30                   | No             |                             |
| Malawi   | Thyolo Mwanza       | Meso            | 507                  | 1,501 | 1997  | 13.0              | 69.1          | 33                   | No             |                             |
| Mozamb.  | P20Mozambique*      | Meso            | 9                    | 27    | 2019  | 70.0              | 64.2          | 11                   | No             |                             |
| Mozamb.  | P5Mozambique*       | Hypo            | 27                   | 80    | 2023  | 65.0              | 65.0          | 8                    | No             |                             |
| Nigeria  | Adamawa             | Hyper           | 1,019                | 3,015 | 1999  | 47.0              | 72.9          | 31                   | No             |                             |
| Nigeria  | Akwa Ibom           | Meso            | 17                   | 52    | 2004  | 38.0              | 74.1          | 26                   | No             |                             |
| Nigeria  | Bauchi              | Meso            | 1,044                | 3,089 | 1999  | 15.0              | 63.2          | 31                   | No             |                             |
| Nigeria  | Benue               | Hyper           | 2,058                | 6,092 | 1999  | 11.0              | 62.9          | 31                   | No             |                             |
| Nigeria  | Borno               | Meso            | 820                  | 2,428 | 1999  | 48.0              | 72.1          | 31                   | No             |                             |
| Nigeria  | Cross River         | Hyper           | 744                  | 2,202 | 1998  | 52.0              | 75.1          | 32                   | No             |                             |
| Nigeria  | Edo Delta           | Hyper           | 956                  | 2,831 | 1999  | 74.0              | 75.6          | 31                   | No             |                             |
| Nigeria  | Ekiti               | Meso            | 1,291                | 3,821 | 1999  | 36.0              | 68.7          | 31                   | No             |                             |
| Nigeria  | Enugu Anambra Ebony | Hyper           | 1,421                | 4,206 | 1999  | 63.0              | 76.6          | 31                   | No             |                             |
| Nigeria  | FCT                 | Meso            | 302                  | 893   | 1998  | 44.0              | 71.0          | 32                   | No             |                             |
| Nigeria  | Gombe               | Hyper           | 1,134                | 3,356 | 1999  | 12.0              | 68.3          | 31                   | No             |                             |
| Nigeria  | Imo Abia            | Hyper           | 783                  | 2,319 | 1999  | 69.0              | 65.5          | 31                   | No             |                             |
| Nigeria  | Jigawa              | Hypo            | 212                  | 629   | 1999  | 24.0              | 63.0          | 31                   | No             |                             |
| Nigeria  | Kaduna              | Meso            | 1,650                | 4,884 | 1991  | 77.3              | 77.0          | 39                   | No             |                             |
| Nigeria  | Kano                | Hyper           | 589                  | 1,743 | 1999  | 45.0              | 76.0          | 31                   | No             |                             |
| Nigeria  | Kebbi               | Hypo            | 124                  | 366   | 1999  | 57.0              | 66.8          | 31                   | No             |                             |
| Nigeria  | Kogi                | Hyper           | 1,063                | 3,146 | 1998  | 18.0              | 75.8          | 32                   | No             |                             |
| Nigeria  | Kwara               | Hyper           | 898                  | 2,659 | 1999  | 33.0              | 73.0          | 31                   | No             |                             |

(continued)

| Country  | Project              | Endem. levels** | Pop. at risk (x1000) |        | MDA † |                   |               |                      | Vector control | Remarks                       |
|----------|----------------------|-----------------|----------------------|--------|-------|-------------------|---------------|----------------------|----------------|-------------------------------|
|          |                      |                 | 1990                 | 2030   | start | cov. at start (%) | mean cov. (%) | No. rounds 1990-2030 |                |                               |
| Nigeria  | Niger                | Meso            | 1,579                | 4,675  | 1999  | 16.0              | 66.6          | 31                   | No             |                               |
| Nigeria  | Ogun                 | Meso            | 205                  | 606    | 2002  | 57.0              | 77.2          | 28                   | No             |                               |
| Nigeria  | Ondo                 | Meso            | 814                  | 2,409  | 1999  | 51.0              | 75.9          | 31                   | No             |                               |
| Nigeria  | Osun                 | Meso            | 960                  | 2,842  | 1998  | 13.0              | 63.3          | 32                   | No             |                               |
| Nigeria  | Oyo                  | Meso            | 655                  | 1,938  | 1999  | 31.0              | 65.4          | 31                   | No             |                               |
| Nigeria  | P20Nigeria*          | Hyper           | 132                  | 391    | 2019  | 79.7              | 73.0          | 11                   | No             |                               |
| Nigeria  | P5Nigeria*           | Hypo            | 4,491                | 13,294 | 2025  | 65.0              | 65.0          | 6                    | No             | <i>Loa loa</i> coendemicity   |
| Nigeria  | Plateau Nassarawa    | Meso            | 911                  | 2,695  | 1998  | 53.0              | 72.7          | 20                   | No             | PTS since 2018 [10]‡          |
| Nigeria  | Plateau Nassarawa LF | Hyper           | 922                  | 2,729  | 2000  | 81.5              | 81.5          | 18                   | No             | PTS since 2018 [10]‡          |
| Nigeria  | Taraba               | Hyper           | 991                  | 2,932  | 1998  | 45.0              | 69.1          | 32                   | No             |                               |
| Nigeria  | Yobe                 | Meso            | 366                  | 1,085  | 1999  | 51.0              | 71.4          | 31                   | No             |                               |
| Nigeria  | Zamfara              | Hypo            | 170                  | 503    | 1999  | 60.0              | 73.8          | 31                   | No             |                               |
| S. Sudan | East Bahr El Ghazal  | Hyper           | 326                  | 966    | 2005  | 32.0              | 51.3          | 21                   | No             | Civil war between 2013-2019   |
| S. Sudan | East Equatoria       | Hyper           | 580                  | 1,716  | 2006  | 17.0              | 41.3          | 17                   | No             | Civil war between 2013-2019   |
| S. Sudan | P20SouthSudan*       | Hyper           | 16                   | 48     | 2020  | <0.05             | 54.5          | 10                   | No             | Civil war between 2013-2019   |
| S. Sudan | P5SouthSudan*        | Hypo            | 450                  | 1,331  | 2025  | 65.0              | 65.0          | 6                    | No             | <i>Loa loa</i> coendemicity ? |
| S. Sudan | Upper Nile           | Meso            | 304                  | 899    | 2006  | 12.0              | 39.5          | 17                   | No             | Civil war between 2013-2019   |
| S. Sudan | West Bahr El Ghazal  | Hyper           | 1,758                | 5,205  | 2006  | 3.0               | 44.3          | 24                   | No             |                               |
| S. Sudan | West Equatoria       | Hyper           | 415                  | 1,228  | 2005  | 36.0              | 62.8          | 25                   | No             |                               |
| Sudan    | P5Sudan*             | Hypo            | 127                  | 375    | 2025  | 65.0              | 65.0          | 6                    | No             | <i>Loa loa</i> coendemicity   |
| Sudan    | Sudan                | Hypo            | 120                  | 354    | 2008  | 81.5              | 78.0          | 22                   | No             |                               |
| Sudan    | Sudan Abu Hamed      | Hypo            | 120                  | 354    | 2008  | 81.5              | 78.0          | 22                   | No             |                               |
| Tanzania | Kilosa               | Meso            | 287                  | 849    | 2002  | 62.0              | 74.6          | 28                   | No             |                               |
| Tanzania | Mahenge              | Hyper           | 287                  | 849    | 1998  | 27.0              | 68.4          | 32                   | No             |                               |
| Tanzania | Morogoro             | Meso            | 205                  | 608    | 2004  | 58.0              | 73.1          | 25                   | No             |                               |
| Tanzania | P5Tanzania*          | Hypo            | 520                  | 1,540  | 2023  | 65.0              | 65.0          | 8                    | No             |                               |
| Tanzania | Ruvuma               | Hyper           | 227                  | 671    | 1999  | 35.0              | 68.2          | 31                   | No             |                               |
| Tanzania | Tanga                | Meso            | 178                  | 526    | 2001  | 46.0              | 73.1          | 29                   | No             |                               |
| Tanzania | Tukuyu               | Meso            | 65                   | 193    | 2001  | 65.0              | 75.0          | 29                   | No             |                               |
| Tanzania | Tunduru              | Hyper           | 71                   | 209    | 2005  | 65.0              | 77.3          | 25                   | No             |                               |
| Uganda   | P5Uganda*            | Hypo            | 131                  | 387    | 1997  | 75.0              | 72.8          | 66                   | No             | Bi-annual MDA since 2007      |

(continued)

| Country | Project  | Endem. levels** | Pop. at risk (x1000) |       | MDA † |                   |               |                      | Vector control | Remarks                                                                                                                                                                        |
|---------|----------|-----------------|----------------------|-------|-------|-------------------|---------------|----------------------|----------------|--------------------------------------------------------------------------------------------------------------------------------------------------------------------------------|
|         |          |                 | 1990                 | 2030  | start | cov. at start (%) | mean cov. (%) | No. rounds 1990-2030 |                |                                                                                                                                                                                |
| Uganda  | Phase 1¶ | Hyper           | 205                  | 607   | 1999  | 52.0              | 73.2          | 62                   | Yes            | Bi-annual MDA since 2007; Three years of focal vector control; Interruption suspected, or transmission halted in many foci; Onchocerciasis eliminated in other foci since 2017 |
| Uganda  | Phase 2¶ | Hypo            | 399                  | 1,181 | 1999  | 50.0              | 72.4          | 36                   | Yes            | Bi-annual MDA since 2007; Three years of focal vector control; Onchocerciasis eliminated since 2017                                                                            |
| Uganda  | Phase 3¶ | Hyper           | 736                  | 2,178 | 1999  | 37.0              | 63.8          | 62                   | Yes            | Bi-annual MDA since 2007; Three years of focal vector control.                                                                                                                 |
| Uganda  | Phase 4¶ | Hyper           | 416                  | 1,233 | 1999  | 72.0              | 77.2          | 36                   | Yes            | Bi-annual MDA since 2007; Three years of focal vector control; Onchocerciasis eliminated since 2017                                                                            |
| Uganda  | Phase 5¶ | Hyper           | 268                  | 794   | 2012  | 75.0              | 71.1          | 36                   | Yes            | Bi-annual MDA since 2012                                                                                                                                                       |

Note 1: Population in thousands.

Note 2: We assumed that all APOC-projects would continue MDA until at least the target year of onchocerciasis elimination (2030) except for Bioko (Eq. Guinea) [1-3]‡, several APOC projects in Uganda [4-9]‡, and Plateau and Nassarawa in Nigeria [10]‡.

\* P5 and P20 APOC-projects are a compilation of multiple areas within a country with a prevalence of palpable nodule of  $\geq 5\%$ –  $< 20\%$  and  $\geq 20\%$  respectively.

\*\* Pre-control endemicity levels in terms of mf prevalence in general population (all ages) according to Prost et al. [11]‡ with following adapted cut-offs: hypoendemic ( $\geq 1\%$ –  $< 35\%$ ), mesoendemic ( $\geq 35\%$ –  $< 60\%$ ), hyperendemic ( $\geq 60\%$ –  $< 75\%$ ), very hyperendemic ( $\geq 75\%$ ).

¶ Uganda applied focal vector control over its various APOC projects (i.e. temephos river larvaciding, ground larvaciding, trapping crabs, “slash-and-clear” of vegetation) [4,8,12]‡. As result, vector control was applied in various endemic foci in Uganda through monthly or two-monthly cycles during different time periods for different durations (many foci applied vector control for a combined total duration of two or three years). Several vector control efforts were already initiated in 1994/1995. We account for local vector control in Uganda by simulating three continuous years of vector control (1994-1997), in line with the implementation of the first vector control interventions in Uganda. In many foci in Uganda, transmission of onchocerciasis has been interrupted and in some foci the disease has been eliminated [4-9]‡.

<sup>†</sup> We make a distinction between the MDA coverage at start year of treatment and the mean therapeutic coverage over the total duration of MDA provided (2030 end year of simulations). The mean MDA coverage is for most treated APOC projects higher than the MDA coverage at time of initiation of mass chemotherapy due to scaling-up and initial implementation challenges. Treatment coverage is expressed as the number of people treated among the total at-risk population.

<sup>‡</sup> References:

1. ESPEN Portal. Onchocerciasis maps. Expand Spec Proj Eliminate Neglected Trop Dis (ESPEN) World Health Organization Regional Office for Africa. Available at: <http://espen.afro.who.int/diseases/onchocerciasis>. Accessed on: 10 May 2021.
2. Herrador Z, Garcia B, Ncogo P, Perteguer MJ, Rubio JM, Rivas E, et al. Interruption of onchocerciasis transmission in Bioko Island: Accelerating the movement from control to elimination in Equatorial Guinea. Wanji S. *PLoS Negl Trop Dis*. Public Library of Science; 2018;12: e0006471.
3. Traoré S, Wilson MD, Sima A, Barro T, Diallo A, Ak? A, et al. The elimination of the onchocerciasis vector from the island of Bioko as a result of larviciding by the WHO African Programme for Onchocerciasis Control. *Acta Trop*. 2009;111: 211-218.
4. Katarwa MN, Lakwo T, Habomugisha P, Unnasch TR, Garms R, et al. (2018) After 70 years of fighting an age-old scourge, onchocerciasis in Uganda, the end is in sight. *Int Health*10: i79–i88.
5. Katarwa MN, Lakwo T, Habomugisha P, Agunyo S, Byamukama E, et al. (2014) Transmission of *Onchocerca volvulus* by *Simulium neavei* in Mount Elgon focus of eastern Uganda has been interrupted. *Am J Trop Med Hyg* 90: 1159–1166.
6. Lakwo TL, Garms R, Rubaale T, Katarwa M, Walsh F, et al. (2013) The disappearance of onchocerciasis from the Itwara focus, western Uganda after elimination of the vector *Simulium neavei* and 19 years of annual ivermectin treatments. *Acta Trop* 126: 218–221.
7. Katarwa MN, Walsh F, Habomugisha P, Lakwo TL, Agunyo S, et al. (2012) Transmission of onchocerciasis in Wadelai focus of northwestern Uganda has been interrupted and the disease eliminated. *J Parasitol Res* 2012.
8. Katarwa MN, Katamanywa J, Lakwo T, Habomugisha P, Byamukama E, et al. (2016) The imaramagambo onchocerciasis focus in southwestern Uganda: Interruption of transmission after disappearance of the vector *simulium neavei* and its associated freshwater crabs. *Am J Trop Med Hyg* 95: 417–425.
9. Katarwa MN, Habomugisha P, Khainza A, Oguttu DW, Byamukama E, et al. (2020) Historical elimination of onchocerciasis from victoria Nile focus in Central Uganda verified using WHO criteria. *Am J Trop Med Hyg* 102: 1411–1416.
10. Richards FO, Eigege A, Umaru J, Kahansim B, Adelamo S, et al. (2020) The interruption of transmission of human onchocerciasis by an annual mass drug administration program in Plateau and Nasarawa States, Nigeria. *Am J Trop Med Hyg* 102: 582–592.
11. Prost A, Hervouet JP, Thylefors B. The degrees of endemicity of onchocerciasis. *Bull World Health Organ*. 1979; 57: 655-662.
12. Jacob BG, Loum D, Lakwo TL, Katholi CR, Habomugisha P, Byamukama E, et al. (2018) Community-directed vector control to supplement mass drug distribution for onchocerciasis elimination in the Madi mid-North focus of Northern Uganda. *PLoS Negl Trop Dis* 12(8): e0006702.
