# Supplementary material for: The burden of skin disease and eye disease due to onchocerciasis in countries formerly under the African Programme for Onchocerciasis Control mandate for 1990, 2020, and 2030
Source: PubMed Central journal article supplement (PMC8312930; doi:10.1371/journal.pntd.0009604), 2021-07-26
Supplement: pntd.0009604.s003.pdf [file pntd.0009604.s003.pdf]

# The burden of skin disease and eye disease due to onchocerciasis in Africa for 1990, 2020, and 2030

S3 Text:

Additional tables with case numbers by age, sex, endemicity level, or APOC-project

Natalie V.S. Vinkeles Melchers<sup>1</sup>, Wilma A. Stolk<sup>1</sup>, Welmoed van Loon<sup>1,2</sup>, Belén Pedrique<sup>3</sup>, Roel Bakker<sup>1</sup>, Michele E. Murdoch<sup>4</sup>, Sake J. de Vlas<sup>1</sup>, Luc E. Coffeng<sup>1</sup>

1. Department of Public Health, Erasmus MC, University Medical Center Rotterdam, Rotterdam, The Netherlands.
2. Institute of Tropical Medicine and International Health, Charité - Universitätsmedizin Berlin, corporate member of Freie Universität Berlin, Humboldt-Universität zu Berlin, and Berlin Institute of Health, Berlin, Germany.
3. Drugs for Neglected Diseases initiative (DND*i*), Geneva, Switzerland
4. Department of Dermatology, Watford General Hospital, Watford, Hertfordshire, UK

\* Correspondence to:

Luc E. Coffeng, Department of Public Health, Erasmus MC, University Medical Center Rotterdam, P.O. box 2040, 3000 CA Rotterdam, The Netherlands; l.coffeng@erasmusmc.nl

Alternative:

Natalie VS Vinkeles Melchers, Department of Public Health, Erasmus MC, University Medical Center Rotterdam, P.O. box 2040, 3000 CA Rotterdam, The Netherlands; n.vinkelesmelchers@erasmusmc.nl, Natalie.melchers@gmail.com; +31 614217276

Table G: Population at risk, number of cases, and DALYs lost due to onchocercal eye disease (OED) stratified by bioclimate for 1990, 2020, and 2030. Absolute numbers (N and DALYs) are presented in thousands.

|                         | 1990   |     |       | 2020    |       |       | 2030    |       |       |
|-------------------------|--------|-----|-------|---------|-------|-------|---------|-------|-------|
|                         | N      | %   | DALYs | N       | %     | DALYs | N       | %     | DALYs |
| <b>Forest areas</b>     |        |     |       |         |       |       |         |       |       |
| Total populaton at risk | 54,399 | 100 | —     | 122,757 | 100   | —     | 161,014 | 100   | —     |
| Visual impairment       | 48     | 0.1 | 1     | 48      | <0.05 | 1     | 30      | <0.05 | 1     |
| Blindness               | 62     | 0.1 | 430   | 39      | <0.05 | 268   | 17      | <0.05 | 115   |
| Eye disease (OED)       | 109    | 0.2 | 432   | 87      | 0.1   | 270   | 47      | <0.05 | 116   |
| <b>Savanna areas</b>    |        |     |       |         |       |       |         |       |       |
| Total populaton at risk | 25,369 | 100 | —     | 57,247  | 100   | —     | 75,088  | 100   | —     |
| Visual impairment       | 374    | 1.5 | 12    | 378     | 0.7   | 12    | 286     | 0.4   | 9     |
| Blindness               | 133    | 0.5 | 966   | 87      | 0.2   | 635   | 52      | 0.1   | 376   |
| Eye disease (OED)       | 506    | 2.0 | 978   | 465     | 0.8   | 647   | 338     | 0.4   | 385   |
| <b>Total</b>            |        |     |       |         |       |       |         |       |       |
| Total populaton at risk | 79,768 | 100 | —     | 180,004 | 100   | —     | 236,102 | 100   | —     |
| Visual impairment       | 421    | 0.5 | 13    | 426     | 0.2   | 13    | 316     | 0.1   | 10    |
| Blindness               | 194    | 0.2 | 1,397 | 126     | 0.1   | 903   | 69      | <0.05 | 491   |
| Eye disease (OED)       | 616    | 0.8 | 1,410 | 552     | 0.3   | 916   | 384     | 0.2   | 501   |

Table H: Population at risk and number of cases stratified by age (males and females combined) for 1990. Absolute numbers (N and DALYs) are presented in thousands.

| Age category:                     | 0-1            |                 | 2-4            |                 | 5-9            |                 | 10-19        |                 | 20-29        |             | 30-49        |             | 50+          |             | Total         |             |
|-----------------------------------|----------------|-----------------|----------------|-----------------|----------------|-----------------|--------------|-----------------|--------------|-------------|--------------|-------------|--------------|-------------|---------------|-------------|
|                                   | N              | %               | N              | %               | N              | %               | N            | %               | N            | %           | N            | %           | N            | %           | N             | %           |
| Total populaton at risk           | 6,314          | 100             | 7,999          | 100             | 11,068         | 100             | 17,857       | 100             | 13,210       | 100         | 15,720       | 100         | 7,599        | 100         | 79,768        | 100         |
| <b>Infection:</b>                 |                |                 |                |                 |                |                 |              |                 |              |             |              |             |              |             |               |             |
| Mf-positive                       | <0.5           | <0.05           | 42             | 0.5             | 883            | 8.0             | 5,663        | 31.7            | 6,722        | 50.9        | 8,546        | 54.4        | 4,107        | 54.0        | 25,964        | 32.5        |
| Mf-positive (age 5+)              | <0.5           | <0.05           | <0.5           | <0.05           | 883            | 8.0             | 5,663        | 31.7            | 6,722        | 50.9        | 8,546        | 54.4        | 4,107        | 54.0        | 25,922        | 32.5        |
| Worm infected                     | 7              | 0.1             | 345            | 4.3             | 2,247          | 20.3            | 8,067        | 45.2            | 7,842        | 59.4        | 9,668        | 61.5        | 4,650        | 61.2        | 32,825        | 41.2        |
| <b>Clinical manifestations:</b>   |                |                 |                |                 |                |                 |              |                 |              |             |              |             |              |             |               |             |
| Palpable nodules                  | <0.5           | <0.05           | 5              | 0.1             | 144            | 1.3             | 1,354        | 7.6             | 2,053        | 15.5        | 2,756        | 17.5        | 1,304        | 17.2        | 7,617         | 9.5         |
| <b>Reversible skin disease:</b>   |                |                 |                |                 |                |                 |              |                 |              |             |              |             |              |             |               |             |
| Severe itch                       | <0.5           | <0.05           | <0.5           | <0.05           | 13             | 0.1             | 411          | 2.3             | 1,021        | 7.7         | 1,778        | 11.3        | 891          | 11.7        | 4,115         | 5.2         |
| Reactive skin disease             | <0.5           | <0.05           | <0.5           | <0.05           | 11             | 0.1             | 343          | 1.9             | 817          | 6.2         | 1,300        | 8.3         | 618          | 8.1         | 3,089         | 3.9         |
| <b>Reversible skin disease</b>    | <b>&lt;0.5</b> | <b>&lt;0.05</b> | <b>&lt;0.5</b> | <b>&lt;0.05</b> | <b>23</b>      | <b>0.2</b>      | <b>755</b>   | <b>4.2</b>      | <b>1,839</b> | <b>13.9</b> | <b>3,078</b> | <b>19.6</b> | <b>1,510</b> | <b>19.9</b> | <b>7,205</b>  | <b>9.0</b>  |
| <b>Irreversible skin disease:</b> |                |                 |                |                 |                |                 |              |                 |              |             |              |             |              |             |               |             |
| Mild depigmentation               | <0.5           | <0.05           | <0.5           | <0.05           | <0.5           | <0.05           | 30           | 0.2             | 145          | 1.1         | 433          | 2.8         | 327          | 4.3         | 935           | 1.2         |
| Severe depigmentation             | <0.5           | <0.05           | <0.5           | <0.05           | <0.5           | <0.05           | 13           | 0.1             | 104          | 0.8         | 462          | 2.9         | 479          | 6.3         | 1,057         | 1.3         |
| Atrophy                           | <0.5           | <0.05           | <0.5           | <0.05           | <0.5           | <0.05           | 1            | <0.05           | 15           | 0.1         | <0.5         | <0.05       | <0.5         | <0.05       | 16            | <0.05       |
| Hanging groin                     | <0.5           | <0.05           | <0.5           | <0.05           | <0.5           | <0.05           | <0.5         | <0.05           | <0.5         | <0.05       | 9            | 0.1         | 23           | 0.3         | 33            | <0.05       |
| <b>Irreversible skin disease</b>  | <b>&lt;0.5</b> | <b>&lt;0.05</b> | <b>&lt;0.5</b> | <b>&lt;0.05</b> | <b>&lt;0.5</b> | <b>&lt;0.05</b> | <b>44</b>    | <b>0.2</b>      | <b>264</b>   | <b>2.0</b>  | <b>904</b>   | <b>5.7</b>  | <b>829</b>   | <b>10.9</b> | <b>2,041</b>  | <b>2.6</b>  |
| <b>Total skin disease (OSD)</b>   | <b>&lt;0.5</b> | <b>&lt;0.05</b> | <b>5</b>       | <b>0.1</b>      | <b>167</b>     | <b>1.5</b>      | <b>2,152</b> | <b>12.1</b>     | <b>4,156</b> | <b>31.5</b> | <b>6,738</b> | <b>42.9</b> | <b>3,643</b> | <b>47.9</b> | <b>16,862</b> | <b>21.1</b> |
| <b>Eye disease (OED):</b>         |                |                 |                |                 |                |                 |              |                 |              |             |              |             |              |             |               |             |
| Visual impairment                 | <0.5           | <0.05           | <0.5           | <0.05           | <0.5           | <0.05           | 3            | <0.05           | 32           | 0.2         | 183          | 1.2         | 203          | 2.7         | 421           | 0.5         |
| Blindness                         | <0.5           | <0.05           | <0.5           | <0.05           | <0.5           | <0.05           | <0.5         | <0.05           | 10           | 0.1         | 87           | 0.6         | 97           | 1.3         | 194           | 0.2         |
| <b>Eye disease (OED)</b>          | <b>&lt;0.5</b> | <b>&lt;0.05</b> | <b>&lt;0.5</b> | <b>&lt;0.05</b> | <b>&lt;0.5</b> | <b>&lt;0.05</b> | <b>3</b>     | <b>&lt;0.05</b> | <b>42</b>    | <b>0.3</b>  | <b>270</b>   | <b>1.7</b>  | <b>300</b>   | <b>3.9</b>  | <b>616</b>    | <b>0.8</b>  |
| <b>Total all manifestations</b>   | <b>&lt;0.5</b> | <b>&lt;0.05</b> | <b>5</b>       | <b>0.1</b>      | <b>167</b>     | <b>1.5</b>      | <b>2,155</b> | <b>12.1</b>     | <b>4,199</b> | <b>31.8</b> | <b>7,008</b> | <b>44.6</b> | <b>3,943</b> | <b>51.9</b> | <b>17,478</b> | <b>21.9</b> |

Note: Total skin disease (OSD) is defined as the sum of the number of cases with palpable nodules as well as reversible and irreversible skin disease.

Table I: Population at risk and number of cases in **males** stratified by age for 1990. Absolute numbers (N and DALYs) are presented in thousands.

| Age category:                     | 0-1            |                 | 2-4            |                 | 5-9            |                 | 10-19        |                 | 20-29        |             | 30-49        |             | 50+          |             | Total         |             |
|-----------------------------------|----------------|-----------------|----------------|-----------------|----------------|-----------------|--------------|-----------------|--------------|-------------|--------------|-------------|--------------|-------------|---------------|-------------|
|                                   | N              | %               | N              | %               | N              | %               | N            | %               | N            | %           | N            | %           | N            | %           | N             | %           |
| Total populaton at risk           | 3,156          | 100             | 3,997          | 100             | 5,539          | 100             | 8,936        | 100             | 6,615        | 100         | 7,890        | 100         | 3,805        | 100         | 39,940        | 100         |
| <b>Infection:</b>                 |                |                 |                |                 |                |                 |              |                 |              |             |              |             |              |             |               |             |
| Mf-positive                       | <0.5           | <0.05           | 27             | 0.7             | 536            | 9.7             | 3,216        | 36.0            | 3,648        | 55.1        | 4,602        | 58.3        | 2,203        | 57.9        | 14,231        | 35.6        |
| Mf-positive (age 5+)              | <0.5           | <0.05           | <0.5           | <0.05           | 536            | 9.7             | 3,216        | 36.0            | 3,648        | 55.1        | 4,602        | 58.3        | 2,203        | 57.9        | 14,204        | 35.6        |
| Worm infected                     | 4              | 0.1             | 199            | 5.0             | 1,266          | 22.9            | 4,359        | 48.8            | 4,121        | 62.3        | 5,060        | 64.1        | 2,425        | 63.7        | 17,434        | 43.7        |
| <b>Clinical manifestations:</b>   |                |                 |                |                 |                |                 |              |                 |              |             |              |             |              |             |               |             |
| Palpable nodules                  | <0.5           | <0.05           | 3              | 0.1             | 90             | 1.6             | 808          | 9.0             | 1,189        | 18.0        | 1,585        | 20.1        | 746          | 19.6        | 4,423         | 11.1        |
| <b>Reversible skin disease:</b>   |                |                 |                |                 |                |                 |              |                 |              |             |              |             |              |             |               |             |
| Severe itch                       | <0.5           | <0.05           | <0.5           | <0.05           | 8              | 0.1             | 254          | 2.8             | 605          | 9.1         | 1,035        | 13.1        | 516          | 13.6        | 2,418         | 6.1         |
| Reactive skin disease             | <0.5           | <0.05           | <0.5           | <0.05           | 7              | 0.1             | 214          | 2.4             | 493          | 7.4         | 775          | 9.8         | 367          | 9.6         | 1,856         | 4.6         |
| <b>Reversible skin disease</b>    | <b>&lt;0.5</b> | <b>&lt;0.05</b> | <b>&lt;0.5</b> | <b>&lt;0.05</b> | <b>15</b>      | <b>0.3</b>      | <b>468</b>   | <b>5.2</b>      | <b>1,097</b> | <b>16.6</b> | <b>1,810</b> | <b>22.9</b> | <b>883</b>   | <b>23.2</b> | <b>4,274</b>  | <b>10.7</b> |
| <b>Irreversible skin disease:</b> |                |                 |                |                 |                |                 |              |                 |              |             |              |             |              |             |               |             |
| Mild depigmentation               | <0.5           | <0.05           | <0.5           | <0.05           | <0.5           | <0.05           | 19           | 0.2             | 89           | 1.3         | 252          | 3.2         | 183          | 4.8         | 544           | 1.4         |
| Severe depigmentation             | <0.5           | <0.05           | <0.5           | <0.05           | <0.5           | <0.05           | 9            | 0.1             | 67           | 1.0         | 286          | 3.6         | 288          | 7.6         | 650           | 1.6         |
| Atrophy                           | <0.5           | <0.05           | <0.5           | <0.05           | <0.5           | <0.05           | 1            | <0.05           | 10           | 0.2         | <0.5         | <0.05       | <0.5         | <0.05       | 11            | <0.05       |
| Hanging groin                     | <0.5           | <0.05           | <0.5           | <0.05           | <0.5           | <0.05           | <0.5         | <0.05           | <0.5         | <0.05       | 7            | 0.1         | 16           | 0.4         | 23            | 0.1         |
| <b>Irreversible skin disease</b>  | <b>&lt;0.5</b> | <b>&lt;0.05</b> | <b>&lt;0.5</b> | <b>&lt;0.05</b> | <b>&lt;0.5</b> | <b>&lt;0.05</b> | <b>29</b>    | <b>0.3</b>      | <b>167</b>   | <b>2.5</b>  | <b>545</b>   | <b>6.9</b>  | <b>488</b>   | <b>12.8</b> | <b>1,228</b>  | <b>3.1</b>  |
| <b>Total skin disease (OSD)</b>   | <b>&lt;0.5</b> | <b>&lt;0.05</b> | <b>3</b>       | <b>0.1</b>      | <b>105</b>     | <b>1.9</b>      | <b>1,305</b> | <b>14.6</b>     | <b>2,454</b> | <b>37.1</b> | <b>3,941</b> | <b>49.9</b> | <b>2,117</b> | <b>55.6</b> | <b>9,925</b>  | <b>24.9</b> |
| <b>Eye disease (OED):</b>         |                |                 |                |                 |                |                 |              |                 |              |             |              |             |              |             |               |             |
| Visual impairment                 | <0.5           | <0.05           | <0.5           | <0.05           | <0.5           | <0.05           | 2            | <0.05           | 22           | 0.3         | 117          | 1.5         | 123          | 3.2         | 264           | 0.7         |
| Blindness                         | <0.5           | <0.05           | <0.5           | <0.05           | <0.5           | <0.05           | <0.5         | <0.05           | 7            | 0.1         | 60           | 0.8         | 63           | 1.7         | 131           | 0.3         |
| <b>Eye disease (OED)</b>          | <b>&lt;0.5</b> | <b>&lt;0.05</b> | <b>&lt;0.5</b> | <b>&lt;0.05</b> | <b>&lt;0.5</b> | <b>&lt;0.05</b> | <b>2</b>     | <b>&lt;0.05</b> | <b>29</b>    | <b>0.4</b>  | <b>177</b>   | <b>2.2</b>  | <b>186</b>   | <b>4.9</b>  | <b>395</b>    | <b>1.0</b>  |
| <b>Total all manifestations</b>   | <b>&lt;0.5</b> | <b>&lt;0.05</b> | <b>3</b>       | <b>0.1</b>      | <b>105</b>     | <b>1.9</b>      | <b>1,308</b> | <b>14.6</b>     | <b>2,483</b> | <b>37.5</b> | <b>4,118</b> | <b>52.2</b> | <b>2,303</b> | <b>60.5</b> | <b>10,320</b> | <b>25.8</b> |

Note: Total skin disease (OSD) is defined as the sum of the number of cases with palpable nodules as well as reversible and irreversible skin disease.

Table J: Population at risk and number of cases in **females** stratified by age for 1990. Absolute numbers (N and DALYs) are presented in thousands.

| Age category:                     | 0-1            |                 | 2-4            |                 | 5-9            |                 | 10-19      |                 | 20-29        |             | 30-49        |             | 50+          |             | Total        |             |
|-----------------------------------|----------------|-----------------|----------------|-----------------|----------------|-----------------|------------|-----------------|--------------|-------------|--------------|-------------|--------------|-------------|--------------|-------------|
|                                   | N              | %               | N              | %               | N              | %               | N          | %               | N            | %           | N            | %           | N            | %           | N            | %           |
| Total populaton at risk           | 3,157          | 100             | 4,002          | 100             | 5,529          | 100             | 8,921      | 100             | 6,594        | 100         | 7,831        | 100         | 3,795        | 100         | 39,828       | 100         |
| <b>Infection:</b>                 |                |                 |                |                 |                |                 |            |                 |              |             |              |             |              |             |              |             |
| Mf-positive                       | <0.5           | <0.05           | 15             | 0.4             | 347            | 6.3             | 2,447      | 27.4            | 3,074        | 46.6        | 3,945        | 50.4        | 1,904        | 50.2        | 11,732       | 29.5        |
| Mf-positive (age 5+)              | <0.5           | <0.05           | <0.5           | <0.05           | 347            | 6.3             | 2,447      | 27.4            | 3,074        | 46.6        | 3,945        | 50.4        | 1,904        | 50.2        | 11,717       | 29.4        |
| Worm infected                     | 3              | 0.1             | 146            | 3.6             | 980            | 17.7            | 3,708      | 41.6            | 3,721        | 56.4        | 4,608        | 58.8        | 2,225        | 58.6        | 15,391       | 38.6        |
| <b>Clinical manifestations:</b>   |                |                 |                |                 |                |                 |            |                 |              |             |              |             |              |             |              |             |
| Palpable nodules                  | <0.5           | <0.05           | 2              | 0.1             | 54             | 1.0             | 545        | 6.1             | 864          | 13.1        | 1,171        | 15.0        | 558          | 14.7        | 3,194        | 8.0         |
| <b>Reversible skin disease:</b>   |                |                 |                |                 |                |                 |            |                 |              |             |              |             |              |             |              |             |
| Severe itch                       | <0.5           | <0.05           | <0.5           | <0.05           | 4              | 0.1             | 158        | 1.8             | 417          | 6.3         | 743          | 9.5         | 375          | 9.9         | 1,697        | 4.3         |
| Reactive skin disease             | <0.5           | <0.05           | <0.5           | <0.05           | 4              | 0.1             | 129        | 1.4             | 324          | 4.9         | 525          | 6.7         | 252          | 6.6         | 1,234        | 3.1         |
| <b>Reversible skin disease</b>    | <b>&lt;0.5</b> | <b>&lt;0.05</b> | <b>&lt;0.5</b> | <b>&lt;0.05</b> | <b>8</b>       | <b>0.1</b>      | <b>287</b> | <b>3.2</b>      | <b>741</b>   | <b>11.2</b> | <b>1,268</b> | <b>16.2</b> | <b>627</b>   | <b>16.5</b> | <b>2,931</b> | <b>7.4</b>  |
| <b>Irreversible skin disease:</b> |                |                 |                |                 |                |                 |            |                 |              |             |              |             |              |             |              |             |
| Mild depigmentation               | <0.5           | <0.05           | <0.5           | <0.05           | <0.5           | <0.05           | 10         | 0.1             | 56           | 0.8         | 181          | 2.3         | 144          | 3.8         | 391          | 1.0         |
| Severe depigmentation             | <0.5           | <0.05           | <0.5           | <0.05           | <0.5           | <0.05           | 4          | <0.05           | 37           | 0.6         | 176          | 2.2         | 190          | 5.0         | 407          | 1.0         |
| Atrophy                           | <0.5           | <0.05           | <0.5           | <0.05           | <0.5           | <0.05           | <0.5       | <0.05           | 5            | 0.1         | <0.5         | <0.05       | <0.5         | <0.05       | 5            | <0.05       |
| Hanging groin                     | <0.5           | <0.05           | <0.5           | <0.05           | <0.5           | <0.05           | <0.5       | <0.05           | <0.5         | <0.05       | 2            | <0.05       | 7            | 0.2         | 10           | <0.05       |
| <b>Irreversible skin disease</b>  | <b>&lt;0.5</b> | <b>&lt;0.05</b> | <b>&lt;0.5</b> | <b>&lt;0.05</b> | <b>&lt;0.5</b> | <b>&lt;0.05</b> | <b>15</b>  | <b>0.2</b>      | <b>97</b>    | <b>1.5</b>  | <b>359</b>   | <b>4.6</b>  | <b>341</b>   | <b>9.0</b>  | <b>813</b>   | <b>2.0</b>  |
| <b>Total skin disease (OSD)</b>   | <b>&lt;0.5</b> | <b>&lt;0.05</b> | <b>2</b>       | <b>0.1</b>      | <b>62</b>      | <b>1.1</b>      | <b>847</b> | <b>9.5</b>      | <b>1,703</b> | <b>25.8</b> | <b>2,797</b> | <b>35.7</b> | <b>1,527</b> | <b>40.2</b> | <b>6,937</b> | <b>17.4</b> |
| <b>Eye disease (OED):</b>         |                |                 |                |                 |                |                 |            |                 |              |             |              |             |              |             |              |             |
| Visual impairment                 | <0.5           | <0.05           | <0.5           | <0.05           | <0.5           | <0.05           | 1          | <0.05           | 10           | 0.2         | 66           | 0.8         | 81           | 2.1         | 157          | 0.4         |
| Blindness                         | <0.5           | <0.05           | <0.5           | <0.05           | <0.5           | <0.05           | <0.5       | <0.05           | 3            | <0.05       | 27           | 0.3         | 33           | 0.9         | 63           | 0.2         |
| <b>Eye disease (OED)</b>          | <b>&lt;0.5</b> | <b>&lt;0.05</b> | <b>&lt;0.5</b> | <b>&lt;0.05</b> | <b>&lt;0.5</b> | <b>&lt;0.05</b> | <b>1</b>   | <b>&lt;0.05</b> | <b>13</b>    | <b>0.2</b>  | <b>93</b>    | <b>1.2</b>  | <b>114</b>   | <b>3.0</b>  | <b>221</b>   | <b>0.6</b>  |
| <b>Total all manifestations</b>   | <b>&lt;0.5</b> | <b>&lt;0.05</b> | <b>2</b>       | <b>0.1</b>      | <b>62</b>      | <b>1.1</b>      | <b>848</b> | <b>9.5</b>      | <b>1,716</b> | <b>26.0</b> | <b>2,890</b> | <b>36.9</b> | <b>1,641</b> | <b>43.2</b> | <b>7,158</b> | <b>18.0</b> |

Note: Total skin disease (OSD) is defined as the sum of the number of cases with palpable nodules as well as reversible and irreversible skin disease.

Table K: Population at risk and number of cases stratified by age (males and females combined) for 2020. Absolute numbers (N and DALYs) are presented in thousands.

| Age category:                     | 0-1            |                 | 2-4            |                 | 5-9            |                 | 10-19      |                 | 20-29        |                 | 30-49        |             | 50+          |             | Total        |            |
|-----------------------------------|----------------|-----------------|----------------|-----------------|----------------|-----------------|------------|-----------------|--------------|-----------------|--------------|-------------|--------------|-------------|--------------|------------|
|                                   | N              | %               | N              | %               | N              | %               | N          | %               | N            | %               | N            | %           | N            | %           | N            | %          |
| Total populaton at risk           | 14,214         | 100             | 18,055         | 100             | 24,943         | 100             | 40,253     | 100             | 29,820       | 100             | 35,498       | 100         | 17,221       | 100         | 180,004      | 100        |
| <b>Infection:</b>                 |                |                 |                |                 |                |                 |            |                 |              |                 |              |             |              |             |              |            |
| Mf-positive                       | <0.5           | <0.05           | 8              | <0.05           | 268            | 1.1             | 2,570      | 6.4             | 3,755        | 12.6            | 5,057        | 14.2        | 2,433        | 14.1        | 14,092       | 7.8        |
| Mf-positive (age 5+)              | <0.5           | <0.05           | <0.5           | <0.05           | 268            | 1.1             | 2,570      | 6.4             | 3,755        | 12.6            | 5,057        | 14.2        | 2,433        | 14.1        | 14,084       | 7.8        |
| Worm infected                     | 2              | <0.05           | 138            | 0.8             | 1,119          | 4.5             | 5,619      | 14.0            | 6,792        | 22.8            | 9,040        | 25.5        | 4,363        | 25.3        | 27,073       | 15.0       |
| <b>Clinical manifestations:</b>   |                |                 |                |                 |                |                 |            |                 |              |                 |              |             |              |             |              |            |
| Palpable nodules                  | <0.5           | <0.05           | 1              | <0.05           | 36             | 0.1             | 517        | 1.3             | 1,025        | 3.4             | 1,517        | 4.3         | 714          | 4.1         | 3,810        | 2.1        |
| <b>Reversible skin disease:</b>   |                |                 |                |                 |                |                 |            |                 |              |                 |              |             |              |             |              |            |
| Severe itch                       | <0.5           | <0.05           | <0.5           | <0.05           | 2              | <0.05           | 96         | 0.2             | 345          | 1.2             | 787          | 2.2         | 433          | 2.5         | 1,663        | 0.9        |
| Reactive skin disease             | <0.5           | <0.05           | <0.5           | <0.05           | 2              | <0.05           | 67         | 0.2             | 217          | 0.7             | 374          | 1.1         | 186          | 1.1         | 845          | 0.5        |
| <b>Reversible skin disease</b>    | <b>&lt;0.5</b> | <b>&lt;0.05</b> | <b>&lt;0.5</b> | <b>&lt;0.05</b> | <b>3</b>       | <b>&lt;0.05</b> | <b>163</b> | <b>0.4</b>      | <b>561</b>   | <b>1.9</b>      | <b>1,161</b> | <b>3.3</b>  | <b>619</b>   | <b>3.6</b>  | <b>2,508</b> | <b>1.4</b> |
| <b>Irreversible skin disease:</b> |                |                 |                |                 |                |                 |            |                 |              |                 |              |             |              |             |              |            |
| Mild depigmentation               | <0.5           | <0.05           | <0.5           | <0.05           | <0.5           | <0.05           | 6          | <0.05           | 62           | 0.2             | 461          | 1.3         | 588          | 3.4         | 1,117        | 0.6        |
| Severe depigmentation             | <0.5           | <0.05           | <0.5           | <0.05           | <0.5           | <0.05           | 2          | <0.05           | 32           | 0.1             | 404          | 1.1         | 744          | 4.3         | 1,181        | 0.7        |
| Atrophy                           | <0.5           | <0.05           | <0.5           | <0.05           | <0.5           | <0.05           | <0.5       | <0.05           | 3            | <0.05           | <0.5         | <0.05       | <0.5         | <0.05       | 3            | <0.05      |
| Hanging groin                     | <0.5           | <0.05           | <0.5           | <0.05           | <0.5           | <0.05           | <0.5       | <0.05           | <0.5         | <0.05           | 3            | <0.05       | 23           | 0.1         | 27           | <0.05      |
| <b>Irreversible skin disease</b>  | <b>&lt;0.5</b> | <b>&lt;0.05</b> | <b>&lt;0.5</b> | <b>&lt;0.05</b> | <b>&lt;0.5</b> | <b>&lt;0.05</b> | <b>8</b>   | <b>&lt;0.05</b> | <b>97</b>    | <b>0.3</b>      | <b>869</b>   | <b>2.4</b>  | <b>1,355</b> | <b>7.9</b>  | <b>2,328</b> | <b>1.3</b> |
| <b>Total skin disease (OSD)</b>   | <b>&lt;0.5</b> | <b>&lt;0.05</b> | <b>1</b>       | <b>&lt;0.05</b> | <b>40</b>      | <b>0.2</b>      | <b>688</b> | <b>1.7</b>      | <b>1,683</b> | <b>5.6</b>      | <b>3,547</b> | <b>10.0</b> | <b>2,687</b> | <b>15.6</b> | <b>8,647</b> | <b>4.8</b> |
| <b>Eye disease (OED):</b>         |                |                 |                |                 |                |                 |            |                 |              |                 |              |             |              |             |              |            |
| Visual impairment                 | <0.5           | <0.05           | <0.5           | <0.05           | <0.5           | <0.05           | 1          | <0.05           | 10           | <0.05           | 122          | 0.3         | 292          | 1.7         | 426          | 0.2        |
| Blindness                         | <0.5           | <0.05           | <0.5           | <0.05           | <0.5           | <0.05           | <0.5       | <0.05           | 3            | <0.05           | 40           | 0.1         | 83           | 0.5         | 126          | 0.1        |
| <b>Eye disease (OED)</b>          | <b>&lt;0.5</b> | <b>&lt;0.05</b> | <b>&lt;0.5</b> | <b>&lt;0.05</b> | <b>&lt;0.5</b> | <b>&lt;0.05</b> | <b>1</b>   | <b>&lt;0.05</b> | <b>13</b>    | <b>&lt;0.05</b> | <b>162</b>   | <b>0.5</b>  | <b>376</b>   | <b>2.2</b>  | <b>552</b>   | <b>0.3</b> |
| <b>Total all manifestations</b>   | <b>&lt;0.5</b> | <b>&lt;0.05</b> | <b>1</b>       | <b>&lt;0.05</b> | <b>40</b>      | <b>0.2</b>      | <b>688</b> | <b>1.7</b>      | <b>1,696</b> | <b>5.7</b>      | <b>3,710</b> | <b>10.5</b> | <b>3,063</b> | <b>17.8</b> | <b>9,198</b> | <b>5.1</b> |

Note: Total skin disease (OSD) is defined as the sum of the number of cases with palpable nodules as well as reversible and irreversible skin disease.

Table L: Population at risk and number of cases in **males** stratified by age for 2020. Absolute numbers (N and DALYs) are presented in thousands.

| Age category:                     | 0-1            |                 | 2-4            |                 | 5-9            |                 | 10-19      |                 | 20-29        |            | 30-49        |             | 50+          |             | Total        |            |
|-----------------------------------|----------------|-----------------|----------------|-----------------|----------------|-----------------|------------|-----------------|--------------|------------|--------------|-------------|--------------|-------------|--------------|------------|
|                                   | N              | %               | N              | %               | N              | %               | N          | %               | N            | %          | N            | %           | N            | %           | N            | %          |
| Total populaton at risk           | 7,108          | 100             | 9,024          | 100             | 12,471         | 100             | 20,159     | 100             | 14,926       | 100        | 17,837       | 100         | 8,635        | 100         | 90,161       | 100        |
| <b>Infection:</b>                 |                |                 |                |                 |                |                 |            |                 |              |            |              |             |              |             |              |            |
| Mf-positive                       | <0.5           | <0.05           | 5              | 0.1             | 170            | 1.4             | 1,517      | 7.5             | 2,118        | 14.2       | 2,839        | 15.9        | 1,356        | 15.7        | 8,006        | 8.9        |
| Mf-positive (age 5+)              | <0.5           | <0.05           | <0.5           | <0.05           | 170            | 1.4             | 1,517      | 7.5             | 2,118        | 14.2       | 2,839        | 15.9        | 1,356        | 15.7        | 8,000        | 8.9        |
| Worm infected                     | 1              | <0.05           | 80             | 0.9             | 644            | 5.2             | 3,120      | 15.5            | 3,691        | 24.7       | 4,909        | 27.5        | 2,357        | 27.3        | 14,802       | 16.4       |
| <b>Clinical manifestations:</b>   |                |                 |                |                 |                |                 |            |                 |              |            |              |             |              |             |              |            |
| Palpable nodules                  | <0.5           | <0.05           | 1              | <0.05           | 23             | 0.2             | 318        | 1.6             | 617          | 4.1        | 905          | 5.1         | 424          | 4.9         | 2,288        | 2.5        |
| <b>Reversible skin disease:</b>   |                |                 |                |                 |                |                 |            |                 |              |            |              |             |              |             |              |            |
| Severe itch                       | <0.5           | <0.05           | <0.5           | <0.05           | 1              | <0.05           | 62         | 0.3             | 212          | 1.4        | 477          | 2.7         | 261          | 3.0         | 1,013        | 1.1        |
| Reactive skin disease             | <0.5           | <0.05           | <0.5           | <0.05           | 1              | <0.05           | 43         | 0.2             | 136          | 0.9        | 231          | 1.3         | 116          | 1.3         | 527          | 0.6        |
| <b>Reversible skin disease</b>    | <b>&lt;0.5</b> | <b>&lt;0.05</b> | <b>&lt;0.5</b> | <b>&lt;0.05</b> | <b>2</b>       | <b>&lt;0.05</b> | <b>106</b> | <b>0.5</b>      | <b>348</b>   | <b>2.3</b> | <b>708</b>   | <b>4.0</b>  | <b>376</b>   | <b>4.4</b>  | <b>1,540</b> | <b>1.7</b> |
| <b>Irreversible skin disease:</b> |                |                 |                |                 |                |                 |            |                 |              |            |              |             |              |             |              |            |
| Mild depigmentation               | <0.5           | <0.05           | <0.5           | <0.05           | <0.5           | <0.05           | 4          | <0.05           | 39           | 0.3        | 278          | 1.6         | 336          | 3.9         | 656          | 0.7        |
| Severe depigmentation             | <0.5           | <0.05           | <0.5           | <0.05           | <0.5           | <0.05           | 1          | <0.05           | 22           | 0.1        | 258          | 1.4         | 450          | 5.2         | 731          | 0.8        |
| Atrophy                           | <0.5           | <0.05           | <0.5           | <0.05           | <0.5           | <0.05           | <0.5       | <0.05           | 2            | <0.05      | <0.5         | <0.05       | <0.5         | <0.05       | 2            | <0.05      |
| Hanging groin                     | <0.5           | <0.05           | <0.5           | <0.05           | <0.5           | <0.05           | <0.5       | <0.05           | <0.5         | <0.05      | 3            | <0.05       | 17           | 0.2         | 19           | <0.05      |
| <b>Irreversible skin disease</b>  | <b>&lt;0.5</b> | <b>&lt;0.05</b> | <b>&lt;0.5</b> | <b>&lt;0.05</b> | <b>&lt;0.5</b> | <b>&lt;0.05</b> | <b>5</b>   | <b>&lt;0.05</b> | <b>63</b>    | <b>0.4</b> | <b>538</b>   | <b>3.0</b>  | <b>802</b>   | <b>9.3</b>  | <b>1,409</b> | <b>1.6</b> |
| <b>Total skin disease (OSD)</b>   | <b>&lt;0.5</b> | <b>&lt;0.05</b> | <b>1</b>       | <b>&lt;0.05</b> | <b>25</b>      | <b>0.2</b>      | <b>429</b> | <b>2.1</b>      | <b>1,028</b> | <b>6.9</b> | <b>2,151</b> | <b>12.1</b> | <b>1,602</b> | <b>18.6</b> | <b>5,236</b> | <b>5.8</b> |
| <b>Eye disease (OED):</b>         |                |                 |                |                 |                |                 |            |                 |              |            |              |             |              |             |              |            |
| Visual impairment                 | <0.5           | <0.05           | <0.5           | <0.05           | <0.5           | <0.05           | <0.5       | <0.05           | 7            | <0.05      | 82           | 0.5         | 181          | 2.1         | 271          | 0.3        |
| Blindness                         | <0.5           | <0.05           | <0.5           | <0.05           | <0.5           | <0.05           | <0.5       | <0.05           | 2            | <0.05      | 29           | 0.2         | 56           | 0.6         | 87           | 0.1        |
| <b>Eye disease (OED)</b>          | <b>&lt;0.5</b> | <b>&lt;0.05</b> | <b>&lt;0.5</b> | <b>&lt;0.05</b> | <b>&lt;0.5</b> | <b>&lt;0.05</b> | <b>1</b>   | <b>&lt;0.05</b> | <b>9</b>     | <b>0.1</b> | <b>110</b>   | <b>0.6</b>  | <b>238</b>   | <b>2.8</b>  | <b>358</b>   | <b>0.4</b> |
| <b>Total all manifestations</b>   | <b>&lt;0.5</b> | <b>&lt;0.05</b> | <b>1</b>       | <b>&lt;0.05</b> | <b>25</b>      | <b>0.2</b>      | <b>430</b> | <b>2.1</b>      | <b>1,037</b> | <b>6.9</b> | <b>2,261</b> | <b>12.7</b> | <b>1,840</b> | <b>21.3</b> | <b>5,594</b> | <b>6.2</b> |

Note: Total skin disease (OSD) is defined as the sum of the number of cases with palpable nodules as well as reversible and irreversible skin disease.

Table M: Population at risk and number of cases in **females** stratified by age for 2020. Absolute numbers (N and DALYs) are presented in thousands.

| Age category:                     | 0-1            |                 | 2-4            |                 | 5-9            |                 | 10-19          |                 | 20-29      |                 | 30-49        |            | 50+          |             | Total        |            |
|-----------------------------------|----------------|-----------------|----------------|-----------------|----------------|-----------------|----------------|-----------------|------------|-----------------|--------------|------------|--------------|-------------|--------------|------------|
|                                   | N              | %               | N              | %               | N              | %               | N              | %               | N          | %               | N            | %          | N            | %           | N            | %          |
| Total populaton at risk           | 7,105          | 100             | 9,031          | 100             | 12,471         | 100             | 20,094         | 100             | 14,895     | 100             | 17,660       | 100        | 8,587        | 100         | 89,843       | 100        |
| <b>Infection:</b>                 |                |                 |                |                 |                |                 |                |                 |            |                 |              |            |              |             |              |            |
| Mf-positive                       | <0.5           | <0.05           | 3              | <0.05           | 98             | 0.8             | 1,053          | 5.2             | 1,637      | 11.0            | 2,218        | 12.6       | 1,077        | 12.5        | 6,086        | 6.8        |
| Mf-positive (age 5+)              | <0.5           | <0.05           | <0.5           | <0.05           | 98             | 0.8             | 1,053          | 5.2             | 1,637      | 11.0            | 2,218        | 12.6       | 1,077        | 12.5        | 6,083        | 6.8        |
| Worm infected                     | 1              | <0.05           | 58             | 0.6             | 475            | 3.8             | 2,499          | 12.4            | 3,101      | 20.8            | 4,130        | 23.4       | 2,006        | 23.4        | 12,270       | 13.7       |
| <b>Clinical manifestations:</b>   |                |                 |                |                 |                |                 |                |                 |            |                 |              |            |              |             |              |            |
| Palpable nodules                  | <0.5           | <0.05           | <0.5           | <0.05           | 13             | 0.1             | 199            | 1.0             | 408        | 2.7             | 612          | 3.5        | 290          | 3.4         | 1,522        | 1.7        |
| <b>Reversible skin disease:</b>   |                |                 |                |                 |                |                 |                |                 |            |                 |              |            |              |             |              |            |
| Severe itch                       | <0.5           | <0.05           | <0.5           | <0.05           | 1              | <0.05           | 34             | 0.2             | 133        | 0.9             | 310          | 1.8        | 172          | 2.0         | 650          | 0.7        |
| Reactive skin disease             | <0.5           | <0.05           | <0.5           | <0.05           | 1              | <0.05           | 24             | 0.1             | 80         | 0.5             | 143          | 0.8        | 71           | 0.8         | 318          | 0.4        |
| <b>Reversible skin disease</b>    | <b>&lt;0.5</b> | <b>&lt;0.05</b> | <b>&lt;0.5</b> | <b>&lt;0.05</b> | <b>1</b>       | <b>&lt;0.05</b> | <b>57</b>      | <b>0.3</b>      | <b>213</b> | <b>1.4</b>      | <b>453</b>   | <b>2.6</b> | <b>243</b>   | <b>2.8</b>  | <b>968</b>   | <b>1.1</b> |
| <b>Irreversible skin disease:</b> |                |                 |                |                 |                |                 |                |                 |            |                 |              |            |              |             |              |            |
| Mild depigmentation               | <0.5           | <0.05           | <0.5           | <0.05           | <0.5           | <0.05           | 2              | <0.05           | 23         | 0.2             | 184          | 1.0        | 252          | 2.9         | 461          | 0.5        |
| Severe depigmentation             | <0.5           | <0.05           | <0.5           | <0.05           | <0.5           | <0.05           | 1              | <0.05           | 10         | 0.1             | 147          | 0.8        | 293          | 3.4         | 450          | 0.5        |
| Atrophy                           | <0.5           | <0.05           | <0.5           | <0.05           | <0.5           | <0.05           | <0.5           | <0.05           | 1          | <0.05           | <0.5         | <0.05      | <0.5         | <0.05       | 1            | <0.05      |
| Hanging groin                     | <0.5           | <0.05           | <0.5           | <0.05           | <0.5           | <0.05           | <0.5           | <0.05           | <0.5       | <0.05           | 1            | <0.05      | 7            | 0.1         | 8            | <0.05      |
| <b>Irreversible skin disease</b>  | <b>&lt;0.5</b> | <b>&lt;0.05</b> | <b>&lt;0.5</b> | <b>&lt;0.05</b> | <b>&lt;0.5</b> | <b>&lt;0.05</b> | <b>3</b>       | <b>&lt;0.05</b> | <b>34</b>  | <b>0.2</b>      | <b>331</b>   | <b>1.9</b> | <b>552</b>   | <b>6.4</b>  | <b>920</b>   | <b>1.0</b> |
| <b>Total skin disease (OSD)</b>   | <b>&lt;0.5</b> | <b>&lt;0.05</b> | <b>&lt;0.5</b> | <b>&lt;0.05</b> | <b>15</b>      | <b>0.1</b>      | <b>259</b>     | <b>1.3</b>      | <b>655</b> | <b>4.4</b>      | <b>1,396</b> | <b>7.9</b> | <b>1,085</b> | <b>12.6</b> | <b>3,410</b> | <b>3.8</b> |
| <b>Eye disease (OED):</b>         |                |                 |                |                 |                |                 |                |                 |            |                 |              |            |              |             |              |            |
| Visual impairment                 | <0.5           | <0.05           | <0.5           | <0.05           | <0.5           | <0.05           | <0.5           | <0.05           | 3          | <0.05           | 41           | 0.2        | 111          | 1.3         | 155          | 0.2        |
| Blindness                         | <0.5           | <0.05           | <0.5           | <0.05           | <0.5           | <0.05           | <0.5           | <0.05           | 1          | <0.05           | 11           | 0.1        | 27           | 0.3         | 39           | <0.05      |
| <b>Eye disease (OED)</b>          | <b>&lt;0.5</b> | <b>&lt;0.05</b> | <b>&lt;0.5</b> | <b>&lt;0.05</b> | <b>&lt;0.5</b> | <b>&lt;0.05</b> | <b>&lt;0.5</b> | <b>&lt;0.05</b> | <b>4</b>   | <b>&lt;0.05</b> | <b>52</b>    | <b>0.3</b> | <b>138</b>   | <b>1.6</b>  | <b>194</b>   | <b>0.2</b> |
| <b>Total all manifestations</b>   | <b>&lt;0.5</b> | <b>&lt;0.05</b> | <b>&lt;0.5</b> | <b>&lt;0.05</b> | <b>15</b>      | <b>0.1</b>      | <b>259</b>     | <b>1.3</b>      | <b>659</b> | <b>4.4</b>      | <b>1,448</b> | <b>8.2</b> | <b>1,223</b> | <b>14.2</b> | <b>3,604</b> | <b>4.0</b> |

Note: Total skin disease (OSD) is defined as the sum of the number of cases with palpable nodules as well as reversible and irreversible skin disease.



Table N: Population at risk and number of cases stratified by age (males and females combined) for 2030. Absolute numbers (N and DALYs) are presented in thousands.

| Age category:                     | 0-1            |                 | 2-4            |                 | 5-9            |                 | 10-19          |                 | 20-29      |                 | 30-49        |            | 50+          |            | Total        |            |
|-----------------------------------|----------------|-----------------|----------------|-----------------|----------------|-----------------|----------------|-----------------|------------|-----------------|--------------|------------|--------------|------------|--------------|------------|
|                                   | N              | %               | N              | %               | N              | %               | N              | %               | N          | %               | N            | %          | N            | %          | N            | %          |
| Total populaton at risk           | 18,628         | 100             | 23,651         | 100             | 32,719         | 100             | 52,772         | 100             | 39,090     | 100             | 46,560       | 100        | 22,683       | 100        | 236,102      | 100        |
| <b>Infection:</b>                 |                |                 |                |                 |                |                 |                |                 |            |                 |              |            |              |            |              |            |
| Mf-positive                       | <0.5           | <0.05           | 1              | <0.05           | 56             | 0.2             | 1,015          | 1.9             | 1,859      | 4.8             | 2,624        | 5.6        | 1,257        | 5.5        | 6,813        | 2.9        |
| Mf-positive (age 5+)              | <0.5           | <0.05           | <0.5           | <0.05           | 56             | 0.2             | 1,015          | 1.9             | 1,859      | 4.8             | 2,624        | 5.6        | 1,257        | 5.5        | 6,812        | 2.9        |
| Worm infected                     | 1              | <0.05           | 43             | 0.2             | 471            | 1.4             | 3,076          | 5.8             | 4,012      | 10.3            | 5,375        | 11.5       | 2,598        | 11.5       | 15,577       | 6.6        |
| <b>Clinical manifestations:</b>   |                |                 |                |                 |                |                 |                |                 |            |                 |              |            |              |            |              |            |
| Palpable nodules                  | <0.5           | <0.05           | <0.5           | <0.05           | 8              | <0.05           | 161            | 0.3             | 377        | 1.0             | 588          | 1.3        | 279          | 1.2        | 1,412        | 0.6        |
| <b>Reversible skin disease:</b>   |                |                 |                |                 |                |                 |                |                 |            |                 |              |            |              |            |              |            |
| Severe itch                       | <0.5           | <0.05           | <0.5           | <0.05           | <0.5           | <0.05           | 14             | <0.05           | 89         | 0.2             | 277          | 0.6        | 162          | 0.7        | 542          | 0.2        |
| Reactive skin disease             | <0.5           | <0.05           | <0.5           | <0.05           | <0.5           | <0.05           | 7              | <0.05           | 28         | 0.1             | 62           | 0.1        | 31           | 0.1        | 129          | 0.1        |
| <b>Reversible skin disease</b>    | <b>&lt;0.5</b> | <b>&lt;0.05</b> | <b>&lt;0.5</b> | <b>&lt;0.05</b> | <b>&lt;0.5</b> | <b>&lt;0.05</b> | <b>21</b>      | <b>&lt;0.05</b> | <b>117</b> | <b>0.3</b>      | <b>339</b>   | <b>0.7</b> | <b>193</b>   | <b>0.9</b> | <b>670</b>   | <b>0.3</b> |
| <b>Irreversible skin disease:</b> |                |                 |                |                 |                |                 |                |                 |            |                 |              |            |              |            |              |            |
| Mild depigmentation               | <0.5           | <0.05           | <0.5           | <0.05           | <0.5           | <0.05           | 1              | <0.05           | 20         | 0.1             | 266          | 0.6        | 591          | 2.6        | 879          | 0.4        |
| Severe depigmentation             | <0.5           | <0.05           | <0.5           | <0.05           | <0.5           | <0.05           | <0.5           | <0.05           | 8          | <0.05           | 185          | 0.4        | 669          | 2.9        | 863          | 0.4        |
| Atrophy                           | <0.5           | <0.05           | <0.5           | <0.05           | <0.5           | <0.05           | <0.5           | <0.05           | <0.5       | <0.05           | <0.5         | <0.05      | <0.5         | <0.05      | <0.5         | <0.05      |
| Hanging groin                     | <0.5           | <0.05           | <0.5           | <0.05           | <0.5           | <0.05           | <0.5           | <0.05           | <0.5       | <0.05           | 1            | <0.05      | 14           | 0.1        | 15           | <0.05      |
| <b>Irreversible skin disease</b>  | <b>&lt;0.5</b> | <b>&lt;0.05</b> | <b>&lt;0.5</b> | <b>&lt;0.05</b> | <b>&lt;0.5</b> | <b>&lt;0.05</b> | <b>1</b>       | <b>&lt;0.05</b> | <b>29</b>  | <b>0.1</b>      | <b>452</b>   | <b>1.0</b> | <b>1,274</b> | <b>5.6</b> | <b>1,756</b> | <b>0.7</b> |
| <b>Total skin disease (OSD)</b>   | <b>&lt;0.5</b> | <b>&lt;0.05</b> | <b>&lt;0.5</b> | <b>&lt;0.05</b> | <b>8</b>       | <b>&lt;0.05</b> | <b>183</b>     | <b>0.3</b>      | <b>523</b> | <b>1.3</b>      | <b>1,380</b> | <b>3.0</b> | <b>1,745</b> | <b>7.7</b> | <b>3,839</b> | <b>1.6</b> |
| <b>Eye disease (OED):</b>         |                |                 |                |                 |                |                 |                |                 |            |                 |              |            |              |            |              |            |
| Visual impairment                 | <0.5           | <0.05           | <0.5           | <0.05           | <0.5           | <0.05           | <0.5           | <0.05           | 4          | <0.05           | 67           | 0.1        | 245          | 1.1        | 316          | 0.1        |
| Blindness                         | <0.5           | <0.05           | <0.5           | <0.05           | <0.5           | <0.05           | <0.5           | <0.05           | <0.5       | <0.05           | 16           | <0.05      | 52           | 0.2        | 69           | <0.05      |
| <b>Eye disease (OED)</b>          | <b>&lt;0.5</b> | <b>&lt;0.05</b> | <b>&lt;0.5</b> | <b>&lt;0.05</b> | <b>&lt;0.5</b> | <b>&lt;0.05</b> | <b>&lt;0.5</b> | <b>&lt;0.05</b> | <b>5</b>   | <b>&lt;0.05</b> | <b>83</b>    | <b>0.2</b> | <b>297</b>   | <b>1.3</b> | <b>384</b>   | <b>0.2</b> |
| <b>Total all manifestations</b>   | <b>&lt;0.5</b> | <b>&lt;0.05</b> | <b>&lt;0.5</b> | <b>&lt;0.05</b> | <b>8</b>       | <b>&lt;0.05</b> | <b>183</b>     | <b>0.3</b>      | <b>527</b> | <b>1.3</b>      | <b>1,463</b> | <b>3.1</b> | <b>2,042</b> | <b>9.0</b> | <b>4,223</b> | <b>1.8</b> |

Note: Total skin disease (OSD) is defined as the sum of the number of cases with palpable nodules as well as reversible and irreversible skin disease.

Table O: Population at risk and number of cases in **males** stratified by age for 2030. Absolute numbers (N and DALYs) are presented in thousands.

| Age category:                     | 0-1            |                 | 2-4            |                 | 5-9            |                 | 10-19          |                 | 20-29      |                 | 30-49      |            | 50+          |             | Total        |            |
|-----------------------------------|----------------|-----------------|----------------|-----------------|----------------|-----------------|----------------|-----------------|------------|-----------------|------------|------------|--------------|-------------|--------------|------------|
|                                   | N              | %               | N              | %               | N              | %               | N              | %               | N          | %               | N          | %          | N            | %           | N            | %          |
| Total populaton at risk           | 9,330          | 100             | 11,846         | 100             | 16,356         | 100             | 26,393         | 100             | 19,606     | 100             | 23,369     | 100        | 11,393       | 100         | 118,294      | 100        |
| <b>Infection:</b>                 |                |                 |                |                 |                |                 |                |                 |            |                 |            |            |              |             |              |            |
| Mf-positive                       | <0.5           | <0.05           | 1              | <0.05           | 37             | 0.2             | 621            | 2.4             | 1,098      | 5.6             | 1,517      | 6.5        | 732          | 6.4         | 4,006        | 3.4        |
| Mf-positive (age 5+)              | <0.5           | <0.05           | <0.5           | <0.05           | 37             | 0.2             | 621            | 2.4             | 1,098      | 5.6             | 1,517      | 6.5        | 732          | 6.4         | 4,005        | 3.4        |
| Worm infected                     | 1              | <0.05           | 26             | 0.2             | 271            | 1.7             | 1,736          | 6.6             | 2,217      | 11.3            | 2,940      | 12.6       | 1,427        | 12.5        | 8,618        | 7.3        |
| <b>Clinical manifestations:</b>   |                |                 |                |                 |                |                 |                |                 |            |                 |            |            |              |             |              |            |
| Palpable nodules                  | <0.5           | <0.05           | <0.5           | <0.05           | 5              | <0.05           | 101            | 0.4             | 233        | 1.2             | 361        | 1.5        | 172          | 1.5         | 871          | 0.7        |
| <b>Reversible skin disease:</b>   |                |                 |                |                 |                |                 |                |                 |            |                 |            |            |              |             |              |            |
| Severe itch                       | <0.5           | <0.05           | <0.5           | <0.05           | <0.5           | <0.05           | 9              | <0.05           | 58         | 0.3             | 176        | 0.8        | 100          | 0.9         | 344          | 0.3        |
| Reactive skin disease             | <0.5           | <0.05           | <0.5           | <0.05           | <0.5           | <0.05           | 5              | <0.05           | 19         | 0.1             | 41         | 0.2        | 21           | 0.2         | 86           | 0.1        |
| <b>Reversible skin disease</b>    | <b>&lt;0.5</b> | <b>&lt;0.05</b> | <b>&lt;0.5</b> | <b>&lt;0.05</b> | <b>&lt;0.5</b> | <b>&lt;0.05</b> | <b>14</b>      | <b>0.1</b>      | <b>77</b>  | <b>0.4</b>      | <b>217</b> | <b>0.9</b> | <b>121</b>   | <b>1.1</b>  | <b>429</b>   | <b>0.4</b> |
| <b>Irreversible skin disease:</b> |                |                 |                |                 |                |                 |                |                 |            |                 |            |            |              |             |              |            |
| Mild depigmentation               | <0.5           | <0.05           | <0.5           | <0.05           | <0.5           | <0.05           | 1              | <0.05           | 13         | 0.1             | 162        | 0.7        | 342          | 3.0         | 518          | 0.4        |
| Severe depigmentation             | <0.5           | <0.05           | <0.5           | <0.05           | <0.5           | <0.05           | <0.5           | <0.05           | 6          | <0.05           | 120        | 0.5        | 412          | 3.6         | 537          | 0.5        |
| Atrophy                           | <0.5           | <0.05           | <0.5           | <0.05           | <0.5           | <0.05           | <0.5           | <0.05           | <0.5       | <0.05           | <0.5       | <0.05      | <0.5         | <0.05       | <0.5         | <0.05      |
| Hanging groin                     | <0.5           | <0.05           | <0.5           | <0.05           | <0.5           | <0.05           | <0.5           | <0.05           | <0.5       | <0.05           | 1          | <0.05      | 10           | 0.1         | 11           | <0.05      |
| <b>Irreversible skin disease</b>  | <b>&lt;0.5</b> | <b>&lt;0.05</b> | <b>&lt;0.5</b> | <b>&lt;0.05</b> | <b>&lt;0.5</b> | <b>&lt;0.05</b> | <b>1</b>       | <b>&lt;0.05</b> | <b>19</b>  | <b>0.1</b>      | <b>283</b> | <b>1.2</b> | <b>764</b>   | <b>6.7</b>  | <b>1,067</b> | <b>0.9</b> |
| <b>Total skin disease (OSD)</b>   | <b>&lt;0.5</b> | <b>&lt;0.05</b> | <b>&lt;0.5</b> | <b>&lt;0.05</b> | <b>5</b>       | <b>&lt;0.05</b> | <b>116</b>     | <b>0.4</b>      | <b>329</b> | <b>1.7</b>      | <b>861</b> | <b>3.7</b> | <b>1,057</b> | <b>9.3</b>  | <b>2,367</b> | <b>2.0</b> |
| <b>Eye disease (OED):</b>         |                |                 |                |                 |                |                 |                |                 |            |                 |            |            |              |             |              |            |
| Visual impairment                 | <0.5           | <0.05           | <0.5           | <0.05           | <0.5           | <0.05           | <0.5           | <0.05           | 3          | <0.05           | 44         | 0.2        | 155          | 1.4         | 201          | 0.2        |
| Blindness                         | <0.5           | <0.05           | <0.5           | <0.05           | <0.5           | <0.05           | <0.5           | <0.05           | <0.5       | <0.05           | 12         | <0.05      | 36           | 0.3         | 48           | <0.05      |
| <b>Eye disease (OED)</b>          | <b>&lt;0.5</b> | <b>&lt;0.05</b> | <b>&lt;0.5</b> | <b>&lt;0.05</b> | <b>&lt;0.5</b> | <b>&lt;0.05</b> | <b>&lt;0.5</b> | <b>&lt;0.05</b> | <b>3</b>   | <b>&lt;0.05</b> | <b>55</b>  | <b>0.2</b> | <b>191</b>   | <b>1.7</b>  | <b>249</b>   | <b>0.2</b> |
| <b>Total all manifestations</b>   | <b>&lt;0.5</b> | <b>&lt;0.05</b> | <b>&lt;0.5</b> | <b>&lt;0.05</b> | <b>5</b>       | <b>&lt;0.05</b> | <b>116</b>     | <b>0.4</b>      | <b>332</b> | <b>1.7</b>      | <b>916</b> | <b>3.9</b> | <b>1,248</b> | <b>11.0</b> | <b>2,617</b> | <b>2.2</b> |

Note: Total skin disease (OSD) is defined as the sum of the number of cases with palpable nodules as well as reversible and irreversible skin disease.

Table P: Population at risk and number of cases in **females** stratified by age for 2030. Absolute numbers (N and DALYs) are presented in thousands.

| Age category:                     | 0-1            |                 | 2-4            |                 | 5-9            |                 | 10-19          |                 | 20-29      |                 | 30-49      |            | 50+        |            | Total        |            |
|-----------------------------------|----------------|-----------------|----------------|-----------------|----------------|-----------------|----------------|-----------------|------------|-----------------|------------|------------|------------|------------|--------------|------------|
|                                   | N              | %               | N              | %               | N              | %               | N              | %               | N          | %               | N          | %          | N          | %          | N            | %          |
| Total populaton at risk           | 9,298          | 100             | 11,805         | 100             | 16,363         | 100             | 26,378         | 100             | 19,484     | 100             | 23,191     | 100        | 11,290     | 100        | 117,808      | 100        |
| <b>Infection:</b>                 |                |                 |                |                 |                |                 |                |                 |            |                 |            |            |            |            |              |            |
| Mf-positive                       | <0.5           | <0.05           | <0.5           | <0.05           | 20             | 0.1             | 394            | 1.5             | 761        | 3.9             | 1,106      | 4.8        | 525        | 4.7        | 2,807        | 2.4        |
| Mf-positive (age 5+)              | <0.5           | <0.05           | <0.5           | <0.05           | 20             | 0.1             | 394            | 1.5             | 761        | 3.9             | 1,106      | 4.8        | 525        | 4.7        | 2,807        | 2.4        |
| Worm infected                     | <0.5           | <0.05           | 17             | 0.1             | 200            | 1.2             | 1,341          | 5.1             | 1,795      | 9.2             | 2,435      | 10.5       | 1,171      | 10.4       | 6,958        | 5.9        |
| <b>Clinical manifestations:</b>   |                |                 |                |                 |                |                 |                |                 |            |                 |            |            |            |            |              |            |
| Palpable nodules                  | <0.5           | <0.05           | <0.5           | <0.05           | 3              | <0.05           | 60             | 0.2             | 144        | 0.7             | 227        | 1.0        | 107        | 0.9        | 541          | 0.5        |
| <b>Reversible skin disease:</b>   |                |                 |                |                 |                |                 |                |                 |            |                 |            |            |            |            |              |            |
| Severe itch                       | <0.5           | <0.05           | <0.5           | <0.05           | <0.5           | <0.05           | 5              | <0.05           | 31         | 0.2             | 101        | 0.4        | 62         | 0.5        | 198          | 0.2        |
| Reactive skin disease             | <0.5           | <0.05           | <0.5           | <0.05           | <0.5           | <0.05           | 2              | <0.05           | 9          | <0.05           | 22         | 0.1        | 10         | 0.1        | 43           | <0.05      |
| <b>Reversible skin disease</b>    | <b>&lt;0.5</b> | <b>&lt;0.05</b> | <b>&lt;0.5</b> | <b>&lt;0.05</b> | <b>&lt;0.5</b> | <b>&lt;0.05</b> | <b>7</b>       | <b>&lt;0.05</b> | <b>40</b>  | <b>0.2</b>      | <b>122</b> | <b>0.5</b> | <b>72</b>  | <b>0.6</b> | <b>241</b>   | <b>0.2</b> |
| <b>Irreversible skin disease:</b> |                |                 |                |                 |                |                 |                |                 |            |                 |            |            |            |            |              |            |
| Mild depigmentation               | <0.5           | <0.05           | <0.5           | <0.05           | <0.5           | <0.05           | <0.5           | <0.05           | 7          | <0.05           | 104        | 0.4        | 249        | 2.2        | 360          | 0.3        |
| Severe depigmentation             | <0.5           | <0.05           | <0.5           | <0.05           | <0.5           | <0.05           | <0.5           | <0.05           | 3          | <0.05           | 65         | 0.3        | 257        | 2.3        | 325          | 0.3        |
| Atrophy                           | <0.5           | <0.05           | <0.5           | <0.05           | <0.5           | <0.05           | <0.5           | <0.05           | <0.5       | <0.05           | <0.5       | <0.05      | <0.5       | <0.05      | <0.5         | <0.05      |
| Hanging groin                     | <0.5           | <0.05           | <0.5           | <0.05           | <0.5           | <0.05           | <0.5           | <0.05           | <0.5       | <0.05           | <0.5       | <0.05      | 4          | <0.05      | 4            | <0.05      |
| <b>Irreversible skin disease</b>  | <b>&lt;0.5</b> | <b>&lt;0.05</b> | <b>&lt;0.5</b> | <b>&lt;0.05</b> | <b>&lt;0.5</b> | <b>&lt;0.05</b> | <b>&lt;0.5</b> | <b>&lt;0.05</b> | <b>10</b>  | <b>0.1</b>      | <b>170</b> | <b>0.7</b> | <b>510</b> | <b>4.5</b> | <b>689</b>   | <b>0.6</b> |
| <b>Total skin disease (OSD)</b>   | <b>&lt;0.5</b> | <b>&lt;0.05</b> | <b>&lt;0.5</b> | <b>&lt;0.05</b> | <b>3</b>       | <b>&lt;0.05</b> | <b>67</b>      | <b>0.3</b>      | <b>194</b> | <b>1.0</b>      | <b>519</b> | <b>2.2</b> | <b>688</b> | <b>6.1</b> | <b>1,472</b> | <b>1.2</b> |
| <b>Eye disease (OED):</b>         |                |                 |                |                 |                |                 |                |                 |            |                 |            |            |            |            |              |            |
| Visual impairment                 | <0.5           | <0.05           | <0.5           | <0.05           | <0.5           | <0.05           | <0.5           | <0.05           | 1          | <0.05           | 23         | 0.1        | 90         | 0.8        | 114          | 0.1        |
| Blindness                         | <0.5           | <0.05           | <0.5           | <0.05           | <0.5           | <0.05           | <0.5           | <0.05           | <0.5       | <0.05           | 5          | <0.05      | 16         | 0.1        | 21           | <0.05      |
| <b>Eye disease (OED)</b>          | <b>&lt;0.5</b> | <b>&lt;0.05</b> | <b>&lt;0.5</b> | <b>&lt;0.05</b> | <b>&lt;0.5</b> | <b>&lt;0.05</b> | <b>&lt;0.5</b> | <b>&lt;0.05</b> | <b>1</b>   | <b>&lt;0.05</b> | <b>27</b>  | <b>0.1</b> | <b>106</b> | <b>0.9</b> | <b>135</b>   | <b>0.1</b> |
| <b>Total all manifestations</b>   | <b>&lt;0.5</b> | <b>&lt;0.05</b> | <b>&lt;0.5</b> | <b>&lt;0.05</b> | <b>3</b>       | <b>&lt;0.05</b> | <b>67</b>      | <b>0.3</b>      | <b>195</b> | <b>1.0</b>      | <b>547</b> | <b>2.4</b> | <b>794</b> | <b>7.0</b> | <b>1,607</b> | <b>1.4</b> |

Note: Total skin disease (OSD) is defined as the sum of the number of cases with palpable nodules as well as reversible and irreversible skin disease.

Table Q: Population at risk, number of cases with infection and clinical manifestations, and DALYs lost due to onchocerciasis stratified by endemicity level for 1990. Absolute numbers (N and DALYs) are presented in thousands.

|                                   | Hypoendemic  |            |            | Mesoendemic  |             |            | Hyperendemic |             |            | Very hyperendemic |              |            | Total         |             |              |
|-----------------------------------|--------------|------------|------------|--------------|-------------|------------|--------------|-------------|------------|-------------------|--------------|------------|---------------|-------------|--------------|
|                                   | N            | %          | DALYs      | N            | %           | DALYs      | N            | %           | DALYs      | N                 | %            | DALYs      | N             | %           | DALYs        |
| Total populaton at risk           | 49,274       | 100        | —          | 22,799       | 100         | —          | 6,099        | 100         | —          | 1,595             | 100          | —          | 79,768        | 100         | —            |
| <b>Infection:</b>                 |              |            |            |              |             |            |              |             |            |                   |              |            |               |             |              |
| Mf-positive                       | 10,633       | 21.6       | —          | 10,096       | 44.3        | —          | 4,041        | 66.3        | —          | 1,193             | 74.8         | —          | 25,964        | 32.5        | —            |
| Mf-positive (age 5+)              | 10,627       | 21.6       | —          | 10,087       | 44.2        | —          | 4,026        | 66.0        | —          | 1,182             | 74.1         | —          | 25,922        | 32.5        | —            |
| Worm infected                     | 14,299       | 29.0       | —          | 12,790       | 56.1        | —          | 4,463        | 73.2        | —          | 1,273             | 79.8         | —          | 32,825        | 41.2        | —            |
| <b>Clinical manifestations:</b>   |              |            |            |              |             |            |              |             |            |                   |              |            |               |             |              |
| Palpable nodules                  | 1,117        | 2.3        | 12         | 3,377        | 14.8        | 36         | 2,274        | 37.3        | 24         | 848               | 53.2         | 9          | 7,617         | 9.5         | 81           |
| <b>Reversible skin disease:</b>   |              |            |            |              |             |            |              |             |            |                   |              |            |               |             |              |
| Severe itch                       | 1,313        | 2.7        | 238        | 1,451        | 6.4         | 263        | 973          | 16.0        | 177        | 378               | 23.7         | 69         | 4,115         | 5.2         | 747          |
| Reactive skin disease             | 874          | 1.8        | 40         | 1,025        | 4.5         | 47         | 836          | 13.7        | 39         | 355               | 22.3         | 16         | 3,089         | 3.9         | 143          |
| <b>Reversible skin disease</b>    | <b>2,186</b> | <b>4.4</b> | <b>279</b> | <b>2,477</b> | <b>10.9</b> | <b>311</b> | <b>1,808</b> | <b>29.7</b> | <b>215</b> | <b>733</b>        | <b>46.0</b>  | <b>85</b>  | <b>7,205</b>  | <b>9.0</b>  | <b>890</b>   |
| <b>Irreversible skin disease:</b> |              |            |            |              |             |            |              |             |            |                   |              |            |               |             |              |
| Mild depigmentation               | 358          | 0.7        | 4          | 328          | 1.4         | 3          | 186          | 3.1         | 2          | 63                | 4.0          | 1          | 935           | 1.2         | 10           |
| Severe depigmentation             | 301          | 0.6        | 19         | 321          | 1.4         | 21         | 298          | 4.9         | 19         | 137               | 8.6          | 9          | 1,057         | 1.3         | 68           |
| Atrophy                           | 1            | <0.05      | <0.5       | 2            | <0.05       | <0.5       | 7            | 0.1         | <0.5       | 7                 | 0.4          | <0.5       | 16            | <0.05       | <0.5         |
| Hanging groin                     | 1            | <0.05      | <0.5       | 2            | <0.05       | 1          | 14           | 0.2         | 5          | 16                | 1.0          | 6          | 33            | <0.05       | 13           |
| <b>Irreversible skin disease</b>  | <b>661</b>   | <b>1.3</b> | <b>24</b>  | <b>652</b>   | <b>2.9</b>  | <b>25</b>  | <b>505</b>   | <b>8.3</b>  | <b>27</b>  | <b>223</b>        | <b>14.0</b>  | <b>16</b>  | <b>2,041</b>  | <b>2.6</b>  | <b>91</b>    |
| <b>Total skin disease (OSD)</b>   | <b>3,965</b> | <b>8.0</b> | <b>314</b> | <b>6,506</b> | <b>28.5</b> | <b>372</b> | <b>4,587</b> | <b>75.2</b> | <b>266</b> | <b>1,804</b>      | <b>113.1</b> | <b>110</b> | <b>16,862</b> | <b>21.1</b> | <b>1,062</b> |
| <b>Eye disease (OED):</b>         |              |            |            |              |             |            |              |             |            |                   |              |            |               |             |              |
| Visual impairment                 | 232          | 0.5        | 7          | 113          | 0.5         | 4          | 55           | 0.9         | 2          | 20                | 1.3          | 1          | 421           | 0.5         | 13           |
| Blindness                         | 69           | 0.1        | 465        | 42           | 0.2         | 303        | 51           | 0.8         | 377        | 33                | 2.0          | 252        | 194           | 0.2         | 1,397        |
| <b>Eye disease (OED)</b>          | <b>301</b>   | <b>0.6</b> | <b>472</b> | <b>156</b>   | <b>0.7</b>  | <b>307</b> | <b>106</b>   | <b>1.7</b>  | <b>378</b> | <b>53</b>         | <b>3.3</b>   | <b>252</b> | <b>616</b>    | <b>0.8</b>  | <b>1,410</b> |
| <b>Total all manifestations</b>   | <b>4,266</b> | <b>8.7</b> | <b>786</b> | <b>6,661</b> | <b>29.2</b> | <b>678</b> | <b>4,693</b> | <b>76.9</b> | <b>645</b> | <b>1,857</b>      | <b>116.4</b> | <b>362</b> | <b>17,478</b> | <b>21.9</b> | <b>2,472</b> |

Note: Total skin disease (OSD) is defined as the sum of the number of cases with palpable nodules as well as reversible and irreversible skin disease.

Table R: Population at risk, number of cases with infection and clinical manifestations, and DALYs lost due to onchocerciasis stratified by endemicity level for 2020. Absolute numbers (N and DALYs) are presented in thousands.

|                                   | Hypoendemic  |            |            | Mesoendemic  |            |            | Hyperendemic |             |            | Very hyperendemic |             |            | Total        |            |              |
|-----------------------------------|--------------|------------|------------|--------------|------------|------------|--------------|-------------|------------|-------------------|-------------|------------|--------------|------------|--------------|
|                                   | N            | %          | DALYs      | N            | %          | DALYs      | N            | %           | DALYs      | N                 | %           | DALYs      | N            | %          | DALYs        |
| Total populaton at risk           | 111,193      | 100        | —          | 51,449       | 100        | —          | 13,763       | 100         | —          | 3,599             | 100         | —          | 180,004      | 100        | —            |
| <b>Infection:</b>                 |              |            |            |              |            |            |              |             |            |                   |             |            |              |            |              |
| Mf-positive                       | 6,821        | 6.1        | —          | 3,732        | 7.3        | —          | 2,345        | 17.0        | —          | 1,194             | 33.2        | —          | 14,092       | 7.8        | —            |
| Mf-positive (age 5+)              | 6,818        | 6.1        | —          | 3,730        | 7.2        | —          | 2,343        | 17.0        | —          | 1,193             | 33.2        | —          | 14,084       | 7.8        | —            |
| Worm infected                     | 11,670       | 10.5       | —          | 8,588        | 16.7       | —          | 4,855        | 35.3        | —          | 1,959             | 54.4        | —          | 27,073       | 15.0       | —            |
| <b>Clinical manifestations:</b>   |              |            |            |              |            |            |              |             |            |                   |             |            |              |            |              |
| Palpable nodules                  | 725          | 0.7        | 8          | 1,278        | 2.5        | 14         | 1,138        | 8.3         | 12         | 669               | 18.6        | 7          | 3,810        | 2.1        | 40           |
| <b>Reversible skin disease:</b>   |              |            |            |              |            |            |              |             |            |                   |             |            |              |            |              |
| Severe itch                       | 791          | 0.7        | 144        | 436          | 0.8        | 79         | 301          | 2.2         | 55         | 135               | 3.7         | 24         | 1,663        | 0.9        | 302          |
| Reactive skin disease             | 481          | 0.4        | 22         | 213          | 0.4        | 10         | 114          | 0.8         | 5          | 38                | 1.0         | 2          | 845          | 0.5        | 39           |
| <b>Reversible skin disease</b>    | <b>1,272</b> | <b>1.1</b> | <b>166</b> | <b>649</b>   | <b>1.3</b> | <b>89</b>  | <b>414</b>   | <b>3.0</b>  | <b>60</b>  | <b>172</b>        | <b>4.8</b>  | <b>26</b>  | <b>2,508</b> | <b>1.4</b> | <b>341</b>   |
| <b>Irreversible skin disease:</b> |              |            |            |              |            |            |              |             |            |                   |             |            |              |            |              |
| Mild depigmentation               | 438          | 0.4        | 5          | 371          | 0.7        | 4          | 227          | 1.6         | 2          | 81                | 2.3         | 1          | 1,117        | 0.6        | 12           |
| Severe depigmentation             | 350          | 0.3        | 23         | 339          | 0.7        | 22         | 335          | 2.4         | 22         | 157               | 4.4         | 10         | 1,181        | 0.7        | 76           |
| Atrophy                           | <0.5         | <0.05      | <0.5       | <0.5         | <0.05      | <0.5       | 1            | <0.05       | <0.5       | 1                 | <0.05       | <0.5       | 3            | <0.05      | <0.5         |
| Hanging groin                     | 1            | <0.05      | <0.5       | 1            | <0.05      | 1          | 11           | 0.1         | 4          | 13                | 0.4         | 5          | 27           | <0.05      | 10           |
| <b>Irreversible skin disease</b>  | <b>789</b>   | <b>0.7</b> | <b>28</b>  | <b>712</b>   | <b>1.4</b> | <b>26</b>  | <b>574</b>   | <b>4.2</b>  | <b>29</b>  | <b>253</b>        | <b>7.0</b>  | <b>16</b>  | <b>2,328</b> | <b>1.3</b> | <b>99</b>    |
| <b>Total skin disease (OSD)</b>   | <b>2,787</b> | <b>2.5</b> | <b>201</b> | <b>2,639</b> | <b>5.1</b> | <b>129</b> | <b>2,126</b> | <b>15.5</b> | <b>100</b> | <b>1,094</b>      | <b>30.4</b> | <b>50</b>  | <b>8,647</b> | <b>4.8</b> | <b>480</b>   |
| <b>Eye disease (OED):</b>         |              |            |            |              |            |            |              |             |            |                   |             |            |              |            |              |
| Visual impairment                 | 244          | 0.2        | 8          | 103          | 0.2        | 3          | 55           | 0.4         | 2          | 23                | 0.6         | 1          | 426          | 0.2        | 13           |
| Blindness                         | 51           | <0.05      | 344        | 22           | <0.05      | 159        | 30           | 0.2         | 222        | 23                | 0.6         | 177        | 126          | 0.1        | 903          |
| <b>Eye disease (OED)</b>          | <b>295</b>   | <b>0.3</b> | <b>352</b> | <b>125</b>   | <b>0.2</b> | <b>162</b> | <b>85</b>    | <b>0.6</b>  | <b>224</b> | <b>45</b>         | <b>1.3</b>  | <b>178</b> | <b>552</b>   | <b>0.3</b> | <b>916</b>   |
| <b>Total all manifestations</b>   | <b>3,083</b> | <b>2.8</b> | <b>553</b> | <b>2,764</b> | <b>5.4</b> | <b>291</b> | <b>2,212</b> | <b>16.1</b> | <b>324</b> | <b>1,139</b>      | <b>31.7</b> | <b>228</b> | <b>9,198</b> | <b>5.1</b> | <b>1,397</b> |

Note: Total skin disease (OSD) is defined as the sum of the number of cases with palpable nodules as well as reversible and irreversible skin disease.

Table S: Population at risk, number of cases with infection and clinical manifestations, and DALYs lost due to onchocerciasis by country for 1990. Absolute numbers (N and DALYs) are presented in thousands.

| Country      | Pop. at risk  | Mf-positive   |             | Palpable nodules |            |           | Reversible skin disease |            |            | Irreversible skin disease |            |           | Eye disease (OED) |            |              | Total all manifestations |             |              |
|--------------|---------------|---------------|-------------|------------------|------------|-----------|-------------------------|------------|------------|---------------------------|------------|-----------|-------------------|------------|--------------|--------------------------|-------------|--------------|
|              |               | N             | %           | N                | %          | DALYs     | N                       | %          | DALYs      | N                         | %          | DALYs     | N                 | %          | DALYs        | N                        | %           | DALYs        |
| Angola       | 1,326         | 333           | 25.1        | 55               | 4.2        | 1         | 72                      | 5.4        | 9          | 21                        | 1.6        | 1         | <0.5              | <0.05      | 1            | 148                      | 11.2        | 11           |
| Burundi      | 1,333         | 359           | 26.9        | 68               | 5.1        | 1         | 78                      | 5.9        | 10         | 23                        | 1.7        | 1         | <0.5              | <0.05      | 1            | 169                      | 12.7        | 12           |
| Cameroon     | 5,121         | 2,241         | 43.8        | 934              | 18.2       | 10        | 787                     | 15.4       | 95         | 220                       | 4.3        | 11        | 54                | 1.0        | 161          | 1,995                    | 39.0        | 277          |
| CAR          | 1,316         | 549           | 41.7        | 195              | 14.8       | 2         | 160                     | 12.1       | 20         | 43                        | 3.2        | 2         | 55                | 4.1        | 140          | 452                      | 34.4        | 164          |
| Chad         | 1,277         | 379           | 29.7        | 85               | 6.7        | 1         | 83                      | 6.5        | 10         | 23                        | 1.8        | 1         | 28                | 2.2        | 53           | 219                      | 17.1        | 65           |
| Congo        | 794           | 220           | 27.8        | 46               | 5.8        | <0.5      | 51                      | 6.5        | 6          | 15                        | 1.8        | 1         | <0.5              | <0.05      | 1            | 112                      | 14.1        | 9            |
| DRC          | 23,006        | 9,075         | 39.4        | 3,366            | 14.6       | 36        | 2,963                   | 12.9       | 361        | 843                       | 3.7        | 42        | 70                | 0.3        | 287          | 7,242                    | 31.5        | 726          |
| Eq. Guinea   | 199           | 76            | 38.2        | 35               | 17.7       | <0.5      | 35                      | 17.7       | 4          | 11                        | 5.6        | 1         | 2                 | 1.1        | 11           | 83                       | 42.0        | 16           |
| Ethiopia     | 6,727         | 2,206         | 32.8        | 581              | 8.6        | 6         | 542                     | 8.1        | 68         | 152                       | 2.3        | 6         | 4                 | 0.1        | 12           | 1,279                    | 19.0        | 92           |
| Gabon        | 49            | 11            | 21.6        | 1                | 2.5        | <0.5      | 2                       | 4.3        | <0.5       | 1                         | 1.3        | <0.5      | <0.5              | <0.05      | <0.5         | 4                        | 8.1         | <0.5         |
| Liberia      | 881           | 343           | 39.0        | 100              | 11.3       | 1         | 72                      | 8.2        | 9          | 19                        | 2.1        | 1         | <0.5              | <0.05      | <0.5         | 191                      | 21.7        | 11           |
| Malawi       | 1,172         | 273           | 23.3        | 41               | 3.5        | <0.5      | 54                      | 4.6        | 7          | 16                        | 1.4        | 1         | <0.5              | <0.05      | <0.5         | 111                      | 9.5         | 8            |
| Mozambique   | 36            | 7             | 20.0        | 1                | 2.0        | <0.5      | 1                       | 3.9        | <0.5       | <0.5                      | 1.2        | <0.5      | <0.5              | <0.05      | <0.5         | 3                        | 7.2         | <0.5         |
| Nigeria      | 28,322        | 7,352         | 26.0        | 1,430            | 5.0        | 15        | 1,638                   | 5.8        | 207        | 468                       | 1.7        | 17        | 296               | 1.0        | 505          | 3,832                    | 13.5        | 744          |
| South Sudan  | 3,849         | 1,122         | 29.1        | 270              | 7.0        | 3         | 262                     | 6.8        | 33         | 73                        | 1.9        | 3         | 93                | 2.4        | 202          | 698                      | 18.1        | 241          |
| Sudan        | 366           | 79            | 21.6        | 9                | 2.4        | <0.5      | 16                      | 4.3        | 2          | 5                         | 1.3        | <0.5      | 6                 | 1.6        | 9            | 35                       | 9.6         | 12           |
| Tanzania     | 1,839         | 631           | 34.3        | 189              | 10.3       | 2         | 180                     | 9.8        | 22         | 51                        | 2.8        | 2         | 3                 | 0.2        | 11           | 423                      | 23.0        | 38           |
| Uganda       | 2,155         | 708           | 32.9        | 209              | 9.7        | 2         | 207                     | 9.6        | 25         | 60                        | 2.8        | 3         | 4                 | 0.2        | 15           | 480                      | 22.3        | 45           |
| <b>Total</b> | <b>79,768</b> | <b>25,964</b> | <b>32.5</b> | <b>7,617</b>     | <b>9.5</b> | <b>81</b> | <b>7,205</b>            | <b>9.0</b> | <b>890</b> | <b>2,041</b>              | <b>2.6</b> | <b>91</b> | <b>616</b>        | <b>0.8</b> | <b>1,410</b> | <b>17,478</b>            | <b>21.9</b> | <b>2,472</b> |

Table T: Population at risk, number of cases with infection and clinical manifestations, and DALYs lost due to onchocerciasis by country for 2020. Absolute numbers (N and DALYs) are presented in thousands.

| Country      | Pop. at risk   | Mf-positive   |            | Palpable nodules |            |           | Reversible skin disease |            |            | Irreversible skin disease |            |           | Eye disease (OED) |            |            | Total all manifestations |            |              |
|--------------|----------------|---------------|------------|------------------|------------|-----------|-------------------------|------------|------------|---------------------------|------------|-----------|-------------------|------------|------------|--------------------------|------------|--------------|
|              |                | N             | %          | N                | %          | DALYs     | N                       | %          | DALYs      | N                         | %          | DALYs     | N                 | %          | DALYs      | N                        | %          | DALYs        |
| Angola       | 2,992          | 309           | 10.3       | 50               | 1.7        | 1         | 51                      | 1.7        | 7          | 32                        | 1.1        | 1         | <0.5              | <0.05      | 1          | 134                      | 4.5        | 9            |
| Burundi      | 3,007          | 220           | 7.3        | 33               | 1.1        | <0.5      | 44                      | 1.5        | 6          | 30                        | 1.0        | 1         | <0.5              | <0.05      | 1          | 108                      | 3.6        | 8            |
| Cameroon     | 11,555         | 829           | 7.2        | 208              | 1.8        | 2         | 135                     | 1.2        | 18         | 222                       | 1.9        | 10        | 37                | 0.3        | 67         | 601                      | 5.2        | 98           |
| CAR          | 2,970          | 126           | 4.3        | 31               | 1.0        | <0.5      | 21                      | 0.7        | 3          | 34                        | 1.1        | 1         | 33                | 1.1        | 48         | 119                      | 4.0        | 52           |
| Chad         | 2,882          | 109           | 3.8        | 21               | 0.7        | <0.5      | 22                      | 0.8        | 3          | 20                        | 0.7        | 1         | 21                | 0.7        | 27         | 84                       | 2.9        | 31           |
| Congo        | 1,791          | 186           | 10.4       | 40               | 2.2        | <0.5      | 43                      | 2.4        | 5          | 21                        | 1.2        | 1         | <0.5              | <0.05      | 1          | 104                      | 5.8        | 8            |
| DRC          | 51,916         | 7,182         | 13.8       | 2,464            | 4.7        | 26        | 1,244                   | 2.4        | 174        | 1,121                     | 2.2        | 52        | 64                | 0.1        | 215        | 4,893                    | 9.4        | 467          |
| Eq. Guinea   | 448            | <0.5          | <0.05      | <0.5             | <0.05      | <0.5      | <0.5                    | <0.05      | <0.5       | 5                         | 1.1        | <0.5      | <0.5              | 0.1        | 1          | 5                        | 1.2        | 1            |
| Ethiopia     | 15,180         | 1,614         | 10.6       | 381              | 2.5        | 4         | 338                     | 2.2        | 45         | 207                       | 1.4        | 8         | 4                 | <0.05      | 9          | 930                      | 6.1        | 66           |
| Gabon        | 112            | 22            | 20.0       | 3                | 2.3        | <0.5      | 4                       | 3.8        | 1          | 1                         | 1.2        | <0.5      | <0.5              | <0.05      | <0.5       | 8                        | 7.3        | 1            |
| Liberia      | 1,987          | 5             | 0.3        | 2                | 0.1        | <0.5      | 1                       | <0.05      | <0.5       | 13                        | 0.7        | <0.5      | <0.5              | <0.05      | <0.5       | 15                       | 0.8        | 1            |
| Malawi       | 2,645          | 1             | <0.05      | <0.5             | <0.05      | <0.5      | <0.5                    | <0.05      | <0.5       | 12                        | 0.5        | <0.5      | <0.5              | <0.05      | <0.5       | 13                       | 0.5        | 1            |
| Mozambique   | 82             | 14            | 17.2       | 1                | 1.7        | <0.5      | 3                       | 3.1        | <0.5       | 1                         | 1.0        | <0.5      | <0.5              | <0.05      | <0.5       | 5                        | 5.9        | <0.5         |
| Nigeria      | 63,911         | 2,084         | 3.3        | 278              | 0.4        | 3         | 390                     | 0.6        | 51         | 408                       | 0.6        | 15        | 261               | 0.4        | 316        | 1,338                    | 2.1        | 385          |
| South Sudan  | 8,686          | 979           | 11.3       | 212              | 2.4        | 2         | 128                     | 1.5        | 18         | 98                        | 1.1        | 4         | 117               | 1.3        | 211        | 555                      | 6.4        | 235          |
| Sudan        | 826            | 64            | 7.8        | 8                | 1.0        | <0.5      | 13                      | 1.6        | 2          | 7                         | 0.8        | <0.5      | 8                 | 1.0        | 11         | 36                       | 4.4        | 13           |
| Tanzania     | 4,151          | 338           | 8.1        | 68               | 1.6        | 1         | 69                      | 1.7        | 9          | 55                        | 1.3        | 2         | 2                 | <0.05      | 4          | 194                      | 4.7        | 16           |
| Uganda       | 4,863          | 7             | 0.2        | 10               | 0.2        | <0.5      | 3                       | 0.1        | <0.5       | 42                        | 0.9        | 2         | 2                 | <0.05      | 4          | 56                       | 1.1        | 6            |
| <b>Total</b> | <b>180,004</b> | <b>14,092</b> | <b>7.8</b> | <b>3,810</b>     | <b>2.1</b> | <b>40</b> | <b>2,508</b>            | <b>1.4</b> | <b>341</b> | <b>2,328</b>              | <b>1.3</b> | <b>99</b> | <b>552</b>        | <b>0.3</b> | <b>916</b> | <b>9,198</b>             | <b>5.1</b> | <b>1,397</b> |

Table U: Population at risk, number of cases with infection and clinical manifestations, and DALYs lost due to onchocerciasis by country and APOC-project for 1990. Absolute numbers (N and DALYs) are presented in thousands.

| Country  | Project      | Pop. at risk | Mf-positive |      | Palpable nodules |      |       | Reversible skin disease |      |       | Irreversible skin disease |     |       | Eye disease (OED) |       |       | Total all manifestations |      |       |
|----------|--------------|--------------|-------------|------|------------------|------|-------|-------------------------|------|-------|---------------------------|-----|-------|-------------------|-------|-------|--------------------------|------|-------|
|          |              |              | N           | %    | N                | %    | DALYs | N                       | %    | DALYs | N                         | %   | DALYs | N                 | %     | DALYs | N                        | %    | DALYs |
| Angola   | Bengo        | 13           | 3           | 23.9 | <0.5             | 3.5  | <0.5  | 1                       | 4.9  | <0.5  | <0.5                      | 1.4 | <0.5  | <0.5              | <0.05 | <0.5  | 1                        | 9.8  | <0.5  |
| Angola   | Benguela     | 25           | 6           | 23.6 | 1                | 3.6  | <0.5  | 1                       | 4.8  | <0.5  | <0.5                      | 1.4 | <0.5  | <0.5              | <0.05 | <0.5  | 2                        | 9.8  | <0.5  |
| Angola   | Cuanza Norte | 13           | 3           | 22.6 | <0.5             | 3.1  | <0.5  | 1                       | 4.5  | <0.5  | <0.5                      | 1.3 | <0.5  | <0.5              | <0.05 | <0.5  | 1                        | 8.9  | <0.5  |
| Angola   | Huila        | 119          | 39          | 33.2 | 11               | 8.8  | <0.5  | 10                      | 8.4  | 1     | 3                         | 2.4 | <0.5  | <0.5              | 0.1   | <0.5  | 23                       | 19.7 | 2     |
| Angola   | Kuando       | 205          | 47          | 22.7 | 6                | 3.0  | <0.5  | 9                       | 4.6  | 1     | 3                         | 1.3 | <0.5  | <0.5              | <0.05 | <0.5  | 18                       | 9.0  | 1     |
| Angola   | Kubango      |              |             |      |                  |      |       |                         |      |       |                           |     |       |                   |       |       |                          |      |       |
| Angola   | Lunda Norte  | 153          | 42          | 27.4 | 8                | 5.2  | <0.5  | 9                       | 5.9  | 1     | 3                         | 1.7 | <0.5  | <0.5              | <0.05 | <0.5  | 20                       | 12.8 | 1     |
| Angola   | Lunda sul    | 129          | 37          | 28.5 | 7                | 5.5  | <0.5  | 8                       | 6.5  | 1     | 2                         | 1.8 | <0.5  | <0.5              | <0.05 | <0.5  | 18                       | 13.8 | 1     |
| Angola   | Moxico 1     | 135          | 31          | 23.0 | 4                | 3.1  | <0.5  | 6                       | 4.7  | 1     | 2                         | 1.4 | <0.5  | <0.5              | <0.05 | <0.5  | 13                       | 9.3  | 1     |
| Angola   | Namibe       | 18           | 5           | 26.1 | 1                | 4.3  | <0.5  | 1                       | 5.7  | <0.5  | <0.5                      | 1.7 | <0.5  | <0.5              | <0.05 | <0.5  | 2                        | 11.7 | <0.5  |
| Angola   | NY Benguela  | 57           | 15          | 27.2 | 3                | 5.1  | <0.5  | 3                       | 6.1  | <0.5  | 1                         | 1.8 | <0.5  | <0.5              | <0.05 | <0.5  | 7                        | 13.0 | 1     |
| Angola   | NY Cuanza    | 9            | 2           | 22.6 | <0.5             | 2.4  | <0.5  | <0.5                    | 4.8  | <0.5  | <0.5                      | 1.5 | <0.5  | <0.5              | <0.05 | <0.5  | 1                        | 8.7  | <0.5  |
| Angola   | Norte        |              |             |      |                  |      |       |                         |      |       |                           |     |       |                   |       |       |                          |      |       |
| Angola   | NY Huila     | 11           | 3           | 26.5 | 1                | 4.5  | <0.5  | 1                       | 6.0  | <0.5  | <0.5                      | 1.8 | <0.5  | <0.5              | <0.05 | <0.5  | 1                        | 12.4 | <0.5  |
| Angola   | NY Lunda     | 33           | 9           | 25.8 | 1                | 4.1  | <0.5  | 2                       | 5.6  | <0.5  | 1                         | 1.7 | <0.5  | <0.5              | <0.05 | <0.5  | 4                        | 11.3 | <0.5  |
| Angola   | Norte        |              |             |      |                  |      |       |                         |      |       |                           |     |       |                   |       |       |                          |      |       |
| Angola   | NY Moxico 1  | 172          | 34          | 19.9 | 4                | 2.1  | <0.5  | 6                       | 3.8  | 1     | 2                         | 1.2 | <0.5  | <0.5              | <0.05 | <0.5  | 12                       | 7.0  | 1     |
| Angola   | P5Angola*#   | 131          | 29          | 22.4 | 3                | 2.6  | <0.5  | 6                       | 4.6  | 1     | 2                         | 1.4 | <0.5  | <0.5              | <0.05 | <0.5  | 11                       | 8.6  | 1     |
| Angola   | Uige         | 95           | 26          | 27.3 | 5                | 5.2  | <0.5  | 6                       | 5.9  | 1     | 2                         | 1.7 | <0.5  | <0.5              | <0.05 | <0.5  | 12                       | 12.7 | 1     |
| Angola   | Zaire        | 7            | 1           | 20.3 | <0.5             | 2.1  | <0.5  | <0.5                    | 4.0  | <0.5  | <0.5                      | 1.3 | <0.5  | <0.5              | <0.05 | <0.5  | 1                        | 7.4  | <0.5  |
| Burundi  | Bururi       | 220          | 53          | 23.9 | 8                | 3.5  | <0.5  | 11                      | 4.8  | 1     | 3                         | 1.4 | <0.5  | <0.5              | <0.05 | <0.5  | 22                       | 9.8  | 2     |
| Burundi  | Cibitoke-    | 526          | 173         | 32.9 | 43               | 8.1  | <0.5  | 40                      | 7.7  | 5     | 11                        | 2.1 | <0.5  | <0.5              | <0.05 | <0.5  | 94                       | 17.9 | 6     |
| Burundi  | Bubanza      |              |             |      |                  |      |       |                         |      |       |                           |     |       |                   |       |       |                          |      |       |
| Burundi  | P5Burundi*#  | 415          | 98          | 23.6 | 14               | 3.3  | <0.5  | 20                      | 4.9  | 3     | 6                         | 1.5 | <0.5  | <0.5              | <0.05 | <0.5  | 40                       | 9.7  | 3     |
| Burundi  | Rutana       | 171          | 35          | 20.4 | 4                | 2.1  | <0.5  | 7                       | 3.9  | 1     | 2                         | 1.3 | <0.5  | <0.5              | <0.05 | <0.5  | 13                       | 7.3  | 1     |
| Cameroon | Adamaoua 1   | 287          | 88          | 30.6 | 22               | 7.8  | <0.5  | 22                      | 7.5  | 3     | 6                         | 2.1 | <0.5  | 8                 | 2.7   | 17    | 58                       | 20.1 | 20    |
| Cameroon | Adamaoua 2   | 261          | 86          | 32.9 | 23               | 8.8  | <0.5  | 21                      | 8.0  | 3     | 6                         | 2.1 | <0.5  | 7                 | 2.8   | 15    | 57                       | 21.8 | 18    |
| Cameroon | Centre 1     | 265          | 136         | 51.2 | 61               | 23.0 | 1     | 49                      | 18.4 | 6     | 13                        | 5.1 | 1     | 1                 | 0.4   | 4     | 124                      | 46.8 | 11    |
| Cameroon | Centre 2     | 62           | 27          | 43.6 | 11               | 17.2 | <0.5  | 9                       | 14.4 | 1     | 3                         | 4.1 | <0.5  | <0.5              | 0.3   | 1     | 22                       | 36.0 | 2     |
| Cameroon | Centre 3     | 201          | 80          | 39.9 | 27               | 13.4 | <0.5  | 23                      | 11.4 | 3     | 6                         | 3.1 | <0.5  | <0.5              | 0.1   | 1     | 56                       | 28.0 | 4     |
| Cameroon | East         | 74           | 29          | 39.7 | 11               | 14.7 | <0.5  | 10                      | 13.0 | 1     | 3                         | 3.6 | <0.5  | <0.5              | 0.3   | 1     | 23                       | 31.6 | 2     |
| Cameroon | Far North    | 174          | 33          | 18.8 | 3                | 1.8  | <0.5  | 6                       | 3.5  | 1     | 2                         | 1.0 | <0.5  | 2                 | 1.2   | 3     | 13                       | 7.6  | 4     |



(continued)

| Country  | Project              | Pop. at risk | Mf-positive |      | Palpable nodules |      |       | Reversible skin disease |      |       | Irreversible skin disease |     |       | Eye disease (OED) |       |       | Total all manifestations |      |       |
|----------|----------------------|--------------|-------------|------|------------------|------|-------|-------------------------|------|-------|---------------------------|-----|-------|-------------------|-------|-------|--------------------------|------|-------|
|          |                      |              | N           | %    | N                | %    | DALYs | N                       | %    | DALYs | N                         | %   | DALYs | N                 | %     | DALYs | N                        | %    | DALYs |
| Cameroon | Littoral 1           | 174          | 92          | 52.6 | 42               | 24.0 | <0.5  | 33                      | 19.2 | 4     | 9                         | 5.3 | <0.5  | 1                 | 0.4   | 3     | 85                       | 48.9 | 8     |
| Cameroon | Littoral 2           | 93           | 56          | 60.4 | 31               | 33.3 | <0.5  | 25                      | 27.3 | 3     | 7                         | 7.9 | <0.5  | 1                 | 1.0   | 4     | 65                       | 69.5 | 8     |
| Cameroon | Northern             | 390          | 162         | 41.4 | 61               | 15.5 | 1     | 50                      | 12.8 | 6     | 13                        | 3.4 | 1     | 19                | 4.8   | 54    | 142                      | 36.5 | 61    |
| Cameroon | Northwest            | 507          | 223         | 44.1 | 78               | 15.5 | 1     | 62                      | 12.2 | 8     | 17                        | 3.3 | 1     | 1                 | 0.1   | 2     | 157                      | 31.1 | 12    |
| Cameroon | P20Cameroon*         | 93           | 40          | 43.3 | 14               | 15.2 | <0.5  | 11                      | 12.0 | 1     | 3                         | 3.2 | <0.5  | <0.5              | 0.1   | <0.5  | 29                       | 30.6 | 2     |
| Cameroon | P5Cameroon*#         | 929          | 224         | 24.1 | 34               | 3.6  | <0.5  | 48                      | 5.2  | 6     | 14                        | 1.5 | 1     | <0.5              | <0.05 | 1     | 97                       | 10.4 | 8     |
| Cameroon | South                | 185          | 60          | 32.4 | 15               | 8.1  | <0.5  | 14                      | 7.4  | 2     | 4                         | 2.0 | <0.5  | <0.5              | <0.05 | <0.5  | 33                       | 17.6 | 2     |
| Cameroon | South West 1         | 243          | 143         | 59.0 | 72               | 29.6 | 1     | 56                      | 23.2 | 7     | 16                        | 6.5 | 1     | 1                 | 0.5   | 5     | 145                      | 59.8 | 13    |
| Cameroon | South West 2         | 165          | 88          | 53.2 | 39               | 23.4 | <0.5  | 30                      | 18.2 | 4     | 8                         | 5.0 | <0.5  | 1                 | 0.3   | 2     | 78                       | 46.9 | 6     |
| Cameroon | Western              | 1,016        | 673         | 66.3 | 391              | 38.5 | 4     | 318                     | 31.3 | 38    | 90                        | 8.9 | 5     | 11                | 1.1   | 48    | 811                      | 79.9 | 95    |
| CAR      | CAR region 3         | 265          | 147         | 55.6 | 66               | 24.8 | 1     | 50                      | 18.9 | 6     | 13                        | 4.9 | 1     | 19                | 7.0   | 53    | 147                      | 55.6 | 61    |
| CAR      | CAR region 4         | 276          | 102         | 36.8 | 31               | 11.4 | <0.5  | 27                      | 9.8  | 3     | 7                         | 2.6 | <0.5  | 10                | 3.5   | 22    | 75                       | 27.3 | 26    |
| CAR      | CAR region 5         | 255          | 80          | 31.4 | 19               | 7.6  | <0.5  | 19                      | 7.3  | 2     | 5                         | 2.1 | <0.5  | 6                 | 2.5   | 12    | 50                       | 19.4 | 15    |
| CAR      | CAR region 6         | 393          | 181         | 46.0 | 69               | 17.7 | 1     | 55                      | 13.9 | 7     | 14                        | 3.7 | 1     | 20                | 5.1   | 52    | 158                      | 40.3 | 61    |
| CAR      | P20CAR*              | 39           | 16          | 41.3 | 5                | 13.5 | <0.5  | 4                       | 10.9 | 1     | 1                         | 2.9 | <0.5  | <0.5              | 0.1   | <0.5  | 11                       | 27.4 | 1     |
| CAR      | P5CAR*#              | 88           | 23          | 26.3 | 4                | 4.8  | <0.5  | 5                       | 5.9  | 1     | 2                         | 1.7 | <0.5  | <0.5              | <0.05 | <0.5  | 11                       | 12.5 | 1     |
| Chad     | Chad                 | 1,068        | 326         | 30.5 | 75               | 7.1  | 1     | 72                      | 6.7  | 9     | 20                        | 1.8 | 1     | 25                | 2.3   | 47    | 192                      | 17.9 | 57    |
| Chad     | P5Chad*#             | 133          | 36          | 27.3 | 8                | 5.8  | <0.5  | 7                       | 5.6  | 1     | 2                         | 1.5 | <0.5  | 3                 | 1.9   | 4     | 20                       | 14.8 | 6     |
| Chad     | P5Chad<br>propext*#  | 76           | 17          | 22.3 | 2                | 3.1  | <0.5  | 3                       | 4.3  | <0.5  | 1                         | 1.2 | <0.5  | 1                 | 1.5   | 2     | 8                        | 10.0 | 2     |
| Congo    | Congo 1              | 487          | 133         | 27.3 | 27               | 5.5  | <0.5  | 29                      | 6.0  | 4     | 8                         | 1.7 | <0.5  | <0.5              | <0.05 | 1     | 65                       | 13.3 | 5     |
| Congo    | P20Congo*            | 21           | 12          | 56.7 | 5                | 24.7 | <0.5  | 4                       | 18.7 | <0.5  | 1                         | 5.0 | <0.5  | <0.5              | 0.3   | <0.5  | 10                       | 48.6 | 1     |
| Congo    | P5Congo*#            | 286          | 75          | 26.4 | 14               | 4.8  | <0.5  | 18                      | 6.3  | 2     | 5                         | 1.8 | <0.5  | <0.5              | 0.1   | <0.5  | 37                       | 13.0 | 3     |
| DRC      | Bandundu             | 3            | 1           | 27.1 | <0.5             | 4.9  | <0.5  | <0.5                    | 6.3  | <0.5  | <0.5                      | 1.9 | <0.5  | <0.5              | <0.05 | <0.5  | <0.5                     | 13.1 | <0.5  |
| DRC      | Bas-Congo            | 803          | 298         | 37.0 | 89               | 11.1 | 1     | 77                      | 9.6  | 10    | 21                        | 2.6 | 1     | 1                 | 0.1   | 2     | 188                      | 23.3 | 13    |
| DRC      | Kinshasa<br>Butembo- | 499          | 215         | 43.1 | 76               | 15.1 | 1     | 60                      | 12.0 | 7     | 16                        | 3.2 | 1     | 1                 | 0.1   | 2     | 152                      | 30.4 | 11    |
| DRC      | Beni                 | 664          | 272         | 40.9 | 89               | 13.4 | 1     | 72                      | 10.9 | 9     | 19                        | 2.9 | 1     | 1                 | 0.1   | 2     | 181                      | 27.3 | 13    |
| DRC      | Equateur-Kiri        | 671          | 423         | 63.0 | 246              | 36.7 | 3     | 205                     | 30.5 | 24    | 59                        | 8.8 | 4     | 9                 | 1.3   | 38    | 519                      | 77.3 | 68    |
| DRC      | Ituri-Nord           | 614          | 354         | 57.7 | 192              | 31.2 | 2     | 159                     | 25.9 | 19    | 46                        | 7.4 | 3     | 6                 | 0.9   | 24    | 402                      | 65.5 | 48    |
| DRC      | Ituri-Sud            | 614          | 354         | 57.7 | 192              | 31.2 | 2     | 159                     | 25.9 | 19    | 46                        | 7.4 | 3     | 6                 | 0.9   | 24    | 402                      | 65.5 | 48    |
| DRC      | Kasai                | 5,756        | 2,210       | 38.4 | 801              | 13.9 | 9     | 722                     | 12.5 | 88    | 207                       | 3.6 | 10    | 17                | 0.3   | 72    | 1,748                    | 30.4 | 179   |
| DRC      | Kasongo              | 721          | 228         | 31.6 | 59               | 8.2  | 1     | 59                      | 8.1  | 7     | 17                        | 2.3 | 1     | 1                 | 0.1   | 2     | 135                      | 18.7 | 11    |

(continued)

| Country            | Project                    | Pop. at risk | Mf-positive |      | Palpable nodules |      |       | Reversible skin disease |      |       | Irreversible skin disease |      |       | Eye disease (OED) |       |       | Total all manifestations |       |       |
|--------------------|----------------------------|--------------|-------------|------|------------------|------|-------|-------------------------|------|-------|---------------------------|------|-------|-------------------|-------|-------|--------------------------|-------|-------|
|                    |                            |              | N           | %    | N                | %    | DALYs | N                       | %    | DALYs | N                         | %    | DALYs | N                 | %     | DALYs | N                        | %     | DALYs |
| DRC                | Katanga-Nord               | 335          | 126         | 37.6 | 45               | 13.4 | <0.5  | 41                      | 12.1 | 5     | 11                        | 3.4  | 1     | 1                 | 0.3   | 3     | 98                       | 29.1  | 9     |
| DRC                | Katanga-Sud                | 371          | 141         | 38.0 | 50               | 13.6 | 1     | 45                      | 12.2 | 6     | 13                        | 3.5  | 1     | 1                 | 0.3   | 4     | 110                      | 29.6  | 11    |
| DRC                | Lualaba                    | 120          | 48          | 39.7 | 16               | 13.2 | <0.5  | 13                      | 11.1 | 2     | 4                         | 3.0  | <0.5  | <0.5              | 0.1   | 1     | 33                       | 27.5  | 2     |
| DRC                | Lubutu                     | 179          | 101         | 56.7 | 45               | 25.2 | <0.5  | 34                      | 19.2 | 4     | 9                         | 5.2  | <0.5  | 1                 | 0.3   | 2     | 89                       | 49.9  | 7     |
| DRC                | Masisi-<br>Walikale        | 560          | 290         | 51.7 | 128              | 22.8 | 1     | 101                     | 18.1 | 12    | 28                        | 5.0  | 1     | 2                 | 0.4   | 10    | 260                      | 46.3  | 25    |
| DRC                | Mongala                    | 779          | 286         | 36.7 | 86               | 11.1 | 1     | 74                      | 9.4  | 9     | 21                        | 2.6  | 1     | 1                 | 0.1   | 3     | 181                      | 23.3  | 14    |
| DRC                | NY                         | 243          | 60          | 24.5 | 9                | 3.8  | <0.5  | 13                      | 5.4  | 2     | 4                         | 1.6  | <0.5  | <0.5              | <0.05 | <0.5  | 26                       | 10.9  | 2     |
| DRC                | Katanga-Nord<br>NY Lualaba | 526          | 146         | 27.7 | 27               | 5.1  | <0.5  | 33                      | 6.3  | 4     | 10                        | 1.8  | <0.5  | <0.5              | <0.05 | <0.5  | 70                       | 13.3  | 5     |
| DRC                | NY Masisi-<br>Walikale     | 29           | 11          | 37.2 | 3                | 10.4 | <0.5  | 3                       | 9.0  | <0.5  | 1                         | 2.4  | <0.5  | <0.5              | <0.05 | <0.5  | 6                        | 21.9  | <0.5  |
| DRC                | NY Rutshuru-<br>Ngoma      | 5            | 2           | 50.8 | 1                | 18.8 | <0.5  | 1                       | 13.8 | <0.5  | <0.5                      | 3.7  | <0.5  | <0.5              | 0.1   | <0.5  | 2                        | 36.5  | <0.5  |
| DRC                | NY Sankuru                 | 251          | 70          | 27.9 | 15               | 5.9  | <0.5  | 18                      | 7.1  | 2     | 5                         | 2.0  | <0.5  | <0.5              | 0.1   | 1     | 38                       | 15.1  | 3     |
| DRC                | NY Ueles                   | 85           | 50          | 59.0 | 28               | 32.7 | <0.5  | 23                      | 27.0 | 3     | 7                         | 7.8  | <0.5  | 1                 | 1.0   | 4     | 58                       | 68.5  | 7     |
| DRC                | P20DRC*                    | 1,259        | 592         | 47.0 | 238              | 18.9 | 3     | 190                     | 15.1 | 23    | 52                        | 4.1  | 2     | 4                 | 0.3   | 14    | 484                      | 38.4  | 42    |
| DRC                | P5DRC*#                    | 4,003        | 975         | 24.4 | 148              | 3.7  | 2     | 209                     | 5.2  | 27    | 62                        | 1.5  | 2     | 1                 | <0.05 | 2     | 419                      | 10.5  | 32    |
| DRC                | Rutshuru-<br>Ngoma         | 353          | 138         | 39.2 | 40               | 11.2 | <0.5  | 32                      | 9.2  | 4     | 9                         | 2.5  | <0.5  | <0.5              | <0.05 | <0.5  | 81                       | 22.9  | 5     |
| DRC                | Sankuru                    | 571          | 270         | 47.2 | 133              | 23.2 | 1     | 116                     | 20.3 | 14    | 34                        | 6.0  | 2     | 5                 | 0.8   | 20    | 287                      | 50.3  | 37    |
| DRC                | Tshopo                     | 853          | 438         | 51.4 | 200              | 23.4 | 2     | 161                     | 18.9 | 19    | 45                        | 5.3  | 2     | 4                 | 0.5   | 17    | 410                      | 48.1  | 41    |
| DRC                | Tshuapa                    | 760          | 381         | 50.2 | 165              | 21.7 | 2     | 133                     | 17.5 | 16    | 37                        | 4.9  | 2     | 3                 | 0.4   | 11    | 337                      | 44.4  | 30    |
| DRC                | Ubangi-Nord                | 428          | 207         | 48.3 | 94               | 21.9 | 1     | 78                      | 18.1 | 9     | 22                        | 5.1  | 1     | 2                 | 0.5   | 10    | 196                      | 45.7  | 21    |
| DRC                | Ubangi-Sud                 | 722          | 231         | 32.0 | 56               | 7.7  | 1     | 54                      | 7.5  | 7     | 15                        | 2.1  | 1     | <0.5              | <0.05 | 1     | 125                      | 17.3  | 9     |
| DRC                | Ueles                      | 842          | 512         | 60.8 | 288              | 34.3 | 3     | 239                     | 28.3 | 28    | 69                        | 8.2  | 4     | 10                | 1.2   | 44    | 606                      | 72.0  | 79    |
| Eq.                | Bioko                      | 59           | 44          | 74.8 | 32               | 53.4 | <0.5  | 28                      | 47.8 | 3     | 9                         | 15.3 | 1     | 2                 | 3.6   | 11    | 71                       | 120.1 | 15    |
| Guinea<br>Eq.      | P5EqGuinea*#               | 139          | 31          | 22.6 | 3                | 2.4  | <0.5  | 7                       | 4.8  | 1     | 2                         | 1.5  | <0.5  | <0.5              | <0.05 | <0.5  | 12                       | 8.7   | 1     |
| Guinea<br>Ethiopia | Assosa                     | 317          | 84          | 26.5 | 15               | 4.7  | <0.5  | 18                      | 5.7  | 2     | 5                         | 1.6  | <0.5  | <0.5              | <0.05 | <0.5  | 38                       | 12.1  | 3     |
| Ethiopia           | Bench-Maji                 | 420          | 162         | 38.7 | 49               | 11.6 | 1     | 40                      | 9.5  | 5     | 11                        | 2.6  | <0.5  | <0.5              | 0.1   | 1     | 100                      | 23.7  | 7     |
| Ethiopia           | East Wellega               | 514          | 175         | 34.1 | 46               | 9.0  | <0.5  | 42                      | 8.2  | 5     | 12                        | 2.3  | <0.5  | <0.5              | 0.1   | 1     | 101                      | 19.6  | 7     |
| Ethiopia           | Gambella                   | 61           | 22          | 36.4 | 6                | 10.3 | <0.5  | 6                       | 9.1  | 1     | 2                         | 2.5  | <0.5  | <0.5              | 0.1   | <0.5  | 13                       | 22.0  | 1     |

(continued)

| Country  | Project        | Pop. at risk | Mf-positive |      | Palpable nodules |      |       | Reversible skin disease |      |       | Irreversible skin disease |     |       | Eye disease (OED) |       |       | Total all manifestations |      |       |
|----------|----------------|--------------|-------------|------|------------------|------|-------|-------------------------|------|-------|---------------------------|-----|-------|-------------------|-------|-------|--------------------------|------|-------|
|          |                |              | N           | %    | N                | %    | DALYs | N                       | %    | DALYs | N                         | %   | DALYs | N                 | %     | DALYs | N                        | %    | DALYs |
| Ethiopia | Horo Guduru    | 30           | 10          | 34.7 | 3                | 9.0  | <0.5  | 2                       | 7.8  | <0.5  | 1                         | 2.1 | <0.5  | <0.5              | <0.05 | <0.5  | 6                        | 19.0 | <0.5  |
| Ethiopia | Illubabor      | 435          | 169         | 38.9 | 54               | 12.3 | 1     | 44                      | 10.0 | 5     | 12                        | 2.7 | <0.5  | <0.5              | 0.1   | 1     | 109                      | 25.2 | 8     |
| Ethiopia | Jimma          | 513          | 145         | 28.2 | 29               | 5.6  | <0.5  | 31                      | 6.1  | 4     | 9                         | 1.8 | <0.5  | <0.5              | <0.05 | <0.5  | 69                       | 13.5 | 5     |
| Ethiopia | Kaffa-Sheka    | 729          | 326         | 44.8 | 113              | 15.5 | 1     | 91                      | 12.4 | 11    | 24                        | 3.4 | 1     | 1                 | 0.1   | 2     | 229                      | 31.5 | 16    |
| Ethiopia | Kamashi        | 271          | 102         | 37.7 | 33               | 12.3 | <0.5  | 28                      | 10.2 | 3     | 8                         | 2.8 | <0.5  | <0.5              | 0.1   | 1     | 69                       | 25.5 | 5     |
| Ethiopia | Metekel        | 93           | 28          | 30.1 | 6                | 6.6  | <0.5  | 6                       | 6.7  | 1     | 2                         | 1.9 | <0.5  | <0.5              | <0.05 | <0.5  | 14                       | 15.2 | 1     |
| Ethiopia | North Gondar   | 180          | 51          | 28.5 | 11               | 5.9  | <0.5  | 12                      | 6.6  | 1     | 3                         | 1.9 | <0.5  | <0.5              | <0.05 | <0.5  | 26                       | 14.4 | 2     |
| Ethiopia | NY East        | 165          | 63          | 38.5 | 20               | 12.2 | <0.5  | 16                      | 9.8  | 2     | 4                         | 2.7 | <0.5  | <0.5              | 0.1   | <0.5  | 41                       | 24.8 | 3     |
| Ethiopia | Wellega        |              |             |      |                  |      |       |                         |      |       |                           |     |       |                   |       |       |                          |      |       |
| Ethiopia | NY West        | 167          | 41          | 24.8 | 7                | 4.2  | <0.5  | 8                       | 5.0  | 1     | 2                         | 1.5 | <0.5  | <0.5              | <0.05 | <0.5  | 18                       | 10.7 | 1     |
| Ethiopia | Wellega        |              |             |      |                  |      |       |                         |      |       |                           |     |       |                   |       |       |                          |      |       |
| Ethiopia | P20Ethiopia*   | 191          | 81          | 42.1 | 27               | 14.2 | <0.5  | 21                      | 11.2 | 3     | 6                         | 3.0 | <0.5  | <0.5              | 0.1   | 1     | 55                       | 28.5 | 4     |
| Ethiopia | P5Ethiopia*    | 2,018        | 494         | 24.5 | 75               | 3.7  | 1     | 103                     | 5.1  | 13    | 30                        | 1.5 | 1     | <0.5              | <0.05 | 1     | 209                      | 10.4 | 16    |
| Ethiopia | West Shewa     | 33           | 7           | 22.1 | 1                | 2.7  | <0.5  | 1                       | 4.5  | <0.5  | <0.5                      | 1.3 | <0.5  | <0.5              | <0.05 | <0.5  | 3                        | 8.5  | <0.5  |
| Ethiopia | West Wellega   | 590          | 244         | 41.3 | 86               | 14.6 | 1     | 72                      | 12.2 | 9     | 20                        | 3.4 | 1     | 1                 | 0.2   | 3     | 179                      | 30.3 | 14    |
| Gabon    | P5Gabon*#      | 49           | 11          | 21.6 | 1                | 2.5  | <0.5  | 2                       | 4.3  | <0.5  | 1                         | 1.3 | <0.5  | <0.5              | <0.05 | <0.5  | 4                        | 8.1  | <0.5  |
| Liberia  | All_Liberia    | 881          | 343         | 39.0 | 100              | 11.3 | 1     | 72                      | 8.2  | 9     | 19                        | 2.1 | 1     | <0.5              | <0.05 | <0.5  | 191                      | 21.7 | 11    |
| Malawi   | Malawi         | 665          | 136         | 20.4 | 15               | 2.2  | <0.5  | 26                      | 3.9  | 3     | 8                         | 1.2 | <0.5  | <0.5              | <0.05 | <0.5  | 49                       | 7.4  | 4     |
| Malawi   | Extension      |              |             |      |                  |      |       |                         |      |       |                           |     |       |                   |       |       |                          |      |       |
| Malawi   | Thyolo         | 507          | 137         | 27.0 | 26               | 5.2  | <0.5  | 28                      | 5.5  | 4     | 8                         | 1.6 | <0.5  | <0.5              | <0.05 | <0.5  | 62                       | 12.3 | 4     |
| Malawi   | Mwanza         |              |             |      |                  |      |       |                         |      |       |                           |     |       |                   |       |       |                          |      |       |
| Mozamb.  | P20Mozambique* | 9            | 2           | 20.4 | <0.5             | 2.2  | <0.5  | <0.5                    | 4.0  | <0.5  | <0.5                      | 1.2 | <0.5  | <0.5              | <0.05 | <0.5  | 1                        | 7.4  | <0.5  |
| Mozamb.  | P5Mozambique*  | 27           | 5           | 19.9 | 1                | 2.0  | <0.5  | 1                       | 3.9  | <0.5  | <0.5                      | 1.2 | <0.5  | <0.5              | <0.05 | <0.5  | 2                        | 7.1  | <0.5  |
| Nigeria  | Adamawa        | 1,019        | 241         | 23.7 | 34               | 3.4  | <0.5  | 49                      | 4.9  | 6     | 14                        | 1.4 | 1     | 17                | 1.7   | 27    | 115                      | 11.3 | 35    |
| Nigeria  | Akwa Ibom      | 17           | 4           | 21.6 | <0.5             | 2.5  | <0.5  | 1                       | 4.3  | <0.5  | <0.5                      | 1.3 | <0.5  | <0.5              | <0.05 | <0.5  | 1                        | 8.1  | <0.5  |
| Nigeria  | Bauchi         | 1,044        | 225         | 21.5 | 26               | 2.5  | <0.5  | 45                      | 4.3  | 6     | 14                        | 1.3 | <0.5  | 16                | 1.5   | 26    | 101                      | 9.6  | 33    |
| Nigeria  | Benue          | 2,058        | 783         | 38.0 | 239              | 11.6 | 3     | 203                     | 9.9  | 25    | 56                        | 2.7 | 2     | 2                 | 0.1   | 5     | 500                      | 24.3 | 36    |
| Nigeria  | Borno          | 820          | 160         | 19.5 | 18               | 2.2  | <0.5  | 29                      | 3.5  | 4     | 9                         | 1.1 | <0.5  | 10                | 1.3   | 16    | 66                       | 8.1  | 20    |
| Nigeria  | Cross River    | 744          | 222         | 29.8 | 55               | 7.4  | 1     | 55                      | 7.4  | 7     | 16                        | 2.1 | 1     | 1                 | 0.1   | 2     | 127                      | 17.1 | 10    |
| Nigeria  | Edo Delta      | 956          | 266         | 27.8 | 52               | 5.4  | 1     | 57                      | 5.9  | 7     | 16                        | 1.7 | 1     | <0.5              | <0.05 | <0.5  | 125                      | 13.1 | 9     |
| Nigeria  | Ekiti          | 1,291        | 265         | 20.5 | 28               | 2.2  | <0.5  | 52                      | 4.0  | 7     | 16                        | 1.2 | 1     | <0.5              | <0.05 | <0.5  | 95                       | 7.4  | 8     |
| Nigeria  | Enugu          | 1,421        | 691         | 48.6 | 273              | 19.2 | 3     | 211                     | 14.9 | 26    | 57                        | 4.0 | 3     | 3                 | 0.2   | 10    | 545                      | 38.3 | 42    |
| Nigeria  | Anambra        |              |             |      |                  |      |       |                         |      |       |                           |     |       |                   |       |       |                          |      |       |
| Nigeria  | Ebony          |              |             |      |                  |      |       |                         |      |       |                           |     |       |                   |       |       |                          |      |       |

(continued)

| Country     | Project             | Pop. at risk | Mf-positive |      | Palpable nodules |      |       | Reversible skin disease |      |       | Irreversible skin disease |     |       | Eye disease (OED) |       |       | Total all manifestations |      |       |
|-------------|---------------------|--------------|-------------|------|------------------|------|-------|-------------------------|------|-------|---------------------------|-----|-------|-------------------|-------|-------|--------------------------|------|-------|
|             |                     |              | N           | %    | N                | %    | DALYs | N                       | %    | DALYs | N                         | %   | DALYs | N                 | %     | DALYs | N                        | %    | DALYs |
| Nigeria     | FCT                 | 302          | 67          | 22.3 | 8                | 2.6  | <0.5  | 14                      | 4.7  | 2     | 4                         | 1.4 | <0.5  | <0.5              | <0.05 | <0.5  | 26                       | 8.7  | 2     |
| Nigeria     | Gombe               | 1,134        | 261         | 23.1 | 35               | 3.1  | <0.5  | 54                      | 4.8  | 7     | 16                        | 1.4 | 1     | 20                | 1.7   | 33    | 125                      | 11.0 | 41    |
| Nigeria     | Imo Abia            | 783          | 226         | 28.8 | 49               | 6.3  | 1     | 52                      | 6.7  | 7     | 15                        | 1.9 | 1     | <0.5              | <0.05 | 1     | 117                      | 14.9 | 8     |
| Nigeria     | Jigawa              | 212          | 45          | 21.1 | 5                | 2.2  | <0.5  | 9                       | 4.2  | 1     | 3                         | 1.2 | <0.5  | 3                 | 1.5   | 5     | 19                       | 9.1  | 6     |
| Nigeria     | Kaduna              | 1,650        | 393         | 23.8 | 57               | 3.4  | 1     | 84                      | 5.1  | 11    | 24                        | 1.5 | 1     | 29                | 1.8   | 50    | 194                      | 11.7 | 62    |
| Nigeria     | Kano                | 589          | 121         | 20.5 | 13               | 2.2  | <0.5  | 23                      | 4.0  | 3     | 7                         | 1.2 | <0.5  | 8                 | 1.4   | 13    | 52                       | 8.8  | 17    |
| Nigeria     | Kebbi               | 124          | 24          | 19.3 | 2                | 1.9  | <0.5  | 5                       | 3.7  | 1     | 1                         | 1.1 | <0.5  | 2                 | 1.3   | 3     | 10                       | 8.0  | 3     |
| Nigeria     | Kogi                | 1,063        | 275         | 25.9 | 48               | 4.5  | 1     | 58                      | 5.5  | 7     | 17                        | 1.6 | 1     | <0.5              | <0.05 | <0.5  | 124                      | 11.6 | 9     |
| Nigeria     | Kwara               | 898          | 223         | 24.8 | 37               | 4.1  | <0.5  | 45                      | 5.0  | 6     | 13                        | 1.4 | <0.5  | 16                | 1.7   | 26    | 110                      | 12.2 | 32    |
| Nigeria     | Niger               | 1,579        | 332         | 21.0 | 39               | 2.5  | <0.5  | 65                      | 4.1  | 8     | 19                        | 1.2 | 1     | 23                | 1.4   | 35    | 145                      | 9.2  | 44    |
| Nigeria     | Ogun                | 205          | 57          | 27.9 | 11               | 5.4  | <0.5  | 12                      | 5.9  | 2     | 3                         | 1.7 | <0.5  | <0.5              | <0.05 | <0.5  | 27                       | 13.0 | 2     |
| Nigeria     | Ondo                | 814          | 206         | 25.3 | 35               | 4.3  | <0.5  | 42                      | 5.2  | 5     | 12                        | 1.5 | <0.5  | <0.5              | <0.05 | <0.5  | 90                       | 11.0 | 7     |
| Nigeria     | Osun                | 960          | 211         | 22.0 | 29               | 3.0  | <0.5  | 41                      | 4.3  | 5     | 12                        | 1.3 | <0.5  | <0.5              | <0.05 | <0.5  | 82                       | 8.6  | 6     |
| Nigeria     | Oyo                 | 655          | 149         | 22.8 | 23               | 3.5  | <0.5  | 28                      | 4.3  | 4     | 8                         | 1.3 | <0.5  | 10                | 1.5   | 15    | 69                       | 10.5 | 19    |
| Nigeria     | P20Nigeria *        | 132          | 54          | 41.0 | 17               | 12.9 | <0.5  | 14                      | 10.3 | 2     | 4                         | 2.7 | <0.5  | <0.5              | 0.1   | <0.5  | 34                       | 26.0 | 2     |
| Nigeria     | P5Nigeria *#        | 4,491        | 930         | 20.7 | 105              | 2.3  | 1     | 183                     | 4.1  | 23    | 54                        | 1.2 | 2     | 62                | 1.4   | 95    | 404                      | 9.0  | 122   |
| Nigeria     | Plateau             | 911          | 227         | 24.9 | 35               | 3.8  | <0.5  | 48                      | 5.3  | 6     | 13                        | 1.5 | <0.5  | 17                | 1.9   | 28    | 113                      | 12.4 | 35    |
| Nigeria     | Nassarawa Plateau   | 922          | 279         | 30.3 | 66               | 7.2  | 1     | 62                      | 6.8  | 8     | 17                        | 1.9 | 1     | 22                | 2.3   | 40    | 167                      | 18.1 | 49    |
| Nigeria     | Nassarawa LF Taraba | 991          | 310         | 31.2 | 80               | 8.0  | 1     | 77                      | 7.8  | 10    | 22                        | 2.2 | 1     | 28                | 2.8   | 62    | 206                      | 20.8 | 73    |
| Nigeria     | Yobe                | 366          | 70          | 19.1 | 7                | 1.9  | <0.5  | 13                      | 3.6  | 2     | 4                         | 1.0 | <0.5  | 5                 | 1.2   | 7     | 28                       | 7.7  | 9     |
| Nigeria     | Zamfara             | 170          | 36          | 21.1 | 4                | 2.2  | <0.5  | 7                       | 4.2  | 1     | 2                         | 1.2 | <0.5  | 3                 | 1.5   | 4     | 15                       | 9.1  | 5     |
| South Sudan | East Bahr El Ghazal | 326          | 105         | 32.1 | 27               | 8.3  | <0.5  | 24                      | 7.2  | 3     | 6                         | 2.0 | <0.5  | 8                 | 2.4   | 15    | 65                       | 19.9 | 19    |
| Sudan       | South Equatoria     | 580          | 180         | 31.0 | 44               | 7.6  | <0.5  | 40                      | 6.9  | 5     | 11                        | 1.9 | <0.5  | 14                | 2.4   | 26    | 109                      | 18.8 | 32    |
| South Sudan | P20SouthSudan*      | 16           | 6           | 37.7 | 2                | 10.8 | <0.5  | 1                       | 8.8  | <0.5  | <0.5                      | 2.3 | <0.5  | <0.5              | 3.0   | 1     | 4                        | 25.0 | 1     |
| South Sudan | P5SouthSudan*#      | 450          | 91          | 20.2 | 10               | 2.2  | <0.5  | 17                      | 3.9  | 2     | 5                         | 1.1 | <0.5  | 6                 | 1.4   | 9     | 39                       | 8.7  | 11    |
| South Sudan | Upper Nile          | 304          | 75          | 24.6 | 12               | 3.9  | <0.5  | 16                      | 5.1  | 2     | 5                         | 1.5 | <0.5  | 6                 | 1.8   | 10    | 38                       | 12.4 | 12    |
| South Sudan | West Bahr El Ghazal | 1,758        | 525         | 29.8 | 137              | 7.8  | 1     | 132                     | 7.5  | 16    | 36                        | 2.1 | 2     | 47                | 2.7   | 120   | 353                      | 20.1 | 139   |

(continued)

| Country      | Project                | Pop. at risk  | Mf-positive   |             | Palpable nodules |            |           | Reversible skin disease |            |            | Irreversible skin disease |            |           | Eye disease (OED) |            |              | Total all manifestations |             |              |
|--------------|------------------------|---------------|---------------|-------------|------------------|------------|-----------|-------------------------|------------|------------|---------------------------|------------|-----------|-------------------|------------|--------------|--------------------------|-------------|--------------|
|              |                        |               | N             | %           | N                | %          | DALYs     | N                       | %          | DALYs      | N                         | %          | DALYs     | N                 | %          | DALYs        | N                        | %           | DALYs        |
| South Sudan  | West Equatoria         | 415           | 141           | 33.9        | 38               | 9.2        | <0.5      | 33                      | 7.8        | 4          | 9                         | 2.2        | <0.5      | 11                | 2.7        | 22           | 91                       | 21.9        | 27           |
| Sudan        | P5Sudan*#              | 127           | 29            | 22.6        | 4                | 2.9        | <0.5      | 6                       | 4.7        | 1          | 2                         | 1.4        | <0.5      | 2                 | 1.7        | 3            | 13                       | 10.6        | 4            |
| Sudan        | Sudan                  | 120           | 25            | 21.1        | 3                | 2.2        | <0.5      | 5                       | 4.2        | 1          | 1                         | 1.2        | <0.5      | 2                 | 1.5        | 3            | 11                       | 9.1         | 4            |
| Sudan        | Sudan Abu Hamed Kilosa | 120           | 25            | 21.1        | 3                | 2.2        | <0.5      | 5                       | 4.2        | 1          | 1                         | 1.2        | <0.5      | 2                 | 1.5        | 3            | 11                       | 9.1         | 4            |
| Tanzania     | Mahenge                | 287           | 80            | 27.8        | 14               | 4.8        | <0.5      | 19                      | 6.5        | 2          | 5                         | 1.9        | <0.5      | <0.5              | <0.05      | <0.5         | 38                       | 13.2        | 3            |
| Tanzania     | Morogoro               | 287           | 127           | 44.2        | 48               | 16.8       | 1         | 39                      | 13.7       | 5          | 11                        | 3.8        | 1         | 1                 | 0.3        | 3            | 99                       | 34.6        | 9            |
| Tanzania     | P5Tanzania*            | 205           | 58            | 28.1        | 11               | 5.6        | <0.5      | 13                      | 6.2        | 2          | 4                         | 1.8        | <0.5      | <0.5              | <0.05      | <0.5         | 28                       | 13.5        | 2            |
| Tanzania     | Ruvuma                 | 520           | 135           | 25.9        | 23               | 4.4        | <0.5      | 30                      | 5.7        | 4          | 9                         | 1.7        | <0.5      | <0.5              | <0.05      | <0.5         | 61                       | 11.8        | 5            |
| Tanzania     | Tanga                  | 227           | 127           | 56.2        | 64               | 28.3       | 1         | 52                      | 23.0       | 6          | 15                        | 6.5        | 1         | 2                 | 0.7        | 7            | 133                      | 58.5        | 15           |
| Tanzania     | Tukuyu                 | 178           | 47            | 26.3        | 8                | 4.5        | <0.5      | 10                      | 5.7        | 1          | 3                         | 1.6        | <0.5      | <0.5              | <0.05      | <0.5         | 21                       | 11.8        | 2            |
| Tanzania     | Tunduru                | 65            | 25            | 38.9        | 8                | 13.0       | <0.5      | 7                       | 11.0       | 1          | 2                         | 3.0        | <0.5      | <0.5              | 0.1        | <0.5         | 18                       | 27.2        | 1            |
| Tanzania     | P5Uganda*              | 71            | 33            | 46.7        | 13               | 18.0       | <0.5      | 10                      | 14.3       | 1          | 3                         | 3.9        | <0.5      | <0.5              | 0.2        | 1            | 26                       | 36.4        | 2            |
| Uganda       | Phase 1                | 131           | 31            | 23.4        | 4                | 3.2        | <0.5      | 6                       | 4.9        | 1          | 2                         | 1.5        | <0.5      | <0.5              | <0.05      | <0.5         | 13                       | 9.6         | 1            |
| Uganda       | Phase 2                | 205           | 58            | 28.3        | 12               | 5.6        | <0.5      | 13                      | 6.5        | 2          | 4                         | 1.9        | <0.5      | <0.5              | <0.05      | <0.5         | 29                       | 14.0        | 2            |
| Uganda       | Phase 3                | 399           | 90            | 22.6        | 10               | 2.4        | <0.5      | 19                      | 4.8        | 2          | 6                         | 1.5        | <0.5      | <0.5              | <0.05      | <0.5         | 35                       | 8.7         | 3            |
| Uganda       | Phase 4                | 736           | 336           | 45.7        | 145              | 19.7       | 2         | 123                     | 16.7       | 15         | 35                        | 4.7        | 2         | 3                 | 0.5        | 14           | 306                      | 41.6        | 32           |
| Uganda       | Phase 5                | 416           | 114           | 27.4        | 21               | 5.1        | <0.5      | 26                      | 6.2        | 3          | 7                         | 1.8        | <0.5      | <0.5              | <0.05      | <0.5         | 55                       | 13.1        | 4            |
| Uganda       | Phase 5                | 268           | 79            | 29.6        | 18               | 6.8        | <0.5      | 20                      | 7.3        | 2          | 6                         | 2.1        | <0.5      | <0.5              | 0.1        | <0.5         | 44                       | 16.2        | 3            |
| <b>Total</b> | <b>Total</b>           | <b>79,768</b> | <b>25,964</b> | <b>32.5</b> | <b>7,617</b>     | <b>9.5</b> | <b>81</b> | <b>7,205</b>            | <b>9.0</b> | <b>890</b> | <b>2,041</b>              | <b>2.6</b> | <b>91</b> | <b>616</b>        | <b>0.8</b> | <b>1,410</b> | <b>17,478</b>            | <b>21.9</b> | <b>2,472</b> |

\* P5 and P20 APOC-projects are a compilation of multiple areas within a country with a prevalence of palpable nodule of  $\geq 5\%$ –  $< 20\%$  and  $\geq 20\%$  respectively.

# Onchocerciasis hypoendemic areas with confirmed *L. loa* co-endemicity

Table V: Population at risk, number of cases with infection and clinical manifestations, and DALYs lost due to onchocerciasis by country and APOC-project for 2020. Absolute numbers (N and DALYs) are presented in thousands.

| Country  | Project      | Pop. at risk | Mf-positive |      | Palpable nodules |       |       | Reversible skin disease |       |       | Irreversible skin disease |     |       | Eye disease (OED) |       |       | Total all manifestations |      |       |
|----------|--------------|--------------|-------------|------|------------------|-------|-------|-------------------------|-------|-------|---------------------------|-----|-------|-------------------|-------|-------|--------------------------|------|-------|
|          |              |              | N           | %    | N                | %     | DALYs | N                       | %     | DALYs | N                         | %   | DALYs | N                 | %     | DALYs | N                        | %    | DALYs |
| Angola   | Bengo        | 30           | 1           | 3.4  | <0.5             | 0.6   | <0.5  | <0.5                    | 0.3   | <0.5  | <0.5                      | 0.9 | <0.5  | <0.5              | <0.05 | <0.5  | 1                        | 1.8  | <0.5  |
| Angola   | Benguela     | 57           | 4           | 7.6  | 1                | 1.3   | <0.5  | <0.5                    | 0.7   | <0.5  | 1                         | 0.9 | <0.5  | <0.5              | <0.05 | <0.5  | 2                        | 2.9  | <0.5  |
| Angola   | Cuanza Norte | 29           | 1           | 4.0  | <0.5             | 0.7   | <0.5  | <0.5                    | 0.3   | <0.5  | <0.5                      | 0.8 | <0.5  | <0.5              | <0.05 | <0.5  | 1                        | 1.8  | <0.5  |
| Angola   | Huila        | 268          | 19          | 7.1  | 6                | 2.1   | <0.5  | 2                       | 0.7   | <0.5  | 4                         | 1.4 | <0.5  | <0.5              | <0.05 | <0.5  | 11                       | 4.2  | 1     |
| Angola   | Kuando       | 463          | 6           | 1.3  | 1                | 0.2   | <0.5  | 1                       | 0.1   | <0.5  | 3                         | 0.7 | <0.5  | <0.5              | <0.05 | <0.5  | 5                        | 1.0  | <0.5  |
| Angola   | Kubango      |              |             |      |                  |       |       |                         |       |       |                           |     |       |                   |       |       |                          |      |       |
| Angola   | Lunda Norte  | 346          | 9           | 2.6  | 2                | 0.5   | <0.5  | 1                       | 0.2   | <0.5  | 3                         | 0.9 | <0.5  | <0.5              | <0.05 | <0.5  | 6                        | 1.7  | <0.5  |
| Angola   | Lunda sul    | 291          | 8           | 2.6  | 1                | 0.5   | <0.5  | 1                       | 0.2   | <0.5  | 3                         | 1.0 | <0.5  | <0.5              | <0.05 | <0.5  | 5                        | 1.7  | <0.5  |
| Angola   | Moxico 1     | 304          | 11          | 3.7  | 2                | 0.5   | <0.5  | 1                       | 0.3   | <0.5  | 2                         | 0.8 | <0.5  | <0.5              | <0.05 | <0.5  | 5                        | 1.7  | <0.5  |
| Angola   | Namibe       | 40           | 10          | 23.9 | 2                | 4.2   | <0.5  | 2                       | 4.5   | <0.5  | 1                         | 1.6 | <0.5  | <0.5              | <0.05 | <0.5  | 4                        | 10.2 | <0.5  |
| Angola   | NY Benguela  | 128          | 32          | 24.8 | 6                | 4.9   | <0.5  | 6                       | 4.7   | 1     | 2                         | 1.6 | <0.5  | <0.5              | <0.05 | <0.5  | 14                       | 11.2 | 1     |
| Angola   | NY Cuanza    | 21           | 4           | 20.4 | <0.5             | 2.3   | <0.5  | 1                       | 3.7   | <0.5  | <0.5                      | 1.4 | <0.5  | <0.5              | <0.05 | <0.5  | 2                        | 7.4  | <0.5  |
| Angola   | Norte        |              |             |      |                  |       |       |                         |       |       |                           |     |       |                   |       |       |                          |      |       |
| Angola   | NY Huila     | 26           | 6           | 24.4 | 1                | 4.3   | <0.5  | 1                       | 4.7   | <0.5  | <0.5                      | 1.7 | <0.5  | <0.5              | <0.05 | <0.5  | 3                        | 10.7 | <0.5  |
| Angola   | NY Lunda     | 75           | 18          | 23.8 | 3                | 4.0   | <0.5  | 3                       | 4.5   | <0.5  | 1                         | 1.5 | <0.5  | <0.5              | <0.05 | <0.5  | 8                        | 10.1 | 1     |
| Angola   | Norte        |              |             |      |                  |       |       |                         |       |       |                           |     |       |                   |       |       |                          |      |       |
| Angola   | NY Moxico 1  | 388          | 62          | 16.1 | 7                | 1.7   | <0.5  | 10                      | 2.6   | 1     | 4                         | 1.0 | <0.5  | <0.5              | <0.05 | <0.5  | 21                       | 5.4  | 2     |
| Angola   | P5Angola*#   | 296          | 63          | 21.2 | 7                | 2.4   | <0.5  | 13                      | 4.3   | 2     | 4                         | 1.3 | <0.5  | <0.5              | <0.05 | <0.5  | 24                       | 8.0  | 2     |
| Angola   | Uige         | 214          | 52          | 24.4 | 10               | 4.8   | <0.5  | 10                      | 4.5   | 1     | 3                         | 1.5 | <0.5  | <0.5              | <0.05 | <0.5  | 23                       | 10.9 | 2     |
| Angola   | Zaire        | 16           | 3           | 16.7 | <0.5             | 1.8   | <0.5  | <0.5                    | 2.7   | <0.5  | <0.5                      | 1.1 | <0.5  | <0.5              | <0.05 | <0.5  | 1                        | 5.6  | <0.5  |
| Burundi  | Bururi       | 497          | 4           | 0.9  | 1                | 0.2   | <0.5  | <0.5                    | 0.1   | <0.5  | 3                         | 0.7 | <0.5  | <0.5              | <0.05 | <0.5  | 5                        | 0.9  | <0.5  |
| Burundi  | Cibitoke-    | 1,187        | 11          | 0.9  | 4                | 0.3   | <0.5  | 1                       | 0.1   | <0.5  | 12                        | 1.0 | <0.5  | <0.5              | <0.05 | <0.5  | 17                       | 1.4  | 1     |
| Burundi  | Bubanza      |              |             |      |                  |       |       |                         |       |       |                           |     |       |                   |       |       |                          |      |       |
| Burundi  | P5Burundi*#  | 936          | 203         | 21.7 | 28               | 3.0   | <0.5  | 42                      | 4.5   | 5     | 13                        | 1.3 | <0.5  | <0.5              | <0.05 | <0.5  | 83                       | 8.9  | 7     |
| Burundi  | Rutana       | 387          | 2           | 0.5  | <0.5             | 0.1   | <0.5  | <0.5                    | 0.1   | <0.5  | 2                         | 0.5 | <0.5  | <0.5              | <0.05 | <0.5  | 3                        | 0.7  | <0.5  |
| Cameroon | Adamaoua 1   | 648          | 9           | 1.4  | 3                | 0.5   | <0.5  | 1                       | 0.1   | <0.5  | 6                         | 0.9 | <0.5  | 7                 | 1.1   | 10    | 17                       | 2.6  | 10    |
| Cameroon | Adamaoua 2   | 589          | 2           | 0.4  | 1                | 0.1   | <0.5  | <0.5                    | <0.05 | <0.5  | 5                         | 0.8 | <0.5  | 5                 | 0.9   | 6     | 11                       | 1.8  | 6     |
| Cameroon | Centre 1     | 598          | 14          | 2.4  | 5                | 0.9   | <0.5  | 1                       | 0.2   | <0.5  | 12                        | 2.0 | 1     | 1                 | 0.1   | 1     | 19                       | 3.1  | 2     |
| Cameroon | Centre 2     | 141          | 4           | 3.2  | 2                | 1.2   | <0.5  | <0.5                    | 0.3   | <0.5  | 2                         | 1.7 | <0.5  | <0.5              | 0.1   | <0.5  | 5                        | 3.3  | 1     |
| Cameroon | Centre 3     | 455          | 3           | 0.6  | 1                | 0.2   | <0.5  | <0.5                    | 0.1   | <0.5  | 5                         | 1.1 | <0.5  | <0.5              | <0.05 | <0.5  | 7                        | 1.5  | <0.5  |
| Cameroon | East         | 166          | 6           | 3.4  | 3                | 1.6   | <0.5  | 1                       | 0.4   | <0.5  | 3                         | 1.8 | <0.5  | <0.5              | 0.1   | <0.5  | 6                        | 3.9  | 1     |
| Cameroon | Far North    | 393          | 1           | 0.2  | <0.5             | <0.05 | <0.5  | <0.5                    | <0.05 | <0.5  | 2                         | 0.4 | <0.5  | 2                 | 0.4   | 1     | 3                        | 0.9  | 2     |

(continued)

| Country  | Project              | Pop. at risk | Mf-positive |       | Palpable nodules |       |       | Reversible skin disease |       |       | Irreversible skin disease |     |       | Eye disease (OED) |       |       | Total all manifestations |      |       |
|----------|----------------------|--------------|-------------|-------|------------------|-------|-------|-------------------------|-------|-------|---------------------------|-----|-------|-------------------|-------|-------|--------------------------|------|-------|
|          |                      |              | N           | %     | N                | %     | DALYs | N                       | %     | DALYs | N                         | %   | DALYs | N                 | %     | DALYs | N                        | %    | DALYs |
| Cameroon | Littoral 1           | 393          | 49          | 12.5  | 18               | 4.7   | <0.5  | 5                       | 1.3   | 1     | 11                        | 2.8 | <0.5  | 1                 | 0.1   | 2     | 35                       | 8.9  | 3     |
| Cameroon | Littoral 2           | 209          | 17          | 7.9   | 7                | 3.2   | <0.5  | 1                       | 0.5   | <0.5  | 6                         | 3.0 | <0.5  | <0.5              | 0.2   | 2     | 14                       | 6.9  | 2     |
| Cameroon | Northern             | 881          | 9           | 1.0   | 4                | 0.4   | <0.5  | 1                       | 0.1   | <0.5  | 10                        | 1.2 | <0.5  | 13                | 1.4   | 22    | 27                       | 3.1  | 23    |
| Cameroon | Northwest            | 1,144        | 18          | 1.6   | 7                | 0.6   | <0.5  | 2                       | 0.1   | <0.5  | 17                        | 1.4 | 1     | <0.5              | <0.05 | 1     | 26                       | 2.3  | 2     |
| Cameroon | P20Cameroon*         | 211          | 64          | 30.5  | 25               | 11.8  | <0.5  | 10                      | 4.5   | 1     | 6                         | 2.7 | <0.5  | <0.5              | 0.1   | 1     | 40                       | 19.1 | 3     |
| Cameroon | P5Cameroon*#         | 2,097        | 482         | 23.0  | 72               | 3.4   | 1     | 102                     | 4.9   | 13    | 31                        | 1.5 | 1     | <0.5              | <0.05 | 1     | 205                      | 9.8  | 16    |
| Cameroon | South                | 418          | 4           | 1.0   | 1                | 0.3   | <0.5  | <0.5                    | 0.1   | <0.5  | 4                         | 0.9 | <0.5  | <0.5              | <0.05 | <0.5  | 6                        | 1.4  | <0.5  |
| Cameroon | South West 1         | 548          | 16          | 3.0   | 7                | 1.2   | <0.5  | 1                       | 0.2   | <0.5  | 13                        | 2.4 | 1     | 1                 | 0.1   | 1     | 22                       | 3.9  | 2     |
| Cameroon | South West 2         | 373          | 4           | 1.0   | 2                | 0.5   | <0.5  | <0.5                    | 0.1   | <0.5  | 7                         | 2.0 | <0.5  | <0.5              | 0.1   | 1     | 10                       | 2.6  | 1     |
| Cameroon | Western              | 2,292        | 127         | 5.5   | 50               | 2.2   | 1     | 10                      | 0.4   | 2     | 82                        | 3.6 | 4     | 6                 | 0.3   | 17    | 148                      | 6.5  | 24    |
| CAR      | CAR region 3         | 598          | 17          | 2.9   | 5                | 0.8   | <0.5  | 1                       | 0.1   | <0.5  | 9                         | 1.6 | <0.5  | 12                | 2.0   | 19    | 26                       | 4.4  | 20    |
| CAR      | CAR region 4         | 623          | 5           | 0.8   | 1                | 0.2   | <0.5  | <0.5                    | <0.05 | <0.5  | 5                         | 0.8 | <0.5  | 6                 | 0.9   | 7     | 12                       | 2.0  | 7     |
| CAR      | CAR region 5         | 576          | 2           | 0.3   | <0.5             | 0.1   | <0.5  | <0.5                    | <0.05 | <0.5  | 3                         | 0.6 | <0.5  | 4                 | 0.7   | 4     | 8                        | 1.3  | 4     |
| CAR      | CAR region 6         | 887          | 18          | 2.0   | 4                | 0.5   | <0.5  | 1                       | 0.1   | <0.5  | 10                        | 1.2 | <0.5  | 12                | 1.3   | 17    | 27                       | 3.1  | 18    |
| CAR      | P20CAR*              | 87           | 34          | 39.2  | 12               | 13.4  | <0.5  | 8                       | 8.9   | 1     | 2                         | 2.8 | <0.5  | <0.5              | 0.1   | <0.5  | 22                       | 25.3 | 1     |
| CAR      | P5CAR*#              | 198          | 50          | 25.3  | 9                | 4.6   | <0.5  | 11                      | 5.6   | 1     | 3                         | 1.6 | <0.5  | <0.5              | <0.05 | <0.5  | 24                       | 11.9 | 2     |
| Chad     | Chad                 | 2,409        | 1           | <0.05 | <0.5             | <0.05 | <0.5  | <0.5                    | <0.05 | <0.5  | 14                        | 0.6 | <0.5  | 14                | 0.6   | 14    | 28                       | 1.2  | 15    |
| Chad     | P5Chad*#             | 300          | 74          | 24.7  | 16               | 5.3   | <0.5  | 15                      | 5.1   | 2     | 4                         | 1.4 | <0.5  | 5                 | 1.7   | 9     | 40                       | 13.5 | 12    |
| Chad     | P5Chad<br>propext*#  | 172          | 34          | 20.0  | 5                | 2.7   | <0.5  | 7                       | 3.8   | 1     | 2                         | 1.1 | <0.5  | 2                 | 1.3   | 4     | 15                       | 8.9  | 5     |
| Congo    | Congo 1              | 1,099        | 3           | 0.3   | 1                | 0.1   | <0.5  | <0.5                    | <0.05 | <0.5  | 7                         | 0.7 | <0.5  | <0.5              | <0.05 | <0.5  | 9                        | 0.8  | 1     |
| Congo    | P20Congo*            | 48           | 18          | 37.4  | 8                | 17.3  | <0.5  | 3                       | 5.5   | <0.5  | 2                         | 4.0 | <0.5  | <0.5              | 0.2   | <0.5  | 13                       | 26.9 | 1     |
| Congo    | P5Congo*#            | 645          | 166         | 25.7  | 31               | 4.7   | <0.5  | 40                      | 6.1   | 5     | 12                        | 1.8 | <0.5  | <0.5              | <0.05 | 1     | 82                       | 12.7 | 6     |
| DRC      | Bandundu             | 8            | <0.5        | 0.5   | <0.5             | 0.2   | <0.5  | <0.5                    | 0.1   | <0.5  | <0.5                      | 0.8 | <0.5  | <0.5              | <0.05 | <0.5  | <0.5                     | 1.0  | <0.5  |
| DRC      | Bas-Congo            | 1,813        | 57          | 3.1   | 17               | 0.9   | <0.5  | 5                       | 0.3   | 1     | 23                        | 1.2 | 1     | <0.5              | <0.05 | 1     | 44                       | 2.4  | 3     |
| DRC      | Kinshasa<br>Butembo- | 1,127        | 127         | 11.3  | 45               | 4.0   | <0.5  | 13                      | 1.2   | 2     | 22                        | 2.0 | 1     | 1                 | 0.1   | 2     | 81                       | 7.2  | 5     |
| DRC      | Beni                 |              |             |       |                  |       |       |                         |       |       |                           |     |       |                   |       |       |                          |      |       |
| DRC      | Equateur-Kiri        | 1,497        | 52          | 3.5   | 21               | 1.4   | <0.5  | 6                       | 0.4   | 1     | 23                        | 1.5 | 1     | 1                 | <0.05 | 1     | 50                       | 3.4  | 3     |
| DRC      | Ituri-Nord           | 1,515        | 306         | 20.2  | 172              | 11.4  | 2     | 39                      | 2.6   | 7     | 77                        | 5.1 | 4     | 8                 | 0.5   | 28    | 297                      | 19.6 | 41    |
| DRC      | Ituri-Sud            | 1,385        | 462         | 33.4  | 255              | 18.4  | 3     | 78                      | 5.7   | 12    | 71                        | 5.2 | 4     | 7                 | 0.5   | 26    | 412                      | 29.7 | 45    |
| DRC      | Kasai                | 12,990       | 608         | 4.7   | 260              | 2.0   | 3     | 55                      | 0.4   | 9     | 212                       | 1.6 | 10    | 12                | 0.1   | 38    | 538                      | 4.1  | 60    |
| DRC      | Kasongo              | 1,627        | 81          | 5.0   | 25               | 1.6   | <0.5  | 8                       | 0.5   | 1     | 21                        | 1.3 | 1     | 1                 | <0.05 | 2     | 55                       | 3.4  | 4     |

(continued)

| Country            | Project                    | Pop. at risk | Mf-positive |       | Palpable nodules |       |       | Reversible skin disease |       |       | Irreversible skin disease |     |       | Eye disease (OED) |       |       | Total all manifestations |      |       |
|--------------------|----------------------------|--------------|-------------|-------|------------------|-------|-------|-------------------------|-------|-------|---------------------------|-----|-------|-------------------|-------|-------|--------------------------|------|-------|
|                    |                            |              | N           | %     | N                | %     | DALYs | N                       | %     | DALYs | N                         | %   | DALYs | N                 | %     | DALYs | N                        | %    | DALYs |
| DRC                | Katanga-Nord               | 756          | 37          | 4.9   | 17               | 2.2   | <0.5  | 4                       | 0.5   | 1     | 13                        | 1.8 | 1     | 1                 | 0.1   | 2     | 35                       | 4.6  | 4     |
| DRC                | Katanga-Sud                | 837          | 52          | 6.2   | 23               | 2.7   | <0.5  | 6                       | 0.7   | 1     | 16                        | 1.9 | 1     | 1                 | 0.1   | 3     | 45                       | 5.3  | 5     |
| DRC                | Lualaba                    | 272          | 7           | 2.5   | 3                | 1.0   | <0.5  | 1                       | 0.3   | <0.5  | 4                         | 1.5 | <0.5  | <0.5              | <0.05 | <0.5  | 8                        | 2.8  | 1     |
| DRC                | Lubutu                     | 403          | 60          | 14.8  | 24               | 6.1   | <0.5  | 6                       | 1.6   | 1     | 12                        | 3.1 | 1     | 1                 | 0.1   | 1     | 44                       | 10.8 | 3     |
| DRC                | Masisi-<br>Walikale        | 1,265        | 200         | 15.8  | 91               | 7.2   | 1     | 24                      | 1.9   | 4     | 39                        | 3.0 | 2     | 2                 | 0.2   | 8     | 156                      | 12.3 | 15    |
| DRC                | Mongala                    | 1,758        | 59          | 3.4   | 23               | 1.3   | <0.5  | 6                       | 0.3   | 1     | 24                        | 1.3 | 1     | 1                 | <0.05 | 2     | 54                       | 3.0  | 4     |
| DRC                | NY                         | 549          | 91          | 16.5  | 16               | 2.9   | <0.5  | 11                      | 2.0   | 2     | 7                         | 1.3 | <0.5  | <0.5              | <0.05 | <0.5  | 34                       | 6.2  | 2     |
| DRC                | Katanga-Nord<br>NY Lualaba | 1,187        | 229         | 19.3  | 46               | 3.9   | <0.5  | 28                      | 2.4   | 4     | 18                        | 1.5 | 1     | <0.5              | <0.05 | <0.5  | 93                       | 7.8  | 6     |
| DRC                | NY Masisi-<br>Walikale     | 66           | 17          | 26.5  | 5                | 8.0   | <0.5  | 2                       | 3.5   | <0.5  | 1                         | 2.0 | <0.5  | <0.5              | <0.05 | <0.5  | 9                        | 13.6 | 1     |
| DRC                | NY Rutshuru-<br>Ngoma      | 10           | 2           | 24.3  | 1                | 9.4   | <0.5  | <0.5                    | 2.7   | <0.5  | <0.5                      | 2.6 | <0.5  | <0.5              | 0.1   | <0.5  | 2                        | 14.8 | <0.5  |
| DRC                | NY Sankuru                 | 566          | 83          | 14.6  | 21               | 3.6   | <0.5  | 10                      | 1.7   | 2     | 9                         | 1.5 | <0.5  | <0.5              | 0.1   | 1     | 39                       | 6.9  | 3     |
| DRC                | NY Ueles                   | 193          | 81          | 42.1  | 47               | 24.3  | <0.5  | 17                      | 9.0   | 3     | 12                        | 6.0 | 1     | 1                 | 0.7   | 5     | 77                       | 39.9 | 9     |
| DRC                | P20DRC*                    | 2,841        | 1,268       | 44.6  | 532              | 18.7  | 6     | 352                     | 12.4  | 45    | 114                       | 4.0 | 5     | 8                 | 0.3   | 28    | 1,005                    | 35.4 | 84    |
| DRC                | P5DRC*#                    | 9,033        | 2,113       | 23.4  | 321              | 3.6   | 3     | 448                     | 5.0   | 57    | 134                       | 1.5 | 5     | 2                 | <0.05 | 4     | 905                      | 10.0 | 70    |
| DRC                | Rutshuru-<br>Ngoma         | 796          | 28          | 3.5   | 9                | 1.1   | <0.5  | 3                       | 0.3   | <0.5  | 10                        | 1.3 | <0.5  | <0.5              | <0.05 | <0.5  | 21                       | 2.7  | 1     |
| DRC                | Sankuru                    | 1,289        | 98          | 7.6   | 48               | 3.7   | 1     | 9                       | 0.7   | 2     | 35                        | 2.7 | 2     | 3                 | 0.2   | 11    | 96                       | 7.4  | 15    |
| DRC                | Tshopo                     | 1,925        | 296         | 15.4  | 124              | 6.4   | 1     | 33                      | 1.7   | 5     | 56                        | 2.9 | 3     | 4                 | 0.2   | 12    | 217                      | 11.3 | 21    |
| DRC                | Tshuapa                    | 1,715        | 264         | 15.4  | 105              | 6.1   | 1     | 30                      | 1.8   | 5     | 49                        | 2.9 | 2     | 3                 | 0.2   | 9     | 187                      | 10.9 | 17    |
| DRC                | Ubangi-Nord                | 966          | 157         | 16.2  | 71               | 7.4   | 1     | 19                      | 2.0   | 3     | 28                        | 2.9 | 1     | 2                 | 0.2   | 8     | 121                      | 12.5 | 13    |
| DRC                | Ubangi-Sud                 | 1,629        | 80          | 4.9   | 21               | 1.3   | <0.5  | 7                       | 0.4   | 1     | 19                        | 1.2 | 1     | <0.5              | <0.05 | 1     | 47                       | 2.9  | 3     |
| DRC                | Ueles                      | 1,900        | 268         | 14.1  | 122              | 6.4   | 1     | 23                      | 1.2   | 4     | 72                        | 3.8 | 4     | 6                 | 0.3   | 22    | 222                      | 11.7 | 31    |
| Eq.                | Bioko                      | 134          | <0.5        | <0.05 | <0.5             | <0.05 | <0.5  | <0.5                    | <0.05 | <0.5  | 4                         | 2.9 | <0.5  | <0.5              | 0.3   | 1     | 4                        | 3.2  | 1     |
| Guinea<br>Eq.      | P5EqGuinea *#              | 314          | <0.5        | <0.05 | <0.5             | <0.05 | <0.5  | <0.5                    | <0.05 | <0.5  | 1                         | 0.4 | <0.5  | <0.5              | <0.05 | <0.5  | 1                        | 0.4  | <0.5  |
| Guinea<br>Ethiopia | Assosa                     | 716          | 123         | 17.2  | 32               | 4.5   | <0.5  | 30                      | 4.2   | 4     | 11                        | 1.5 | <0.5  | <0.5              | <0.05 | <0.5  | 74                       | 10.3 | 5     |
| Ethiopia           | Bench-Maji                 | 947          | 6           | 0.6   | 2                | 0.2   | <0.5  | 1                       | 0.1   | <0.5  | 10                        | 1.1 | <0.5  | <0.5              | <0.05 | <0.5  | 13                       | 1.4  | 1     |
| Ethiopia           | East Wellega               | 1,160        | 9           | 0.8   | 4                | 0.3   | <0.5  | 1                       | 0.1   | <0.5  | 12                        | 1.0 | <0.5  | <0.5              | <0.05 | <0.5  | 17                       | 1.5  | 1     |
| Ethiopia           | Gambella                   | 139          | 1           | 0.9   | <0.5             | 0.3   | <0.5  | <0.5                    | 0.1   | <0.5  | 2                         | 1.1 | <0.5  | <0.5              | <0.05 | <0.5  | 2                        | 1.5  | <0.5  |



(continued)

| Country  | Project        | Pop. at risk | Mf-positive |       | Palpable nodules |       |       | Reversible skin disease |       |       | Irreversible skin disease |     |       | Eye disease (OED) |       |       | Total all manifestations |      |       |
|----------|----------------|--------------|-------------|-------|------------------|-------|-------|-------------------------|-------|-------|---------------------------|-----|-------|-------------------|-------|-------|--------------------------|------|-------|
|          |                |              | N           | %     | N                | %     | DALYs | N                       | %     | DALYs | N                         | %   | DALYs | N                 | %     | DALYs | N                        | %    | DALYs |
| Ethiopia | Horo Guduru    | 68           | 22          | 32.0  | 6                | 8.7   | <0.5  | 4                       | 6.0   | 1     | 1                         | 2.0 | <0.5  | <0.5              | <0.05 | <0.5  | 11                       | 16.8 | 1     |
| Ethiopia | Illubabor      | 981          | 6           | 0.6   | 3                | 0.3   | <0.5  | 1                       | 0.1   | <0.5  | 11                        | 1.1 | <0.5  | <0.5              | <0.05 | <0.5  | 15                       | 1.5  | 1     |
| Ethiopia | Jimma          | 1,158        | 1           | 0.1   | 1                | 0.1   | <0.5  | <0.5                    | <0.05 | <0.5  | 8                         | 0.7 | <0.5  | <0.5              | <0.05 | <0.5  | 9                        | 0.8  | <0.5  |
| Ethiopia | Kaffa-Sheka    | 1,645        | 7           | 0.4   | 3                | 0.2   | <0.5  | 1                       | <0.05 | <0.5  | 21                        | 1.3 | 1     | <0.5              | <0.05 | 1     | 25                       | 1.5  | 2     |
| Ethiopia | Kamashi        | 612          | 55          | 9.0   | 52               | 8.4   | 1     | 20                      | 3.2   | 3     | 14                        | 2.2 | 1     | 1                 | 0.1   | 2     | 85                       | 13.9 | 6     |
| Ethiopia | Metekel        | 209          | 2           | 0.8   | <0.5             | 0.2   | <0.5  | <0.5                    | 0.1   | <0.5  | 2                         | 0.8 | <0.5  | <0.5              | <0.05 | <0.5  | 2                        | 1.1  | <0.5  |
| Ethiopia | North Gondar   | 406          | 2           | 0.5   | 1                | 0.2   | <0.5  | <0.5                    | 0.1   | <0.5  | 3                         | 0.8 | <0.5  | <0.5              | <0.05 | <0.5  | 4                        | 1.0  | <0.5  |
| Ethiopia | NY East        | 371          | 96          | 25.8  | 34               | 9.2   | <0.5  | 13                      | 3.4   | 2     | 8                         | 2.2 | <0.5  | <0.5              | 0.1   | 1     | 55                       | 14.9 | 3     |
| Ethiopia | Wellega        |              |             |       |                  |       |       |                         |       |       |                           |     |       |                   |       |       |                          |      |       |
| Ethiopia | NY West        | 377          | 18          | 4.8   | 9                | 2.5   | <0.5  | 5                       | 1.3   | 1     | 4                         | 1.1 | <0.5  | <0.5              | <0.05 | <0.5  | 18                       | 4.9  | 1     |
| Ethiopia | Wellega        |              |             |       |                  |       |       |                         |       |       |                           |     |       |                   |       |       |                          |      |       |
| Ethiopia | P20Ethiopia*   | 431          | 168         | 39.0  | 60               | 14.0  | 1     | 38                      | 8.8   | 5     | 12                        | 2.8 | 1     | <0.5              | 0.1   | 1     | 111                      | 25.7 | 8     |
| Ethiopia | P5Ethiopia*    | 4,553        | 1,059       | 23.3  | 161              | 3.5   | 2     | 219                     | 4.8   | 28    | 66                        | 1.5 | 2     | 1                 | <0.05 | 2     | 448                      | 9.8  | 34    |
| Ethiopia | West Shewa     | 75           | 16          | 21.0  | 2                | 2.6   | <0.5  | 3                       | 4.2   | <0.5  | 1                         | 1.3 | <0.5  | <0.5              | <0.05 | <0.5  | 6                        | 8.1  | <0.5  |
| Ethiopia | West Wellega   | 1,332        | 22          | 1.7   | 10               | 0.7   | <0.5  | 3                       | 0.2   | <0.5  | 21                        | 1.6 | 1     | 1                 | <0.05 | 1     | 34                       | 2.5  | 3     |
| Gabon    | P5Gabon*#      | 112          | 22          | 20.0  | 3                | 2.3   | <0.5  | 4                       | 3.8   | 1     | 1                         | 1.2 | <0.5  | <0.5              | <0.05 | <0.5  | 8                        | 7.3  | 1     |
| Liberia  | All_Liberia    | 1,987        | 5           | 0.3   | 2                | 0.1   | <0.5  | 1                       | <0.05 | <0.5  | 13                        | 0.7 | <0.5  | <0.5              | <0.05 | <0.5  | 15                       | 0.8  | 1     |
| Malawi   | Malawi         | 1,501        | 1           | 0.1   | <0.5             | <0.05 | <0.5  | <0.5                    | <0.05 | <0.5  | 7                         | 0.5 | <0.5  | <0.5              | <0.05 | <0.5  | 7                        | 0.5  | <0.5  |
| Malawi   | Extension      |              |             |       |                  |       |       |                         |       |       |                           |     |       |                   |       |       |                          |      |       |
| Malawi   | Thyolo         | 1,145        | <0.5        | <0.05 | <0.5             | <0.05 | <0.5  | <0.5                    | <0.05 | <0.5  | 6                         | 0.5 | <0.5  | <0.5              | <0.05 | <0.5  | 6                        | 0.5  | <0.5  |
| Malawi   | Mwanza         |              |             |       |                  |       |       |                         |       |       |                           |     |       |                   |       |       |                          |      |       |
| Mozamb.  | P20Mozambique* | 21           | 4           | 16.8  | <0.5             | 1.9   | <0.5  | 1                       | 2.8   | <0.5  | <0.5                      | 1.0 | <0.5  | <0.5              | <0.05 | <0.5  | 1                        | 5.7  | <0.5  |
| Mozamb.  | P5Mozambique*  | 61           | 11          | 17.3  | 1                | 1.7   | <0.5  | 2                       | 3.3   | <0.5  | 1                         | 1.0 | <0.5  | <0.5              | <0.05 | <0.5  | 4                        | 6.0  | <0.5  |
| Nigeria  | Adamawa        | 2,298        | <0.5        | <0.05 | <0.5             | <0.05 | <0.5  | <0.5                    | <0.05 | <0.5  | 11                        | 0.5 | <0.5  | 10                | 0.4   | 8     | 21                       | 0.9  | 9     |
| Nigeria  | Akwa Ibom      | 39           | <0.5        | 0.2   | <0.5             | 0.1   | <0.5  | <0.5                    | <0.05 | <0.5  | <0.5                      | 0.6 | <0.5  | <0.5              | <0.05 | <0.5  | <0.5                     | 0.6  | <0.5  |
| Nigeria  | Bauchi         | 2,355        | 5           | 0.2   | 1                | <0.05 | <0.5  | 1                       | <0.05 | <0.5  | 11                        | 0.5 | <0.5  | 12                | 0.5   | 11    | 25                       | 1.1  | 12    |
| Nigeria  | Benue          | 4,644        | 41          | 0.9   | 16               | 0.3   | <0.5  | 4                       | 0.1   | 1     | 51                        | 1.1 | 2     | 1                 | <0.05 | 2     | 72                       | 1.5  | 5     |
| Nigeria  | Borno          | 1,851        | <0.5        | <0.05 | <0.5             | <0.05 | <0.5  | <0.5                    | <0.05 | <0.5  | 5                         | 0.3 | <0.5  | 6                 | 0.3   | 4     | 11                       | 0.6  | 4     |
| Nigeria  | Cross River    | 1,679        | 1           | <0.05 | <0.5             | <0.05 | <0.5  | <0.5                    | <0.05 | <0.5  | 10                        | 0.6 | <0.5  | <0.5              | <0.05 | <0.5  | 11                       | 0.7  | 1     |
| Nigeria  | Edo Delta      | 2,158        | <0.5        | <0.05 | <0.5             | <0.05 | <0.5  | <0.5                    | <0.05 | <0.5  | 11                        | 0.5 | <0.5  | <0.5              | <0.05 | <0.5  | 11                       | 0.5  | <0.5  |
| Nigeria  | Ekiti          | 2,913        | 1           | <0.05 | <0.5             | <0.05 | <0.5  | <0.5                    | <0.05 | <0.5  | 11                        | 0.4 | <0.5  | <0.5              | <0.05 | <0.5  | 11                       | 0.4  | <0.5  |
| Nigeria  | Enugu          | 3,207        | 5           | 0.2   | 3                | 0.1   | <0.5  | <0.5                    | <0.05 | <0.5  | 40                        | 1.2 | 2     | 1                 | <0.05 | 2     | 44                       | 1.4  | 4     |
| Nigeria  | Anambra        |              |             |       |                  |       |       |                         |       |       |                           |     |       |                   |       |       |                          |      |       |
| Nigeria  | Ebony          |              |             |       |                  |       |       |                         |       |       |                           |     |       |                   |       |       |                          |      |       |

(continued)

| Country     | Project                   | Pop. at risk | Mf-positive |       | Palpable nodules |       |       | Reversible skin disease |       |       | Irreversible skin disease |     |       | Eye disease (OED) |       |       | Total all manifestations |      |       |
|-------------|---------------------------|--------------|-------------|-------|------------------|-------|-------|-------------------------|-------|-------|---------------------------|-----|-------|-------------------|-------|-------|--------------------------|------|-------|
|             |                           |              | N           | %     | N                | %     | DALYs | N                       | %     | DALYs | N                         | %   | DALYs | N                 | %     | DALYs | N                        | %    | DALYs |
| Nigeria     | FCT                       | 681          | <0.5        | <0.05 | <0.5             | <0.05 | <0.5  | <0.5                    | <0.05 | <0.5  | 3                         | 0.4 | <0.5  | <0.5              | <0.05 | <0.5  | 3                        | 0.5  | <0.5  |
| Nigeria     | Gombe                     | 2,559        | 2           | 0.1   | 1                | <0.05 | <0.5  | <0.5                    | <0.05 | <0.5  | 12                        | 0.5 | <0.5  | 13                | 0.5   | 10    | 26                       | 1.0  | 11    |
| Nigeria     | Imo Abia                  | 1,768        | 5           | 0.3   | 2                | 0.1   | <0.5  | 1                       | <0.05 | <0.5  | 11                        | 0.6 | <0.5  | <0.5              | <0.05 | <0.5  | 13                       | 0.7  | 1     |
| Nigeria     | Jigawa                    | 479          | <0.5        | 0.1   | <0.5             | <0.05 | <0.5  | <0.5                    | <0.05 | <0.5  | 2                         | 0.4 | <0.5  | 2                 | 0.4   | 2     | 4                        | 0.9  | 2     |
| Nigeria     | Kaduna                    | 3,723        | <0.5        | <0.05 | <0.5             | <0.05 | <0.5  | <0.5                    | <0.05 | <0.5  | 9                         | 0.2 | <0.5  | 9                 | 0.2   | 5     | 17                       | 0.5  | 6     |
| Nigeria     | Kano                      | 1,329        | <0.5        | <0.05 | <0.5             | <0.05 | <0.5  | <0.5                    | <0.05 | <0.5  | 4                         | 0.3 | <0.5  | 5                 | 0.3   | 4     | 9                        | 0.7  | 4     |
| Nigeria     | Kebbi                     | 279          | <0.5        | <0.05 | <0.5             | <0.05 | <0.5  | <0.5                    | <0.05 | <0.5  | 1                         | 0.3 | <0.5  | 1                 | 0.3   | 1     | 2                        | 0.7  | 1     |
| Nigeria     | Kogi                      | 2,399        | <0.5        | <0.05 | <0.5             | <0.05 | <0.5  | <0.5                    | <0.05 | <0.5  | 10                        | 0.4 | <0.5  | <0.5              | <0.05 | <0.5  | 11                       | 0.4  | <0.5  |
| Nigeria     | Kwara                     | 2,027        | <0.5        | <0.05 | <0.5             | <0.05 | <0.5  | <0.5                    | <0.05 | <0.5  | 9                         | 0.4 | <0.5  | 9                 | 0.5   | 9     | 19                       | 0.9  | 9     |
| Nigeria     | Niger                     | 3,564        | 2           | 0.1   | 1                | <0.05 | <0.5  | <0.5                    | <0.05 | <0.5  | 15                        | 0.4 | 1     | 15                | 0.4   | 11    | 30                       | 0.8  | 12    |
| Nigeria     | Ogun                      | 462          | <0.5        | <0.05 | <0.5             | <0.05 | <0.5  | <0.5                    | <0.05 | <0.5  | 3                         | 0.6 | <0.5  | <0.5              | <0.05 | <0.5  | 3                        | 0.6  | <0.5  |
| Nigeria     | Ondo                      | 1,837        | <0.5        | <0.05 | <0.5             | <0.05 | <0.5  | <0.5                    | <0.05 | <0.5  | 8                         | 0.4 | <0.5  | <0.5              | <0.05 | <0.5  | 8                        | 0.4  | <0.5  |
| Nigeria     | Osun                      | 2,167        | 2           | 0.1   | 1                | <0.05 | <0.5  | <0.5                    | <0.05 | <0.5  | 9                         | 0.4 | <0.5  | <0.5              | <0.05 | <0.5  | 10                       | 0.5  | <0.5  |
| Nigeria     | Oyo                       | 1,478        | 2           | 0.1   | 1                | <0.05 | <0.5  | <0.5                    | <0.05 | <0.5  | 5                         | 0.3 | <0.5  | 6                 | 0.4   | 5     | 11                       | 0.8  | 5     |
| Nigeria     | P20Nigeria *              | 298          | 115         | 38.5  | 38               | 12.8  | <0.5  | 24                      | 8.1   | 3     | 8                         | 2.6 | <0.5  | <0.5              | 0.1   | <0.5  | 70                       | 23.6 | 4     |
| Nigeria     | P5Nigeria *#              | 10,135       | 1,892       | 18.7  | 210              | 2.1   | 2     | 358                     | 3.5   | 46    | 109                       | 1.1 | 4     | 131               | 1.3   | 197   | 808                      | 8.0  | 249   |
| Nigeria     | Plateau                   | 2,055        | <0.5        | <0.05 | <0.5             | <0.05 | <0.5  | <0.5                    | <0.05 | <0.5  | 9                         | 0.4 | <0.5  | 9                 | 0.4   | 7     | 18                       | 0.9  | 7     |
| Nigeria     | Nassarawa Plateau         | 2,080        | <0.5        | <0.05 | <0.5             | <0.05 | <0.5  | <0.5                    | <0.05 | <0.5  | 12                        | 0.6 | <0.5  | 12                | 0.6   | 12    | 24                       | 1.2  | 13    |
| Nigeria     | Nassarawa LF Taraba       | 2,236        | 9           | 0.4   | 4                | 0.2   | <0.5  | 1                       | <0.05 | <0.5  | 15                        | 0.7 | 1     | 17                | 0.8   | 21    | 37                       | 1.6  | 22    |
| Nigeria     | Yobe                      | 827          | <0.5        | <0.05 | <0.5             | <0.05 | <0.5  | <0.5                    | <0.05 | <0.5  | 2                         | 0.3 | <0.5  | 2                 | 0.3   | 2     | 5                        | 0.6  | 2     |
| Nigeria     | Zamfara                   | 384          | <0.5        | <0.05 | <0.5             | <0.05 | <0.5  | <0.5                    | <0.05 | <0.5  | 1                         | 0.4 | <0.5  | 1                 | 0.4   | 1     | 3                        | 0.7  | 1     |
| South Sudan | East Bahr El Ghazal       | 736          | 46          | 6.2   | 10               | 1.3   | <0.5  | 4                       | 0.5   | 1     | 7                         | 0.9 | <0.5  | 8                 | 1.1   | 11    | 29                       | 3.9  | 12    |
| Sudan       | South East Equatoria      | 1,309        | 143         | 10.9  | 24               | 1.8   | <0.5  | 15                      | 1.2   | 2     | 14                        | 1.1 | <0.5  | 16                | 1.2   | 23    | 69                       | 5.2  | 26    |
| Sudan       | South P20SouthSudan*      | 37           | 13          | 36.5  | 4                | 10.6  | <0.5  | 3                       | 8.5   | <0.5  | 1                         | 2.2 | <0.5  | 1                 | 2.9   | 2     | 9                        | 24.2 | 3     |
| Sudan       | South P5SouthSudan*#      | 1,015        | 183         | 18.0  | 20               | 1.9   | <0.5  | 34                      | 3.4   | 4     | 11                        | 1.1 | <0.5  | 12                | 1.2   | 19    | 77                       | 7.6  | 24    |
| Sudan       | South Upper Nile          | 686          | 60          | 8.7   | 7                | 1.0   | <0.5  | 6                       | 0.9   | 1     | 6                         | 0.8 | <0.5  | 6                 | 0.9   | 8     | 25                       | 3.7  | 9     |
| Sudan       | South West Bahr El Ghazal | 3,968        | 509         | 12.8  | 141              | 3.5   | 1     | 63                      | 1.6   | 9     | 51                        | 1.3 | 2     | 63                | 1.6   | 133   | 317                      | 8.0  | 145   |

(continued)

| Country      | Project                | Pop. at risk   | Mf-positive   |            | Palpable nodules |            |           | Reversible skin disease |            |            | Irreversible skin disease |            |           | Eye disease (OED) |            |            | Total all manifestations |            |              |
|--------------|------------------------|----------------|---------------|------------|------------------|------------|-----------|-------------------------|------------|------------|---------------------------|------------|-----------|-------------------|------------|------------|--------------------------|------------|--------------|
|              |                        |                | N             | %          | N                | %          | DALYs     | N                       | %          | DALYs      | N                         | %          | DALYs     | N                 | %          | DALYs      | N                        | %          | DALYs        |
| South Sudan  | West Equatoria         | 936            | 26            | 2.7        | 7                | 0.8        | <0.5      | 2                       | 0.2        | <0.5       | 10                        | 1.0        | <0.5      | 11                | 1.2        | 14         | 30                       | 3.2        | 15           |
| Sudan        | P5Sudan*#              | 286            | 61            | 21.2       | 8                | 2.7        | <0.5      | 13                      | 4.4        | 2          | 4                         | 1.3        | <0.5      | 5                 | 1.6        | 8          | 28                       | 10.0       | 9            |
| Sudan        | Sudan                  | 270            | 2             | 0.7        | <0.5             | 0.1        | <0.5      | <0.5                    | 0.1        | <0.5       | 2                         | 0.6        | <0.5      | 2                 | 0.6        | 2          | 4                        | 1.4        | 2            |
| Sudan        | Sudan Abu Hamed Kilosa | 270            | 2             | 0.7        | <0.5             | 0.1        | <0.5      | <0.5                    | 0.1        | <0.5       | 2                         | 0.6        | <0.5      | 2                 | 0.6        | 2          | 4                        | 1.4        | 2            |
| Tanzania     | Mahenge                | 647            | 1             | 0.1        | <0.5             | <0.05      | <0.5      | <0.5                    | <0.05      | <0.5       | 5                         | 0.7        | <0.5      | <0.5              | <0.05      | <0.5       | 5                        | 0.8        | <0.5         |
| Tanzania     | Morogoro               | 647            | 8             | 1.3        | 3                | 0.5        | <0.5      | 1                       | 0.1        | <0.5       | 8                         | 1.3        | <0.5      | <0.5              | 0.1        | 1          | 13                       | 1.9        | 1            |
| Tanzania     | P5Tanzania*            | 463            | 2             | 0.3        | 1                | 0.1        | <0.5      | <0.5                    | <0.05      | <0.5       | 3                         | 0.7        | <0.5      | <0.5              | <0.05      | <0.5       | 4                        | 0.9        | <0.5         |
| Tanzania     | Ruvuma                 | 1,174          | 296           | 25.2       | 50               | 4.3        | 1         | 66                      | 5.6        | 8          | 19                        | 1.7        | 1         | <0.5              | <0.05      | 1          | 136                      | 11.6       | 10           |
| Tanzania     | Tanga                  | 511            | 28            | 5.4        | 12               | 2.4        | <0.5      | 2                       | 0.3        | <0.5       | 13                        | 2.5        | 1         | 1                 | 0.2        | 3          | 27                       | 5.3        | 4            |
| Tanzania     | Tukuyu                 | 401            | <0.5          | 0.1        | <0.5             | <0.05      | <0.5      | <0.5                    | <0.05      | <0.5       | 2                         | 0.6        | <0.5      | <0.5              | <0.05      | <0.5       | 2                        | 0.6        | <0.5         |
| Tanzania     | Tunduru                | 147            | <0.5          | 0.3        | <0.5             | 0.1        | <0.5      | <0.5                    | <0.05      | <0.5       | 2                         | 1.1        | <0.5      | <0.5              | <0.05      | <0.5       | 2                        | 1.2        | <0.5         |
| Uganda       | P5Uganda*              | 159            | 3             | 1.9        | 1                | 0.9        | <0.5      | <0.5                    | 0.2        | <0.5       | 3                         | 1.7        | <0.5      | <0.5              | 0.1        | <0.5       | 5                        | 2.9        | <0.5         |
| Uganda       | Phase 1                | 295            | <0.5          | <0.05      | <0.5             | <0.05      | <0.5      | <0.5                    | <0.05      | <0.5       | 1                         | 0.4        | <0.5      | <0.5              | <0.05      | <0.5       | 1                        | 0.4        | <0.5         |
| Uganda       | Phase 2                | 463            | <0.5          | <0.05      | <0.5             | <0.05      | <0.5      | <0.5                    | <0.05      | <0.5       | 2                         | 0.5        | <0.5      | <0.5              | <0.05      | <0.5       | 2                        | 0.5        | <0.5         |
| Uganda       | Phase 3                | 900            | <0.5          | <0.05      | <0.5             | <0.05      | <0.5      | <0.5                    | <0.05      | <0.5       | 3                         | 0.4        | <0.5      | <0.5              | <0.05      | <0.5       | 3                        | 0.4        | <0.5         |
| Uganda       | Phase 4                | 1,660          | 3             | 0.2        | 4                | 0.2        | <0.5      | 1                       | 0.1        | <0.5       | 25                        | 1.5        | 1         | 1                 | 0.1        | 3          | 31                       | 1.9        | 5            |
| Uganda       | Phase 5                | 940            | <0.5          | <0.05      | <0.5             | <0.05      | <0.5      | <0.5                    | <0.05      | <0.5       | 4                         | 0.5        | <0.5      | <0.5              | <0.05      | <0.5       | 4                        | 0.5        | <0.5         |
| Uganda       | Phase 5                | 605            | 5             | 0.8        | 6                | 1.0        | <0.5      | 2                       | 0.3        | <0.5       | 5                         | 0.9        | <0.5      | <0.5              | <0.05      | <0.5       | 14                       | 2.2        | 1            |
| <b>Total</b> | <b>Total</b>           | <b>180,004</b> | <b>14,092</b> | <b>7.8</b> | <b>3,810</b>     | <b>2.1</b> | <b>40</b> | <b>2,508</b>            | <b>1.4</b> | <b>341</b> | <b>2,328</b>              | <b>1.3</b> | <b>99</b> | <b>552</b>        | <b>0.3</b> | <b>916</b> | <b>9,198</b>             | <b>5.1</b> | <b>1,397</b> |

\* P5 and P20 APOC-projects are a compilation of multiple areas within a country with a prevalence of palpable nodule of  $\geq 5\%$ –  $< 20\%$  and  $\geq 20\%$  respectively.

# Onchocerciasis hypoendemic areas with confirmed *L. loa* co-endemicity

Table W: Population at risk, number of cases with infection and clinical manifestations, and DALYs lost due to onchocerciasis by country and APOC-project for 2030. Absolute numbers (N and DALYs) are presented in thousands.

| Country  | Project      | Pop. at risk | Mf-positive |       | Palpable nodules |       |       | Reversible skin disease |       |       | Irreversible skin disease |     |       | Eye disease (OED) |       |       | Total all manifestations |     |       |
|----------|--------------|--------------|-------------|-------|------------------|-------|-------|-------------------------|-------|-------|---------------------------|-----|-------|-------------------|-------|-------|--------------------------|-----|-------|
|          |              |              | N           | %     | N                | %     | DALYs | N                       | %     | DALYs | N                         | %   | DALYs | N                 | %     | DALYs | N                        | %   | DALYs |
| Angola   | Bengo        | 39           | <0.5        | <0.05 | <0.5             | <0.05 | <0.5  | <0.5                    | <0.05 | <0.5  | <0.5                      | 0.5 | <0.5  | <0.5              | <0.05 | <0.5  | <0.5                     | 0.5 | <0.5  |
| Angola   | Benguela     | 75           | <0.5        | 0.3   | <0.5             | 0.1   | <0.5  | <0.5                    | <0.05 | <0.5  | <0.5                      | 0.5 | <0.5  | <0.5              | <0.05 | <0.5  | <0.5                     | 0.6 | <0.5  |
| Angola   | Cuanza Norte | 38           | <0.5        | <0.05 | <0.5             | <0.05 | <0.5  | <0.5                    | <0.05 | <0.5  | <0.5                      | 0.4 | <0.5  | <0.5              | <0.05 | <0.5  | <0.5                     | 0.4 | <0.5  |
| Angola   | Huila        | 352          | 1           | 0.3   | <0.5             | 0.1   | <0.5  | <0.5                    | <0.05 | <0.5  | 3                         | 0.8 | <0.5  | <0.5              | <0.05 | <0.5  | 3                        | 0.9 | <0.5  |
| Angola   | Kuando       | 607          | <0.5        | <0.05 | <0.5             | <0.05 | <0.5  | <0.5                    | <0.05 | <0.5  | 2                         | 0.3 | <0.5  | <0.5              | <0.05 | <0.5  | 2                        | 0.3 | <0.5  |
| Angola   | Kubango      |              |             |       |                  |       |       |                         |       |       |                           |     |       |                   |       |       |                          |     |       |
| Angola   | Lunda Norte  | 453          | <0.5        | <0.05 | <0.5             | <0.05 | <0.5  | <0.5                    | <0.05 | <0.5  | 2                         | 0.5 | <0.5  | <0.5              | <0.05 | <0.5  | 2                        | 0.5 | <0.5  |
| Angola   | Lunda sul    | 382          | <0.5        | <0.05 | <0.5             | <0.05 | <0.5  | <0.5                    | <0.05 | <0.5  | 2                         | 0.5 | <0.5  | <0.5              | <0.05 | <0.5  | 2                        | 0.5 | <0.5  |
| Angola   | Moxico 1     | 399          | <0.5        | <0.05 | <0.5             | <0.05 | <0.5  | <0.5                    | <0.05 | <0.5  | 2                         | 0.4 | <0.5  | <0.5              | <0.05 | <0.5  | 2                        | 0.4 | <0.5  |
| Angola   | Namibe       | 53           | 3           | 5.3   | <0.5             | 0.9   | <0.5  | <0.5                    | 0.4   | <0.5  | 1                         | 1.0 | <0.5  | <0.5              | <0.05 | <0.5  | 1                        | 2.3 | <0.5  |
| Angola   | NY Benguela  | 168          | 9           | 5.6   | 2                | 1.1   | <0.5  | 1                       | 0.5   | <0.5  | 2                         | 1.0 | <0.5  | <0.5              | <0.05 | <0.5  | 4                        | 2.6 | <0.5  |
| Angola   | NY Cuanza    | 27           | 1           | 4.3   | <0.5             | 0.5   | <0.5  | <0.5                    | 0.4   | <0.5  | <0.5                      | 0.9 | <0.5  | <0.5              | <0.05 | <0.5  | <0.5                     | 1.7 | <0.5  |
| Angola   | Norte        |              |             |       |                  |       |       |                         |       |       |                           |     |       |                   |       |       |                          |     |       |
| Angola   | NY Huila     | 34           | 2           | 5.6   | <0.5             | 1.0   | <0.5  | <0.5                    | 0.5   | <0.5  | <0.5                      | 1.0 | <0.5  | <0.5              | <0.05 | <0.5  | 1                        | 2.5 | <0.5  |
| Angola   | NY Lunda     | 99           | 5           | 5.4   | 1                | 0.9   | <0.5  | <0.5                    | 0.4   | <0.5  | 1                         | 1.0 | <0.5  | <0.5              | <0.05 | <0.5  | 2                        | 2.3 | <0.5  |
| Angola   | Norte        |              |             |       |                  |       |       |                         |       |       |                           |     |       |                   |       |       |                          |     |       |
| Angola   | NY Moxico 1  | 510          | 14          | 2.8   | 2                | 0.3   | <0.5  | 1                       | 0.2   | <0.5  | 3                         | 0.6 | <0.5  | <0.5              | <0.05 | <0.5  | 6                        | 1.2 | <0.5  |
| Angola   | P5Angola*#   | 388          | 50          | 12.8  | 6                | 1.6   | <0.5  | 5                       | 1.4   | 1     | 4                         | 1.0 | <0.5  | <0.5              | <0.05 | <0.5  | 16                       | 4.0 | 1     |
| Angola   | Uige         | 280          | 15          | 5.2   | 3                | 1.0   | <0.5  | 1                       | 0.4   | <0.5  | 3                         | 0.9 | <0.5  | <0.5              | <0.05 | <0.5  | 7                        | 2.4 | <0.5  |
| Angola   | Zaire        | 21           | 1           | 2.9   | <0.5             | 0.3   | <0.5  | <0.5                    | 0.2   | <0.5  | <0.5                      | 0.6 | <0.5  | <0.5              | <0.05 | <0.5  | <0.5                     | 1.2 | <0.5  |
| Burundi  | Bururi       | 652          | <0.5        | <0.05 | <0.5             | <0.05 | <0.5  | <0.5                    | <0.05 | <0.5  | 2                         | 0.3 | <0.5  | <0.5              | <0.05 | <0.5  | 2                        | 0.4 | <0.5  |
| Burundi  | Cibitoke-    | 1,557        | <0.5        | <0.05 | <0.5             | <0.05 | <0.5  | <0.5                    | <0.05 | <0.5  | 8                         | 0.5 | <0.5  | <0.5              | <0.05 | <0.5  | 8                        | 0.5 | <0.5  |
| Burundi  | Bubanza      |              |             |       |                  |       |       |                         |       |       |                           |     |       |                   |       |       |                          |     |       |
| Burundi  | P5Burundi*#  | 1,228        | 163         | 13.3  | 25               | 2.0   | <0.5  | 17                      | 1.4   | 3     | 13                        | 1.0 | <0.5  | <0.5              | <0.05 | <0.5  | 55                       | 4.5 | 4     |
| Burundi  | Rutana       | 508          | <0.5        | <0.05 | <0.5             | <0.05 | <0.5  | <0.5                    | <0.05 | <0.5  | 1                         | 0.3 | <0.5  | <0.5              | <0.05 | <0.5  | 1                        | 0.3 | <0.5  |
| Cameroon | Adamaoua 1   | 850          | <0.5        | <0.05 | <0.5             | <0.05 | <0.5  | <0.5                    | <0.05 | <0.5  | 4                         | 0.5 | <0.5  | 4                 | 0.5   | 4     | 8                        | 1.0 | 4     |
| Cameroon | Adamaoua 2   | 772          | <0.5        | <0.05 | <0.5             | <0.05 | <0.5  | <0.5                    | <0.05 | <0.5  | 3                         | 0.4 | <0.5  | 3                 | 0.4   | 2     | 6                        | 0.8 | 3     |
| Cameroon | Centre 1     | 785          | 1           | 0.1   | <0.5             | <0.05 | <0.5  | <0.5                    | <0.05 | <0.5  | 8                         | 1.0 | <0.5  | <0.5              | <0.05 | <0.5  | 8                        | 1.1 | 1     |
| Cameroon | Centre 2     | 185          | 1           | 0.3   | <0.5             | 0.1   | <0.5  | <0.5                    | <0.05 | <0.5  | 2                         | 0.9 | <0.5  | <0.5              | <0.05 | <0.5  | 2                        | 1.0 | <0.5  |
| Cameroon | Centre 3     | 596          | <0.5        | <0.05 | <0.5             | <0.05 | <0.5  | <0.5                    | <0.05 | <0.5  | 3                         | 0.6 | <0.5  | <0.5              | <0.05 | <0.5  | 3                        | 0.6 | <0.5  |
| Cameroon | East         | 218          | <0.5        | 0.2   | <0.5             | 0.1   | <0.5  | <0.5                    | <0.05 | <0.5  | 2                         | 0.9 | <0.5  | <0.5              | <0.05 | <0.5  | 2                        | 1.1 | <0.5  |
| Cameroon | Far North    | 515          | <0.5        | <0.05 | <0.5             | <0.05 | <0.5  | <0.5                    | <0.05 | <0.5  | 1                         | 0.2 | <0.5  | 1                 | 0.2   | 1     | 2                        | 0.4 | 1     |

(continued)

| Country  | Project              | Pop. at risk | Mf-positive |       | Palpable nodules |       |       | Reversible skin disease |       |       | Irreversible skin disease |     |       | Eye disease (OED) |       |       | Total all manifestations |     |       |
|----------|----------------------|--------------|-------------|-------|------------------|-------|-------|-------------------------|-------|-------|---------------------------|-----|-------|-------------------|-------|-------|--------------------------|-----|-------|
|          |                      |              | N           | %     | N                | %     | DALYs | N                       | %     | DALYs | N                         | %   | DALYs | N                 | %     | DALYs | N                        | %   | DALYs |
| Cameroon | Littoral 1           | 515          | 8           | 1.5   | 2                | 0.4   | <0.5  | <0.5                    | 0.1   | <0.5  | 8                         | 1.5 | <0.5  | <0.5              | 0.1   | 1     | 11                       | 2.1 | 1     |
| Cameroon | Littoral 2           | 275          | 3           | 1.0   | 1                | 0.3   | <0.5  | <0.5                    | <0.05 | <0.5  | 4                         | 1.6 | <0.5  | <0.5              | 0.1   | 1     | 6                        | 2.0 | 1     |
| Cameroon | Northern             | 1,155        | <0.5        | <0.05 | <0.5             | <0.05 | <0.5  | <0.5                    | <0.05 | <0.5  | 7                         | 0.6 | <0.5  | 8                 | 0.7   | 10    | 15                       | 1.3 | 10    |
| Cameroon | Northwest            | 1,501        | 1           | 0.1   | <0.5             | <0.05 | <0.5  | <0.5                    | <0.05 | <0.5  | 11                        | 0.7 | <0.5  | <0.5              | <0.05 | <0.5  | 12                       | 0.8 | 1     |
| Cameroon | P20Cameroon*         | 276          | 8           | 2.9   | 3                | 1.1   | <0.5  | 1                       | 0.3   | <0.5  | 4                         | 1.5 | <0.5  | <0.5              | <0.05 | <0.5  | 8                        | 2.9 | 1     |
| Cameroon | P5Cameroon*#         | 2,751        | 395         | 14.4  | 64               | 2.3   | 1     | 45                      | 1.6   | 7     | 31                        | 1.1 | 1     | 1                 | <0.05 | 1     | 141                      | 5.1 | 10    |
| Cameroon | South                | 548          | <0.5        | <0.05 | <0.5             | <0.05 | <0.5  | <0.5                    | <0.05 | <0.5  | 2                         | 0.5 | <0.5  | <0.5              | <0.05 | <0.5  | 3                        | 0.5 | <0.5  |
| Cameroon | South West 1         | 719          | <0.5        | <0.05 | <0.5             | <0.05 | <0.5  | <0.5                    | <0.05 | <0.5  | 9                         | 1.2 | <0.5  | <0.5              | <0.05 | <0.5  | 9                        | 1.3 | 1     |
| Cameroon | South West 2         | 489          | <0.5        | <0.05 | <0.5             | <0.05 | <0.5  | <0.5                    | <0.05 | <0.5  | 5                         | 1.0 | <0.5  | <0.5              | <0.05 | <0.5  | 5                        | 1.0 | <0.5  |
| Cameroon | Western              | 3,007        | 9           | 0.3   | 3                | 0.1   | <0.5  | <0.5                    | <0.05 | <0.5  | 57                        | 1.9 | 3     | 3                 | 0.1   | 7     | 63                       | 2.1 | 9     |
| CAR      | CAR region 3         | 784          | 3           | 0.4   | 1                | 0.1   | <0.5  | <0.5                    | <0.05 | <0.5  | 6                         | 0.8 | <0.5  | 7                 | 0.9   | 8     | 14                       | 1.8 | 9     |
| CAR      | CAR region 4         | 817          | 1           | 0.1   | <0.5             | <0.05 | <0.5  | <0.5                    | <0.05 | <0.5  | 3                         | 0.4 | <0.5  | 3                 | 0.4   | 3     | 7                        | 0.8 | 3     |
| CAR      | CAR region 5         | 756          | <0.5        | <0.05 | <0.5             | <0.05 | <0.5  | <0.5                    | <0.05 | <0.5  | 2                         | 0.3 | <0.5  | 2                 | 0.3   | 1     | 4                        | 0.6 | 1     |
| CAR      | CAR region 6         | 1,163        | 3           | 0.2   | 1                | 0.1   | <0.5  | <0.5                    | <0.05 | <0.5  | 7                         | 0.6 | <0.5  | 7                 | 0.6   | 7     | 15                       | 1.2 | 7     |
| CAR      | P20CAR*              | 115          | 14          | 11.9  | 4                | 3.8   | <0.5  | 1                       | 1.1   | <0.5  | 2                         | 1.8 | <0.5  | <0.5              | <0.05 | <0.5  | 8                        | 6.8 | <0.5  |
| CAR      | P5CAR*#              | 260          | 42          | 16.1  | 8                | 3.2   | <0.5  | 5                       | 1.9   | 1     | 3                         | 1.3 | <0.5  | <0.5              | <0.05 | <0.5  | 17                       | 6.5 | 1     |
| Chad     | Chad                 | 3,160        | <0.5        | <0.05 | <0.5             | <0.05 | <0.5  | <0.5                    | <0.05 | <0.5  | 8                         | 0.3 | <0.5  | 8                 | 0.3   | 6     | 16                       | 0.5 | 6     |
| Chad     | P5Chad*#             | 393          | 59          | 15.0  | 14               | 3.6   | <0.5  | 7                       | 1.7   | 1     | 4                         | 1.1 | <0.5  | 5                 | 1.3   | 8     | 30                       | 7.7 | 10    |
| Chad     | P5Chad<br>propext*#  | 226          | 27          | 11.7  | 4                | 1.8   | <0.5  | 3                       | 1.2   | <0.5  | 2                         | 0.9 | <0.5  | 2                 | 1.0   | 3     | 11                       | 4.9 | 4     |
| Congo    | Congo 1              | 1,441        | <0.5        | <0.05 | <0.5             | <0.05 | <0.5  | <0.5                    | <0.05 | <0.5  | 5                         | 0.3 | <0.5  | <0.5              | <0.05 | <0.5  | 5                        | 0.3 | <0.5  |
| Congo    | P20Congo*            | 63           | 2           | 2.7   | 1                | 1.1   | <0.5  | <0.5                    | 0.2   | <0.5  | 1                         | 2.3 | <0.5  | <0.5              | 0.1   | <0.5  | 2                        | 3.6 | <0.5  |
| Congo    | P5Congo*#            | 846          | 142         | 16.8  | 29               | 3.4   | <0.5  | 18                      | 2.1   | 3     | 12                        | 1.5 | <0.5  | <0.5              | <0.05 | 1     | 59                       | 7.0 | 4     |
| DRC      | Bandundu             | 10           | <0.5        | <0.05 | <0.5             | <0.05 | <0.5  | <0.5                    | <0.05 | <0.5  | <0.5                      | 0.4 | <0.5  | <0.5              | <0.05 | <0.5  | <0.5                     | 0.4 | <0.5  |
| DRC      | Bas-Congo            | 2,378        | 1           | 0.1   | 1                | <0.05 | <0.5  | <0.5                    | <0.05 | <0.5  | 15                        | 0.6 | 1     | <0.5              | <0.05 | <0.5  | 16                       | 0.7 | 1     |
| DRC      | Kinshasa<br>Butembo- | 1,478        | 11          | 0.7   | 3                | 0.2   | <0.5  | 1                       | <0.05 | <0.5  | 15                        | 1.0 | 1     | <0.5              | <0.05 | 1     | 20                       | 1.4 | 1     |
| DRC      | Beni                 | 1,964        | 2           | 0.1   | 1                | <0.05 | <0.5  | <0.5                    | <0.05 | <0.5  | 16                        | 0.8 | 1     | <0.5              | <0.05 | <0.5  | 17                       | 0.9 | 1     |
| DRC      | Equateur-Kiri        | 1,987        | 57          | 2.9   | 20               | 1.0   | <0.5  | 2                       | 0.1   | <0.5  | 57                        | 2.9 | 3     | 4                 | 0.2   | 11    | 83                       | 4.2 | 15    |
| DRC      | Ituri-Nord           | 1,816        | 177         | 9.7   | 66               | 3.6   | 1     | 11                      | 0.6   | 2     | 55                        | 3.0 | 3     | 4                 | 0.2   | 12    | 136                      | 7.5 | 17    |
| DRC      | Ituri-Sud            | 17,038       | 138         | 0.8   | 46               | 0.3   | <0.5  | 4                       | <0.05 | 1     | 146                       | 0.9 | 7     | 6                 | <0.05 | 16    | 202                      | 1.2 | 23    |
| DRC      | Kasai                | 2,134        | 8           | 0.4   | 3                | 0.1   | <0.5  | <0.5                    | <0.05 | <0.5  | 15                        | 0.7 | 1     | <0.5              | <0.05 | 1     | 18                       | 0.9 | 1     |

(continued)

| Country            | Project                    | Pop. at risk | Mf-positive |       | Palpable nodules |       |       | Reversible skin disease |       |       | Irreversible skin disease |     |       | Eye disease (OED) |       |       | Total all manifestations |      |       |
|--------------------|----------------------------|--------------|-------------|-------|------------------|-------|-------|-------------------------|-------|-------|---------------------------|-----|-------|-------------------|-------|-------|--------------------------|------|-------|
|                    |                            |              | N           | %     | N                | %     | DALYs | N                       | %     | DALYs | N                         | %   | DALYs | N                 | %     | DALYs | N                        | %    | DALYs |
| DRC                | Katanga-Nord               | 992          | 3           | 0.3   | 1                | 0.1   | <0.5  | <0.5                    | <0.05 | <0.5  | 9                         | 0.9 | <0.5  | <0.5              | <0.05 | 1     | 11                       | 1.1  | 1     |
| DRC                | Katanga-Sud                | 1,098        | 9           | 0.8   | 3                | 0.3   | <0.5  | <0.5                    | <0.05 | <0.5  | 11                        | 1.0 | <0.5  | <0.5              | <0.05 | 1     | 15                       | 1.3  | 2     |
| DRC                | Lualaba                    | 356          | <0.5        | <0.05 | <0.5             | <0.05 | <0.5  | <0.5                    | <0.05 | <0.5  | 3                         | 0.8 | <0.5  | <0.5              | <0.05 | <0.5  | 3                        | 0.8  | <0.5  |
| DRC                | Lubutu                     | 529          | 5           | 0.9   | 2                | 0.3   | <0.5  | <0.5                    | 0.1   | <0.5  | 9                         | 1.7 | <0.5  | <0.5              | <0.05 | <0.5  | 11                       | 2.1  | 1     |
| DRC                | Masisi-<br>Walikale        | 1,659        | 40          | 2.4   | 14               | 0.9   | <0.5  | 2                       | 0.1   | <0.5  | 28                        | 1.7 | 1     | 1                 | 0.1   | 3     | 46                       | 2.8  | 5     |
| DRC                | Mongala                    | 2,306        | 2           | 0.1   | 1                | <0.05 | <0.5  | <0.5                    | <0.05 | <0.5  | 16                        | 0.7 | 1     | <0.5              | <0.05 | 1     | 18                       | 0.8  | 1     |
| DRC                | NY                         | 720          | 10          | 1.4   | 2                | 0.3   | <0.5  | 1                       | 0.1   | <0.5  | 5                         | 0.7 | <0.5  | <0.5              | <0.05 | <0.5  | 8                        | 1.2  | <0.5  |
| DRC                | Katanga-Nord<br>NY Lualaba | 1,557        | 27          | 1.7   | 5                | 0.3   | <0.5  | 2                       | 0.1   | <0.5  | 13                        | 0.9 | <0.5  | <0.5              | <0.05 | <0.5  | 21                       | 1.3  | 1     |
| DRC                | NY Masisi-<br>Walikale     | 86           | 2           | 2.5   | 1                | 0.7   | <0.5  | <0.5                    | 0.2   | <0.5  | 1                         | 1.2 | <0.5  | <0.5              | <0.05 | <0.5  | 2                        | 2.1  | <0.5  |
| DRC                | NY Rutshuru-<br>Ngoma      | 13           | <0.5        | 1.3   | <0.5             | 0.4   | <0.5  | <0.5                    | 0.1   | <0.5  | <0.5                      | 1.5 | <0.5  | <0.5              | <0.05 | <0.5  | <0.5                     | 2.1  | <0.5  |
| DRC                | NY Sankuru                 | 743          | 10          | 1.3   | 3                | 0.4   | <0.5  | 1                       | 0.1   | <0.5  | 6                         | 0.9 | <0.5  | <0.5              | <0.05 | <0.5  | 10                       | 1.4  | 1     |
| DRC                | NY Ueles                   | 253          | 36          | 14.4  | 15               | 5.9   | <0.5  | 3                       | 1.1   | <0.5  | 9                         | 3.6 | <0.5  | 1                 | 0.3   | 2     | 27                       | 10.9 | 3     |
| DRC                | P20DRC*                    | 3,726        | 518         | 13.9  | 219              | 5.9   | 2     | 57                      | 1.5   | 9     | 94                        | 2.5 | 4     | 5                 | 0.1   | 15    | 375                      | 10.1 | 31    |
| DRC                | P5DRC*#                    | 11,848       | 1,732       | 14.6  | 287              | 2.4   | 3     | 196                     | 1.7   | 30    | 143                       | 1.2 | 5     | 2                 | <0.05 | 2     | 629                      | 5.3  | 40    |
| DRC                | Rutshuru-<br>Ngoma         | 1,045        | <0.5        | <0.05 | <0.5             | <0.05 | <0.5  | <0.5                    | <0.05 | <0.5  | 7                         | 0.6 | <0.5  | <0.5              | <0.05 | <0.5  | 7                        | 0.7  | <0.5  |
| DRC                | Sankuru                    | 1,690        | 13          | 0.8   | 5                | 0.3   | <0.5  | <0.5                    | <0.05 | <0.5  | 25                        | 1.5 | 1     | 2                 | 0.1   | 4     | 32                       | 1.9  | 6     |
| DRC                | Tshopo                     | 2,525        | 92          | 3.6   | 31               | 1.2   | <0.5  | 5                       | 0.2   | 1     | 40                        | 1.6 | 2     | 2                 | 0.1   | 5     | 78                       | 3.1  | 8     |
| DRC                | Tshuapa                    | 2,249        | 67          | 3.0   | 22               | 1.0   | <0.5  | 4                       | 0.2   | 1     | 35                        | 1.6 | 2     | 1                 | 0.1   | 3     | 62                       | 2.8  | 6     |
| DRC                | Ubangi-Nord                | 1,267        | 56          | 4.4   | 19               | 1.5   | <0.5  | 3                       | 0.2   | <0.5  | 21                        | 1.6 | 1     | 1                 | 0.1   | 3     | 44                       | 3.5  | 5     |
| DRC                | Ubangi-Sud                 | 2,136        | 2           | 0.1   | 1                | <0.05 | <0.5  | <0.5                    | <0.05 | <0.5  | 13                        | 0.6 | <0.5  | <0.5              | <0.05 | <0.5  | 14                       | 0.7  | 1     |
| DRC                | Ueles                      | 2,492        | 76          | 3.0   | 24               | 1.0   | <0.5  | 2                       | 0.1   | <0.5  | 51                        | 2.1 | 3     | 3                 | 0.1   | 9     | 81                       | 3.2  | 12    |
| Eq.                | Bioko                      | 176          | <0.5        | <0.05 | <0.5             | <0.05 | <0.5  | <0.5                    | <0.05 | <0.5  | 2                         | 1.4 | <0.5  | <0.5              | 0.1   | <0.5  | 3                        | 1.4  | <0.5  |
| Guinea<br>Eq.      | P5EqGuinea*#               | 412          | <0.5        | <0.05 | <0.5             | <0.05 | <0.5  | <0.5                    | <0.05 | <0.5  | 1                         | 0.2 | <0.5  | <0.5              | <0.05 | <0.5  | 1                        | 0.2  | <0.5  |
| Guinea<br>Ethiopia | Assosa                     | 939          | 1           | 0.1   | 3                | 0.3   | <0.5  | 1                       | 0.1   | <0.5  | 8                         | 0.9 | <0.5  | <0.5              | <0.05 | <0.5  | 13                       | 1.3  | 1     |
| Ethiopia           | Bench-Maji                 | 1,242        | <0.5        | <0.05 | <0.5             | <0.05 | <0.5  | <0.5                    | <0.05 | <0.5  | 7                         | 0.5 | <0.5  | <0.5              | <0.05 | <0.5  | 7                        | 0.5  | <0.5  |
| Ethiopia           | East Wellega               | 1,521        | <0.5        | <0.05 | <0.5             | <0.05 | <0.5  | <0.5                    | <0.05 | <0.5  | 8                         | 0.5 | <0.5  | <0.5              | <0.05 | <0.5  | 8                        | 0.5  | <0.5  |
| Ethiopia           | Gambella                   | 182          | <0.5        | <0.05 | <0.5             | <0.05 | <0.5  | <0.5                    | <0.05 | <0.5  | 1                         | 0.5 | <0.5  | <0.5              | <0.05 | <0.5  | 1                        | 0.5  | <0.5  |

(continued)

| Country  | Project        | Pop. at risk | Mf-positive |       | Palpable nodules |       |       | Reversible skin disease |       |       | Irreversible skin disease |     |       | Eye disease (OED) |       |       | Total all manifestations |     |       |
|----------|----------------|--------------|-------------|-------|------------------|-------|-------|-------------------------|-------|-------|---------------------------|-----|-------|-------------------|-------|-------|--------------------------|-----|-------|
|          |                |              | N           | %     | N                | %     | DALYs | N                       | %     | DALYs | N                         | %   | DALYs | N                 | %     | DALYs | N                        | %   | DALYs |
| Ethiopia | Horo Guduru    | 89           | 4           | 4.4   | 1                | 1.4   | <0.5  | <0.5                    | 0.3   | <0.5  | 1                         | 1.2 | <0.5  | <0.5              | <0.05 | <0.5  | 3                        | 3.0 | <0.5  |
| Ethiopia | Illubabor      | 1,287        | <0.5        | <0.05 | <0.5             | <0.05 | <0.5  | <0.5                    | <0.05 | <0.5  | 7                         | 0.6 | <0.5  | <0.5              | <0.05 | <0.5  | 7                        | 0.6 | <0.5  |
| Ethiopia | Jimma          | 1,519        | <0.5        | <0.05 | <0.5             | <0.05 | <0.5  | <0.5                    | <0.05 | <0.5  | 5                         | 0.3 | <0.5  | <0.5              | <0.05 | <0.5  | 5                        | 0.3 | <0.5  |
| Ethiopia | Kaffa-Sheka    | 2,157        | <0.5        | <0.05 | <0.5             | <0.05 | <0.5  | <0.5                    | <0.05 | <0.5  | 14                        | 0.6 | <0.5  | <0.5              | <0.05 | <0.5  | 14                       | 0.6 | 1     |
| Ethiopia | Kamashi        | 802          | <0.5        | <0.05 | 1                | 0.1   | <0.5  | 1                       | 0.1   | <0.5  | 10                        | 1.3 | <0.5  | <0.5              | <0.05 | 1     | 12                       | 1.5 | 1     |
| Ethiopia | Metekel        | 275          | <0.5        | <0.05 | <0.5             | <0.05 | <0.5  | <0.5                    | <0.05 | <0.5  | 1                         | 0.4 | <0.5  | <0.5              | <0.05 | <0.5  | 1                        | 0.4 | <0.5  |
| Ethiopia | North Gondar   | 533          | <0.5        | <0.05 | <0.5             | <0.05 | <0.5  | <0.5                    | <0.05 | <0.5  | 2                         | 0.4 | <0.5  | <0.5              | <0.05 | <0.5  | 2                        | 0.4 | <0.5  |
| Ethiopia | NY East        | 487          | 8           | 1.7   | 3                | 0.7   | <0.5  | 1                       | 0.2   | <0.5  | 6                         | 1.2 | <0.5  | <0.5              | <0.05 | <0.5  | 10                       | 2.1 | 1     |
| Ethiopia | Wellega        |              |             |       |                  |       |       |                         |       |       |                           |     |       |                   |       |       |                          |     |       |
| Ethiopia | NY West        | 495          | <0.5        | <0.05 | <0.5             | <0.05 | <0.5  | <0.5                    | <0.05 | <0.5  | 3                         | 0.6 | <0.5  | <0.5              | <0.05 | <0.5  | 3                        | 0.7 | <0.5  |
| Ethiopia | Wellega        |              |             |       |                  |       |       |                         |       |       |                           |     |       |                   |       |       |                          |     |       |
| Ethiopia | P20Ethiopia*   | 566          | 39          | 6.9   | 16               | 2.9   | <0.5  | 4                       | 0.7   | 1     | 10                        | 1.7 | <0.5  | <0.5              | <0.05 | 1     | 30                       | 5.3 | 2     |
| Ethiopia | P5Ethiopia*    | 5,972        | 619         | 10.4  | 100              | 1.7   | 1     | 56                      | 0.9   | 9     | 64                        | 1.1 | 2     | 1                 | <0.05 | 1     | 221                      | 3.7 | 14    |
| Ethiopia | West Shewa     | 98           | 9           | 9.0   | 1                | 1.2   | <0.5  | 1                       | 0.8   | <0.5  | 1                         | 0.9 | <0.5  | <0.5              | <0.05 | <0.5  | 3                        | 2.9 | <0.5  |
| Ethiopia | West Wellega   | 1,747        | <0.5        | <0.05 | <0.5             | <0.05 | <0.5  | <0.5                    | <0.05 | <0.5  | 14                        | 0.8 | 1     | <0.5              | <0.05 | <0.5  | 15                       | 0.9 | 1     |
| Gabon    | P5Gabon*#      | 146          | 17          | 11.9  | 2                | 1.5   | <0.5  | 2                       | 1.2   | <0.5  | 1                         | 0.9 | <0.5  | <0.5              | <0.05 | <0.5  | 5                        | 3.6 | <0.5  |
| Liberia  | All_Liberia    | 2,606        | <0.5        | <0.05 | <0.5             | <0.05 | <0.5  | <0.5                    | <0.05 | <0.5  | 8                         | 0.3 | <0.5  | <0.5              | <0.05 | <0.5  | 8                        | 0.3 | <0.5  |
| Malawi   | Malawi         | 1,968        | <0.5        | <0.05 | <0.5             | <0.05 | <0.5  | <0.5                    | <0.05 | <0.5  | 4                         | 0.2 | <0.5  | <0.5              | <0.05 | <0.5  | 4                        | 0.2 | <0.5  |
| Malawi   | Extension      |              |             |       |                  |       |       |                         |       |       |                           |     |       |                   |       |       |                          |     |       |
| Malawi   | Thyolo         | 1,501        | <0.5        | <0.05 | <0.5             | <0.05 | <0.5  | <0.5                    | <0.05 | <0.5  | 3                         | 0.2 | <0.5  | <0.5              | <0.05 | <0.5  | 3                        | 0.2 | <0.5  |
| Malawi   | Mwanza         |              |             |       |                  |       |       |                         |       |       |                           |     |       |                   |       |       |                          |     |       |
| Mozamb.  | P20Mozambique* | 27           | 1           | 2.7   | <0.5             | 0.3   | <0.5  | <0.5                    | 0.2   | <0.5  | <0.5                      | 0.6 | <0.5  | <0.5              | <0.05 | <0.5  | <0.5                     | 1.2 | <0.5  |
| Mozamb.  | P5Mozambique*  | 80           | 5           | 6.8   | 1                | 0.8   | <0.5  | <0.5                    | 0.6   | <0.5  | 1                         | 0.7 | <0.5  | <0.5              | <0.05 | <0.5  | 2                        | 2.1 | <0.5  |
| Nigeria  | Adamawa        | 3,015        | <0.5        | <0.05 | <0.5             | <0.05 | <0.5  | <0.5                    | <0.05 | <0.5  | 6                         | 0.2 | <0.5  | 5                 | 0.2   | 4     | 12                       | 0.4 | 4     |
| Nigeria  | Akwa Ibom      | 52           | <0.5        | <0.05 | <0.5             | <0.05 | <0.5  | <0.5                    | <0.05 | <0.5  | <0.5                      | 0.3 | <0.5  | <0.5              | <0.05 | <0.5  | <0.5                     | 0.3 | <0.5  |
| Nigeria  | Bauchi         | 3,089        | <0.5        | <0.05 | <0.5             | <0.05 | <0.5  | <0.5                    | <0.05 | <0.5  | 7                         | 0.2 | <0.5  | 7                 | 0.2   | 5     | 14                       | 0.5 | 5     |
| Nigeria  | Benue          | 6,092        | 1           | <0.05 | <0.5             | <0.05 | <0.5  | <0.5                    | <0.05 | <0.5  | 34                        | 0.6 | 1     | <0.5              | <0.05 | 1     | 34                       | 0.6 | 2     |
| Nigeria  | Borno          | 2,428        | <0.5        | <0.05 | <0.5             | <0.05 | <0.5  | <0.5                    | <0.05 | <0.5  | 3                         | 0.1 | <0.5  | 3                 | 0.1   | 1     | 6                        | 0.3 | 1     |
| Nigeria  | Cross River    | 2,202        | <0.5        | <0.05 | <0.5             | <0.05 | <0.5  | <0.5                    | <0.05 | <0.5  | 6                         | 0.3 | <0.5  | <0.5              | <0.05 | <0.5  | 7                        | 0.3 | <0.5  |
| Nigeria  | Edo Delta      | 2,831        | <0.5        | <0.05 | <0.5             | <0.05 | <0.5  | <0.5                    | <0.05 | <0.5  | 6                         | 0.2 | <0.5  | <0.5              | <0.05 | <0.5  | 6                        | 0.2 | <0.5  |
| Nigeria  | Ekiti          | 3,821        | <0.5        | <0.05 | <0.5             | <0.05 | <0.5  | <0.5                    | <0.05 | <0.5  | 7                         | 0.2 | <0.5  | <0.5              | <0.05 | <0.5  | 7                        | 0.2 | <0.5  |
| Nigeria  | Enugu          | 4,206        | <0.5        | <0.05 | <0.5             | <0.05 | <0.5  | <0.5                    | <0.05 | <0.5  | 25                        | 0.6 | 1     | <0.5              | <0.05 | 1     | 26                       | 0.6 | 2     |
| Nigeria  | Anambra        |              |             |       |                  |       |       |                         |       |       |                           |     |       |                   |       |       |                          |     |       |
| Nigeria  | Ebony          |              |             |       |                  |       |       |                         |       |       |                           |     |       |                   |       |       |                          |     |       |

(continued)

| Country     | Project             | Pop. at risk | Mf-positive |       | Palpable nodules |       |       | Reversible skin disease |       |       | Irreversible skin disease |     |       | Eye disease (OED) |       |       | Total all manifestations |     |       |
|-------------|---------------------|--------------|-------------|-------|------------------|-------|-------|-------------------------|-------|-------|---------------------------|-----|-------|-------------------|-------|-------|--------------------------|-----|-------|
|             |                     |              | N           | %     | N                | %     | DALYs | N                       | %     | DALYs | N                         | %   | DALYs | N                 | %     | DALYs | N                        | %   | DALYs |
| Nigeria     | FCT                 | 893          | <0.5        | <0.05 | <0.5             | <0.05 | <0.5  | <0.5                    | <0.05 | <0.5  | 2                         | 0.2 | <0.5  | <0.5              | <0.05 | <0.5  | 2                        | 0.2 | <0.5  |
| Nigeria     | Gombe               | 3,356        | <0.5        | <0.05 | <0.5             | <0.05 | <0.5  | <0.5                    | <0.05 | <0.5  | 8                         | 0.2 | <0.5  | 7                 | 0.2   | 3     | 15                       | 0.4 | 4     |
| Nigeria     | Imo Abia            | 2,319        | <0.5        | <0.05 | <0.5             | <0.05 | <0.5  | <0.5                    | <0.05 | <0.5  | 6                         | 0.3 | <0.5  | <0.5              | <0.05 | <0.5  | 6                        | 0.3 | <0.5  |
| Nigeria     | Jigawa              | 629          | <0.5        | <0.05 | <0.5             | <0.05 | <0.5  | <0.5                    | <0.05 | <0.5  | 1                         | 0.2 | <0.5  | 1                 | 0.2   | 1     | 2                        | 0.4 | 1     |
| Nigeria     | Kaduna              | 4,884        | <0.5        | <0.05 | <0.5             | <0.05 | <0.5  | <0.5                    | <0.05 | <0.5  | 4                         | 0.1 | <0.5  | 4                 | 0.1   | 1     | 8                        | 0.2 | 1     |
| Nigeria     | Kano                | 1,743        | <0.5        | <0.05 | <0.5             | <0.05 | <0.5  | <0.5                    | <0.05 | <0.5  | 3                         | 0.2 | <0.5  | 2                 | 0.1   | 1     | 5                        | 0.3 | 1     |
| Nigeria     | Kebbi               | 366          | <0.5        | <0.05 | <0.5             | <0.05 | <0.5  | <0.5                    | <0.05 | <0.5  | 1                         | 0.2 | <0.5  | 1                 | 0.1   | <0.5  | 1                        | 0.3 | <0.5  |
| Nigeria     | Kogi                | 3,146        | <0.5        | <0.05 | <0.5             | <0.05 | <0.5  | <0.5                    | <0.05 | <0.5  | 6                         | 0.2 | <0.5  | <0.5              | <0.05 | <0.5  | 6                        | 0.2 | <0.5  |
| Nigeria     | Kwara               | 2,659        | <0.5        | <0.05 | <0.5             | <0.05 | <0.5  | <0.5                    | <0.05 | <0.5  | 5                         | 0.2 | <0.5  | 5                 | 0.2   | 2     | 10                       | 0.4 | 3     |
| Nigeria     | Niger               | 4,675        | <0.5        | <0.05 | <0.5             | <0.05 | <0.5  | <0.5                    | <0.05 | <0.5  | 9                         | 0.2 | <0.5  | 8                 | 0.2   | 4     | 17                       | 0.4 | 5     |
| Nigeria     | Ogun                | 606          | <0.5        | <0.05 | <0.5             | <0.05 | <0.5  | <0.5                    | <0.05 | <0.5  | 2                         | 0.3 | <0.5  | <0.5              | <0.05 | <0.5  | 2                        | 0.3 | <0.5  |
| Nigeria     | Ondo                | 2,409        | <0.5        | <0.05 | <0.5             | <0.05 | <0.5  | <0.5                    | <0.05 | <0.5  | 5                         | 0.2 | <0.5  | <0.5              | <0.05 | <0.5  | 5                        | 0.2 | <0.5  |
| Nigeria     | Osun                | 2,842        | <0.5        | <0.05 | <0.5             | <0.05 | <0.5  | <0.5                    | <0.05 | <0.5  | 5                         | 0.2 | <0.5  | <0.5              | <0.05 | <0.5  | 5                        | 0.2 | <0.5  |
| Nigeria     | Oyo                 | 1,938        | <0.5        | <0.05 | <0.5             | <0.05 | <0.5  | <0.5                    | <0.05 | <0.5  | 3                         | 0.2 | <0.5  | 3                 | 0.2   | 2     | 6                        | 0.3 | 2     |
| Nigeria     | P20Nigeria *        | 391          | 23          | 6.0   | 9                | 2.2   | <0.5  | 2                       | 0.5   | <0.5  | 6                         | 1.6 | <0.5  | <0.5              | <0.05 | <0.5  | 17                       | 4.3 | 1     |
| Nigeria     | P5Nigeria *#        | 13,294       | 1,450       | 10.9  | 178              | 1.3   | 2     | 147                     | 1.1   | 23    | 112                       | 0.8 | 4     | 126               | 1.0   | 164   | 563                      | 4.2 | 192   |
| Nigeria     | Plateau             | 2,695        | <0.5        | <0.05 | <0.5             | <0.05 | <0.5  | <0.5                    | <0.05 | <0.5  | 6                         | 0.2 | <0.5  | 5                 | 0.2   | 3     | 11                       | 0.4 | 3     |
| Nigeria     | Nassarawa Plateau   | 2,729        | <0.5        | <0.05 | <0.5             | <0.05 | <0.5  | <0.5                    | <0.05 | <0.5  | 7                         | 0.2 | <0.5  | 7                 | 0.2   | 4     | 13                       | 0.5 | 4     |
| Nigeria     | Nassarawa LF Taraba | 2,932        | 1           | <0.05 | <0.5             | <0.05 | <0.5  | <0.5                    | <0.05 | <0.5  | 9                         | 0.3 | <0.5  | 10                | 0.3   | 9     | 20                       | 0.7 | 9     |
| Nigeria     | Yobe                | 1,085        | <0.5        | <0.05 | <0.5             | <0.05 | <0.5  | <0.5                    | <0.05 | <0.5  | 1                         | 0.1 | <0.5  | 1                 | 0.1   | 1     | 3                        | 0.2 | 1     |
| Nigeria     | Zamfara             | 503          | <0.5        | <0.05 | <0.5             | <0.05 | <0.5  | <0.5                    | <0.05 | <0.5  | 1                         | 0.2 | <0.5  | 1                 | 0.1   | <0.5  | 2                        | 0.3 | <0.5  |
| South Sudan | East Bahr El Ghazal | 966          | 4           | 0.4   | 1                | 0.1   | <0.5  | <0.5                    | <0.05 | <0.5  | 5                         | 0.5 | <0.5  | 5                 | 0.5   | 5     | 11                       | 1.2 | 5     |
| South Sudan | East Equatoria      | 1,716        | 26          | 1.5   | 7                | 0.4   | <0.5  | 1                       | 0.1   | <0.5  | 10                        | 0.6 | <0.5  | 11                | 0.6   | 11    | 29                       | 1.7 | 11    |
| South Sudan | P20SouthSudan*      | 48           | 7           | 13.6  | 2                | 3.9   | <0.5  | 1                       | 1.3   | <0.5  | 1                         | 1.5 | <0.5  | 1                 | 1.8   | 1     | 4                        | 8.5 | 2     |
| South Sudan | P5SouthSudan*#      | 1,331        | 141         | 10.6  | 17               | 1.3   | <0.5  | 14                      | 1.1   | 2     | 11                        | 0.8 | <0.5  | 12                | 0.9   | 16    | 54                       | 4.0 | 19    |
| South Sudan | Upper Nile          | 899          | 9           | 1.0   | 2                | 0.2   | <0.5  | 1                       | 0.1   | <0.5  | 4                         | 0.4 | <0.5  | 4                 | 0.5   | 4     | 10                       | 1.2 | 4     |
| South Sudan | West Bahr El Ghazal | 5,205        | 137         | 2.6   | 53               | 1.0   | 1     | 11                      | 0.2   | 2     | 38                        | 0.7 | 1     | 44                | 0.8   | 75    | 145                      | 2.8 | 79    |



(continued)

| Country      | Project                | Pop. at risk   | Mf-positive  |            | Palpable nodules |            |           | Reversible skin disease |            |            | Irreversible skin disease |            |           | Eye disease (OED) |            |            | Total all manifestations |            |            |
|--------------|------------------------|----------------|--------------|------------|------------------|------------|-----------|-------------------------|------------|------------|---------------------------|------------|-----------|-------------------|------------|------------|--------------------------|------------|------------|
|              |                        |                | N            | %          | N                | %          | DALYs     | N                       | %          | DALYs      | N                         | %          | DALYs     | N                 | %          | DALYs      | N                        | %          | DALYs      |
| South Sudan  | West Equatoria         | 1,228          | 1            | <0.05      | <0.5             | <0.05      | <0.5      | <0.5                    | <0.05      | <0.5       | 6                         | 0.5        | <0.5      | 7                 | 0.6        | 7          | 14                       | 1.1        | 7          |
| Sudan        | P5Sudan*#              | 375            | 48           | 12.9       | 7                | 1.8        | <0.5      | 5                       | 1.4        | 1          | 4                         | 1.0        | <0.5      | 4                 | 1.2        | 6          | 20                       | 5.3        | 7          |
| Sudan        | Sudan                  | 354            | <0.5         | <0.05      | <0.5             | <0.05      | <0.5      | <0.5                    | <0.05      | <0.5       | 1                         | 0.3        | <0.5      | 1                 | 0.3        | 1          | 2                        | 0.6        | 1          |
| Sudan        | Sudan Abu Hamed Kilosa | 354            | <0.5         | <0.05      | <0.5             | <0.05      | <0.5      | <0.5                    | <0.05      | <0.5       | 1                         | 0.3        | <0.5      | 1                 | 0.3        | 1          | 2                        | 0.6        | 1          |
| Tanzania     | Mahenge                | 849            | <0.5         | <0.05      | <0.5             | <0.05      | <0.5      | <0.5                    | <0.05      | <0.5       | 3                         | 0.3        | <0.5      | <0.5              | <0.05      | <0.5       | 3                        | 0.3        | <0.5       |
| Tanzania     | Morogoro               | 849            | 1            | 0.1        | <0.5             | <0.05      | <0.5      | <0.5                    | <0.05      | <0.5       | 5                         | 0.6        | <0.5      | <0.5              | <0.05      | <0.5       | 6                        | 0.7        | 1          |
| Tanzania     | P5Tanzania*            | 608            | <0.5         | <0.05      | <0.5             | <0.05      | <0.5      | <0.5                    | <0.05      | <0.5       | 2                         | 0.4        | <0.5      | <0.5              | <0.05      | <0.5       | 2                        | 0.4        | <0.5       |
| Tanzania     | Ruvuma                 | 1,540          | 182          | 11.8       | 33               | 2.2        | <0.5      | 19                      | 1.2        | 3          | 19                        | 1.2        | 1         | <0.5              | <0.05      | <0.5       | 71                       | 4.6        | 4          |
| Tanzania     | Tanga                  | 671            | 3            | 0.5        | 1                | 0.2        | <0.5      | <0.5                    | <0.05      | <0.5       | 9                         | 1.3        | <0.5      | <0.5              | 0.1        | 1          | 10                       | 1.5        | 1          |
| Tanzania     | Tukuyu                 | 526            | <0.5         | <0.05      | <0.5             | <0.05      | <0.5      | <0.5                    | <0.05      | <0.5       | 1                         | 0.3        | <0.5      | <0.5              | <0.05      | <0.5       | 1                        | 0.3        | <0.5       |
| Tanzania     | Tunduru                | 193            | <0.5         | <0.05      | <0.5             | <0.05      | <0.5      | <0.5                    | <0.05      | <0.5       | 1                         | 0.5        | <0.5      | <0.5              | <0.05      | <0.5       | 1                        | 0.5        | <0.5       |
| Uganda       | P5Uganda*              | 209            | <0.5         | 0.1        | <0.5             | <0.05      | <0.5      | <0.5                    | <0.05      | <0.5       | 2                         | 0.9        | <0.5      | <0.5              | <0.05      | <0.5       | 2                        | 1.0        | <0.5       |
| Uganda       | Phase 1                | 387            | <0.5         | <0.05      | <0.5             | <0.05      | <0.5      | <0.5                    | <0.05      | <0.5       | 1                         | 0.2        | <0.5      | <0.5              | <0.05      | <0.5       | 1                        | 0.2        | <0.5       |
| Uganda       | Phase 2                | 607            | <0.5         | <0.05      | <0.5             | <0.05      | <0.5      | <0.5                    | <0.05      | <0.5       | 1                         | 0.2        | <0.5      | <0.5              | <0.05      | <0.5       | 1                        | 0.2        | <0.5       |
| Uganda       | Phase 3                | 1,181          | <0.5         | <0.05      | <0.5             | <0.05      | <0.5      | <0.5                    | <0.05      | <0.5       | 2                         | 0.2        | <0.5      | <0.5              | <0.05      | <0.5       | 2                        | 0.2        | <0.5       |
| Uganda       | Phase 4                | 2,178          | <0.5         | <0.05      | <0.5             | <0.05      | <0.5      | <0.5                    | <0.05      | <0.5       | 16                        | 0.7        | 1         | 1                 | <0.05      | 1          | 17                       | 0.8        | 2          |
| Uganda       | Phase 5                | 1,233          | <0.5         | <0.05      | <0.5             | <0.05      | <0.5      | <0.5                    | <0.05      | <0.5       | 3                         | 0.2        | <0.5      | <0.5              | <0.05      | <0.5       | 3                        | 0.2        | <0.5       |
| Uganda       | Phase 5                | 794            | <0.5         | <0.05      | <0.5             | <0.05      | <0.5      | <0.5                    | <0.05      | <0.5       | 4                         | 0.5        | <0.5      | <0.5              | <0.05      | <0.5       | 4                        | 0.5        | <0.5       |
| <b>Total</b> | <b>Total</b>           | <b>236,102</b> | <b>6,813</b> | <b>2.9</b> | <b>1,412</b>     | <b>0.6</b> | <b>15</b> | <b>670</b>              | <b>0.3</b> | <b>104</b> | <b>1,756</b>              | <b>0.7</b> | <b>71</b> | <b>384</b>        | <b>0.2</b> | <b>501</b> | <b>4,223</b>             | <b>1.8</b> | <b>691</b> |

\* P5 and P20 APOC-projects are a compilation of multiple areas within a country with a prevalence of palpable nodule of  $\geq 5\%$ –  $< 20\%$  and  $\geq 20\%$  respectively.

# Onchocerciasis hypoendemic areas with confirmed *L. loa* co-endemicity
